# Supplementary material for: There and back again: the role of hyperconjugation in the fluorine gauche effect
Source: Royal Society of Chemistry journal article supplement (doi:10.1039/d1cp02806e), 2021-01-01
Supplement: d1cp02806e1.pdf [file d1cp02806e1.pdf]

## Supplementary Information

### **There and back again: the role of hyperconjugation in the fluorine gauche effect**

Vinícius C. Port,<sup>a</sup> Rodrigo A. Cormanich\*<sup>a</sup>

University of Campinas, Institute of Chemistry, Department of Organic Chemistry, 13083-970 – Campinas, SP, Brazil.

\*Corresponding author: [cormanich@unicamp.br](mailto:cormanich@unicamp.br)

## Contents

|                                                                                                                                                                                             |    |
|---------------------------------------------------------------------------------------------------------------------------------------------------------------------------------------------|----|
| Computational Details .....                                                                                                                                                                 | 11 |
| Table S1. Atomic Coordinates for the <i>gauche</i> and <i>anti</i> conformers of XCH <sub>2</sub> CH <sub>2</sub> X molecules obtained at the M06-2X/6-311++G(3df,2p) level.....            | 12 |
| Table S2. Atomic Coordinates for the <i>gauche</i> and <i>anti</i> conformers of XBH <sub>2</sub> NH <sub>2</sub> X molecules obtained at the M06-2X/6-311++G(3df,2p) level.....            | 13 |
| Table S3. Atomic Coordinates for the <i>gauche</i> and <i>anti</i> conformers of XCH <sub>2</sub> OX molecules obtained at the M06-2X/6-311++G(3df,2p) level.....                           | 14 |
| Table S4. Atomic Coordinates for the <i>gauche</i> and <i>anti</i> conformers of XCH <sub>2</sub> SX molecules molecules obtained at the M06-2X/6-311++G(3df,2p) level. ....                | 15 |
| Table S5. Atomic Coordinates for the <i>gauche</i> and <i>anti</i> conformers of XOOX molecules obtained at the M06-2X/6-311++G(3df,2p) level. ....                                         | 16 |
| Table S6. Atomic Coordinates for the <i>gauche</i> and <i>anti</i> conformers of XSSX molecules obtained at the M06-2X/6-311++G(3df,2p) level. ....                                         | 16 |
| Table S7. Benchmarking study of methods/functionals (left) and basis sets (right) with respect to the CCSD(T)/CBS level. Mean absolute deviations are given in kcal mol <sup>-1</sup> ..... | 18 |
| Table S8. Geometrical parameters of the XCH <sub>2</sub> CH <sub>2</sub> X systems obtained in the M06-2X/6-311++G(3df,2p) level, distances are given in Å and angles in degrees. ....      | 19 |
| Table S9. Geometrical parameters of the XBH <sub>2</sub> NH <sub>2</sub> X systems obtained in the M06-2X/6-311++G(3df,2p) level, distances are given in Å and angles in degrees. ....      | 20 |

|                                                                                                                                                                          |    |
|--------------------------------------------------------------------------------------------------------------------------------------------------------------------------|----|
| Table S10. Geometrical parameters of the XCH <sub>2</sub> OX systems obtained in the M06-2X/6-311++G(3df,2p) level, distances are given in Å and angles in degrees. .... | 21 |
| Table S11. Geometrical parameters of the XCH <sub>2</sub> SX systems obtained in the M06-2X/6-311++G(3df,2p) level, distances are given in Å and angles in degrees. .... | 22 |
| Table S12. Geometrical parameters of the XOOX systems obtained in the M06-2X/6-311++G(3df,2p) level, distances are given in Å and angles in degrees. ....                | 23 |
| Table S13. Geometrical parameters of the XSSX systems obtained in the M06-2X/6-311++G(3df,2p) level, distances are given in Å and angles in degrees. ....                | 24 |
| Figure S1. Potential energy curves for XCH <sub>2</sub> CH <sub>2</sub> X molecules calculated at the M06-2X/6-311++G(3df,2p) level. ....                                | 25 |
| Figure S2. Potential energy curves for XBH <sub>2</sub> NH <sub>2</sub> X molecules calculated at the M06-2X/6-311++G(3df,2p) level. ....                                | 26 |
| Figure S3. Potential energy curves for XCH <sub>2</sub> OX molecules calculated at the M06-2X/6-311++G(3df,2p) level. ....                                               | 27 |
| Figure S4. Potential energy curves for XCH <sub>2</sub> SX molecules calculated at the M06-2X/6-311++G(3df,2p) level. ....                                               | 28 |
| Figure S5. Potential energy curves for XOOX molecules calculated at the M06-2X/6-311++G(3df,2p) level. ....                                                              | 29 |
| Figure S6. Potential energy curves for XSSX molecules calculated at the M06-2X/6-311++G(3df,2p) level. ....                                                              | 30 |
| Figure S7. NBO deletion analysis calculated for FCH <sub>2</sub> CH <sub>2</sub> F at the M06-2X/6-311++G(3df,2p) level. ....                                            | 31 |
| Figure S8. NBO deletion analysis calculated for ClCH <sub>2</sub> CH <sub>2</sub> Cl at the M06-2X/6-311++G(3df,2p) level. ....                                          | 32 |
| Figure S9. NBO deletion analysis calculated for BrCH <sub>2</sub> CH <sub>2</sub> Br at the M06-2X/6-311++G(3df,2p) level. ....                                          | 33 |
| Figure S10. NBO deletion analysis calculated for FBH <sub>2</sub> NH <sub>2</sub> F at the M06-2X/6-311++G(3df,2p) level. ....                                           | 34 |
| Figure S11. NBO deletion analysis calculated for ClBH <sub>2</sub> NH <sub>2</sub> Cl at the M06-2X/6-311++G(3df,2p) level. ....                                         | 35 |

|                                                                                                                                                                  |    |
|------------------------------------------------------------------------------------------------------------------------------------------------------------------|----|
| Figure S12. NBO deletion analysis calculated for $\text{BrBH}_2\text{NH}_2\text{Br}$ at the M06-2X/6-311++G(3df,2p) level. ....                                  | 36 |
| Figure S13. NBO deletion analysis calculated for $\text{FCH}_2\text{OF}$ at the M06-2X/6-311++G(3df,2p) level. ....                                              | 37 |
| Figure S14. NBO deletion analysis calculated for $\text{ClCH}_2\text{OCl}$ at the M06-2X/6-311++G(3df,2p) level. ....                                            | 38 |
| Figure S15. NBO deletion analysis calculated for $\text{BrCH}_2\text{OBr}$ at the M06-2X/6-311++G(3df,2p) level. ....                                            | 39 |
| Figure S16. NBO deletion analysis calculated for $\text{FCH}_2\text{SF}$ at the M06-2X/6-311++G(3df,2p) level. ....                                              | 40 |
| Figure S17. NBO deletion analysis calculated for $\text{ClCH}_2\text{SCl}$ at the M06-2X/6-311++G(3df,2p) level. ....                                            | 41 |
| Figure S18. NBO deletion analysis calculated for $\text{BrCH}_2\text{SBr}$ at the M06-2X/6-311++G(3df,2p) level. ....                                            | 42 |
| Figure S19. NBO deletion analysis calculated for $\text{FOOF}$ at the M06-2X/6-311++G(3df,2p) level. ....                                                        | 43 |
| Figure S20. NBO deletion analysis calculated for $\text{ClOOCl}$ at the M06-2X/6-311++G(3df,2p) level. ....                                                      | 44 |
| Figure S21. NBO deletion analysis calculated for $\text{BrOOBr}$ at the M06-2X/6-311++G(3df,2p) level. ....                                                      | 45 |
| Figure S22. NBO deletion analysis calculated for $\text{FSSF}$ at the M06-2X/6-311++G(3df,2p) level. ....                                                        | 46 |
| Figure S23. NBO deletion analysis calculated for $\text{ClSSCl}$ at the M06-2X/6-311++G(3df,2p) level. ....                                                      | 47 |
| Figure S24. NBO deletion analysis calculated for $\text{BrSSBr}$ at the M06-2X/6-311++G(3df,2p) level. ....                                                      | 48 |
| Figure S25. Hyperconjugation interaction energies for $\text{FCH}_2\text{CH}_2\text{F}$ obtained at the M06-2X/6-311++G(3df,2p) level using NBO analysis. ....   | 49 |
| Figure S26. Hyperconjugation interaction energies for $\text{ClCH}_2\text{CH}_2\text{Cl}$ obtained at the M06-2X/6-311++G(3df,2p) level using NBO analysis. .... | 50 |
| Figure S27. Hyperconjugation interaction energies for $\text{BrCH}_2\text{CH}_2\text{Br}$ obtained at the M06-2X/6-311++G(3df,2p) level using NBO analysis. .... | 51 |



|                                                                                                                                                                    |    |
|--------------------------------------------------------------------------------------------------------------------------------------------------------------------|----|
| Figure S28. Hyperconjugation interaction energies for $\text{FBH}_2\text{NH}_2\text{F}$ obtained at the M06-2X/6-311++G(3df,2p) level using NBO analysis.<br>..... | 52 |
| Figure S29. Hyperconjugation interaction energies for $\text{ClBH}_2\text{NH}_2\text{Cl}$ obtained at the M06-2X/6-311++G(3df,2p) level using NBO analysis. ....   | 53 |
| Figure S30. Hyperconjugation interaction energies for $\text{BrBH}_2\text{NH}_2\text{Br}$ obtained at the M06-2X/6-311++G(3df,2p) level using NBO analysis. ....   | 54 |
| Figure S31. Hyperconjugation interaction energies for $\text{FCH}_2\text{OF}$ obtained at the M06-2X/6-311++G(3df,2p) level using NBO analysis.<br>.....           | 55 |
| Figure S32. Hyperconjugation interaction energies for $\text{ClCH}_2\text{OCl}$ obtained at the M06-2X/6-311++G(3df,2p) level using NBO analysis.<br>.....         | 56 |
| Figure S33. Hyperconjugation interaction energies for $\text{BrCH}_2\text{OBr}$ obtained at the M06-2X/6-311++G(3df,2p) level using NBO analysis.<br>.....         | 57 |
| Figure S34. Hyperconjugation interaction energies for $\text{FCH}_2\text{SF}$ obtained at the M06-2X/6-311++G(3df,2p) level using NBO analysis.<br>.....           | 58 |
| Figure S35. Hyperconjugation interaction energies for $\text{ClCH}_2\text{SCl}$ obtained at the M06-2X/6-311++G(3df,2p) level using NBO analysis.<br>.....         | 59 |
| Figure S36. Hyperconjugation interaction energies for $\text{BrCH}_2\text{SBr}$ obtained at the M06-2X/6-311++G(3df,2p) level using NBO analysis.<br>.....         | 60 |
| Figure S37. Hyperconjugation interaction energies for $\text{FOOF}$ obtained at the M06-2X/6-311++G(3df,2p) level using NBO analysis..                             | 61 |

|                                                                                                                                                                                 |    |
|---------------------------------------------------------------------------------------------------------------------------------------------------------------------------------|----|
| Figure S38. Hyperconjugation interaction energies for ClOOCl obtained at the M06-2X/6-311++G(3df,2p) level using NBO analysis.<br>.....                                         | 62 |
| Figure S39. Hyperconjugation interaction energies for BrOOBr obtained at the M06-2X/6-311++G(3df,2p) level using NBO analysis.<br>.....                                         | 63 |
| Figure S40. Hyperconjugation interaction energies for FSSF obtained at the M06-2X/6-311++G(3df,2p) level using NBO analysis. ...                                                | 64 |
| Figure S41. Hyperconjugation interaction energies for ClSSCl obtained at the M06-2X/6-311++G(3df,2p) level using NBO analysis.<br>.....                                         | 65 |
| Figure S42. Hyperconjugation interaction energies for BrSSBr obtained at the M06-2X/6-311++G(3df,2p) level using NBO analysis.<br>.....                                         | 66 |
| Figure S43. Atomic charges and natural Coulomb electrostatic (NCE) energy curves for FCH <sub>2</sub> CH <sub>2</sub> F calculated at the M06-2X/6-311++G(3df,2p) level. ....   | 67 |
| Figure S44. Atomic charges and natural Coulomb electrostatic (NCE) energy curves for ClCH <sub>2</sub> CH <sub>2</sub> Cl calculated at the M06-2X/6-311++G(3df,2p) level. .... | 68 |
| Figure S45. Atomic charges and natural Coulomb electrostatic (NCE) energy curves for BrCH <sub>2</sub> CH <sub>2</sub> Br calculated at the M06-2X/6-311++G(3df,2p) level. .... | 69 |
| Figure S46. Atomic charges and natural Coulomb electrostatic (NCE) energy curves for FBH <sub>2</sub> NH <sub>2</sub> F calculated at the M06-2X/6-311++G(3df,2p) level. ....   | 70 |
| Figure S47. Atomic charges and natural Coulomb electrostatic (NCE) energy curves for ClBH <sub>2</sub> NH <sub>2</sub> Cl calculated at the M06-2X/6-311++G(3df,2p) level. .... | 71 |

|                                                                                                                                                                                |    |
|--------------------------------------------------------------------------------------------------------------------------------------------------------------------------------|----|
| Figure S48. Atomic charges and natural Coulomb electrostatic (NCE) energy curves for $\text{BrBH}_2\text{NH}_2\text{Br}$ calculated at the M06-2X/6-311++G(3df,2p) level. .... | 72 |
| Figure S49. Atomic charges and natural Coulomb electrostatic (NCE) energy curves for $\text{FCH}_2\text{OF}$ calculated at the M06-2X/6-311++G(3df,2p) level. ....             | 73 |
| Figure S50. Atomic charges and natural Coulomb electrostatic (NCE) energy curves for $\text{ClCH}_2\text{OCl}$ calculated at the M06-2X/6-311++G(3df,2p) level. ....           | 74 |
| Figure S51. Atomic charges and natural Coulomb electrostatic (NCE) energy curves for $\text{BrCH}_2\text{OBr}$ calculated at the M06-2X/6-311++G(3df,2p) level. ....           | 75 |
| Figure S52. Atomic charges and natural Coulomb electrostatic (NCE) energy curves for $\text{FCH}_2\text{SF}$ calculated at the M06-2X/6-311++G(3df,2p) level. ....             | 76 |
| Figure S53. Atomic charges and natural Coulomb electrostatic (NCE) energy curves for $\text{ClCH}_2\text{SCl}$ calculated at the M06-2X/6-311++G(3df,2p) level. ....           | 77 |
| Figure S54. Atomic charges and natural Coulomb electrostatic (NCE) energy curves for $\text{BrCH}_2\text{SBr}$ calculated at the M06-2X/6-311++G(3df,2p) level. ....           | 78 |
| Figure S55. Atomic charges and natural Coulomb electrostatic (NCE) energy curves for $\text{FOOF}$ calculated at the M06-2X/6-311++G(3df,2p) level. ....                       | 79 |
| Figure S56. Atomic charges and natural Coulomb electrostatic (NCE) energy curves for $\text{ClOOCl}$ calculated at the M06-2X/6-311++G(3df,2p) level. ....                     | 80 |
| Figure S57. Atomic charges and natural Coulomb electrostatic (NCE) energy curves for $\text{BrOOBr}$ calculated at the M06-2X/6-311++G(3df,2p) level. ....                     | 81 |

|                                                                                                                                                                                                                                                                                                                                                                                                                                                                                      |    |
|--------------------------------------------------------------------------------------------------------------------------------------------------------------------------------------------------------------------------------------------------------------------------------------------------------------------------------------------------------------------------------------------------------------------------------------------------------------------------------------|----|
| Figure S58. Atomic charges and natural Coulomb electrostatic (NCE) energy curves for FSSF calculated at the M06-2X/6-311++G(3df,2p) level. ....                                                                                                                                                                                                                                                                                                                                      | 82 |
| Figure S59. Atomic charges and natural Coulomb electrostatic (NCE) energy curves for ClSSCl calculated at the M06-2X/6-311++G(3df,2p) level. ....                                                                                                                                                                                                                                                                                                                                    | 83 |
| Figure S60. Atomic charges and natural Coulomb electrostatic (NCE) energy curves for BrSSBr calculated at the M06-2X/6-311++G(3df,2p) level. ....                                                                                                                                                                                                                                                                                                                                    | 84 |
| Figure S61. a) $\sigma_{\text{CH}} \rightarrow \sigma_{\text{CF}}^*$ and b) $\text{LP}(2)\text{F} \rightarrow \sigma_{\text{CH}}^*$ hyperconjugative interaction representations for the <i>gauche</i> and c) $\text{LP}(2)\text{F} \rightarrow \sigma_{\text{CH}}^*$ hyperconjugative interaction for the <i>anti</i> conformer of $\text{FCH}_2\text{CH}_2\text{F}$ . All orbital isosurfaces were plotted with isovalues of 0.07 au. ....                                         | 85 |
| Figure S62. a) $\sigma_{\text{CF}} \rightarrow \sigma_{\text{CF}}^*$ , b) $\sigma_{\text{CCl}} \rightarrow \sigma_{\text{CCl}}^*$ and c) $\sigma_{\text{CBr}} \rightarrow \sigma_{\text{CBr}}^*$ hyperconjugative interaction representations for the <i>anti</i> conformers of $\text{FCH}_2\text{CH}_2\text{F}$ , $\text{ClCH}_2\text{CH}_2\text{Cl}$ and $\text{BrCH}_2\text{CH}_2\text{Br}$ , respectively. All orbital isosurfaces were plotted with isovalues of 0.07 au. .... | 86 |
| Figure S63. a) $\text{LP}(2)\text{O} \rightarrow \sigma_{\text{CF}}^*$ b) $\sigma_{\text{CH}} \rightarrow \sigma_{\text{OF}}^*$ hyperconjugative interactions for the <i>gauche</i> conformer of $\text{FCH}_2\text{OF}$ and c) $\text{LP}(2)\text{O} \rightarrow \sigma_{\text{OF}}^*$ for the <i>gauche</i> conformer of $\text{FOOF}$ . All orbital isosurfaces were plotted with isovalues of 0.07 a.u. ....                                                                     | 87 |
| Figure S64. Number of remaining hyperconjugative interactions and the amplitude of the “Others” curve <i>versus</i> the cutoff value for the decomposition of hyperconjugative interactions and electrostatics interactions for $\text{XCH}_2\text{CH}_2\text{X}$ molecules. ....                                                                                                                                                                                                    | 88 |
| Figure S65. Number of remaining hyperconjugative interactions and the amplitude of the “Others” curve <i>versus</i> the cutoff value for the decomposition of hyperconjugative interactions and electrostatics interactions for $\text{XBH}_2\text{NH}_2\text{X}$ molecules. ....                                                                                                                                                                                                    | 89 |
| Figure S66. Number of remaining hyperconjugative interactions and the amplitude of the “Others” curve <i>versus</i> the cutoff value for the decomposition of hyperconjugative interactions and electrostatics interactions for $\text{XCH}_2\text{OX}$ molecules. ....                                                                                                                                                                                                              | 90 |
| Figure S67. Number of remaining hyperconjugative interactions and the amplitude of the “Others” curve <i>versus</i> the cutoff value for the decomposition of hyperconjugative interactions and electrostatics interactions for $\text{XOOX}$ molecules. ....                                                                                                                                                                                                                        | 91 |

Figure S68. Number of remaining hyperconjugative interactions and the amplitude of the “Others” curve *versus* the cutoff value for the decomposition of hyperconjugative interactions and electrostatics interactions for XCH<sub>2</sub>SX molecules. ....92

Figure S69. Number of remaining hyperconjugative interactions and the amplitude of the “Others” curve *versus* the cutoff value for the decomposition of hyperconjugative interactions and electrostatics interactions for XSSX molecules. ....93

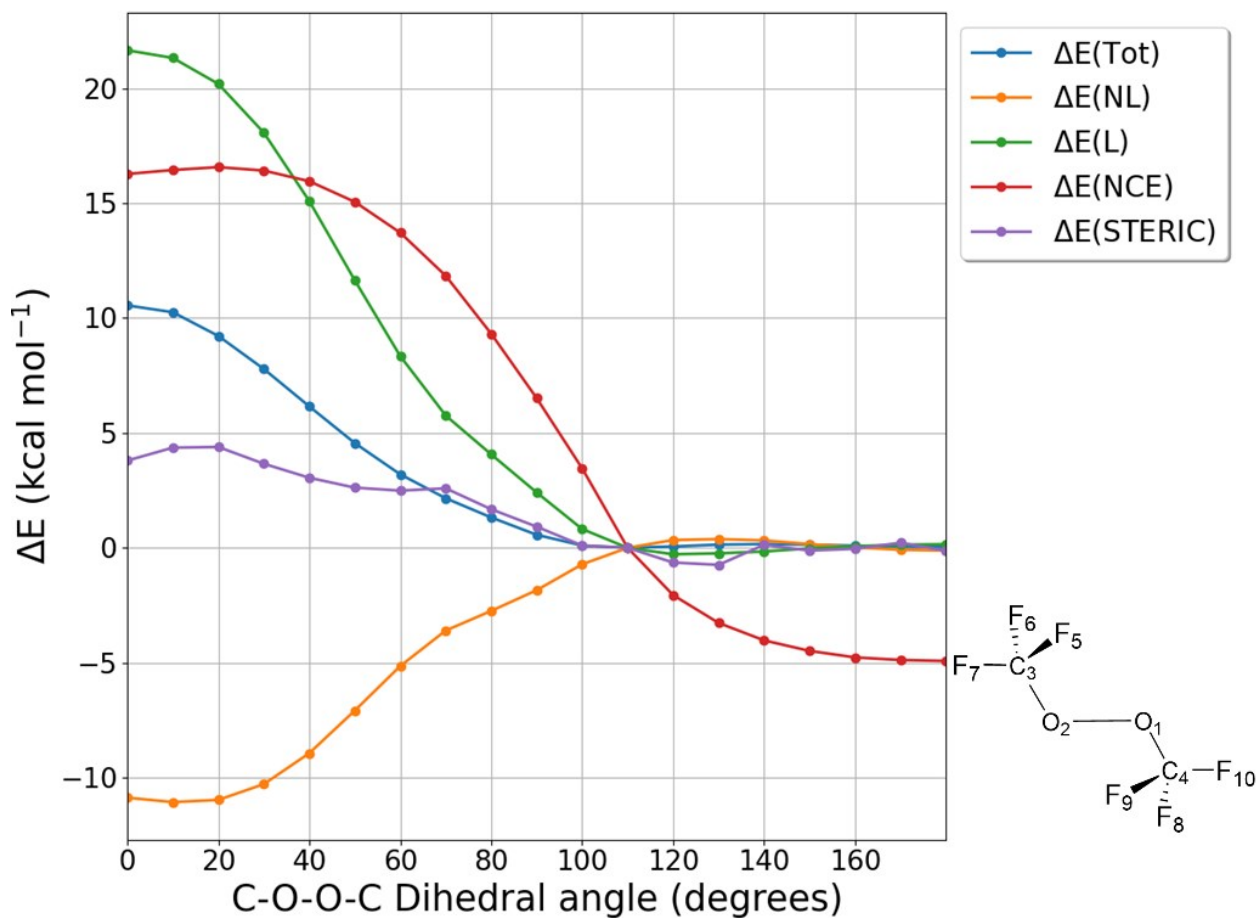

.....94

|                                                                                                                                                                       |    |
|-----------------------------------------------------------------------------------------------------------------------------------------------------------------------|----|
| Figure S70. NBO deletion analysis calculated for $\text{CF}_3\text{OOCF}_3$ at the M06-2X/6-311++G(3df,2p) level .....                                                | 94 |
| Figure S71. Hyperconjugation interaction energies for $\text{CF}_3\text{OOCF}_3$ obtained at the M06-2X/6-311++G(3df,2p) level using NBO analysis.<br>.....           | 95 |
| Figure S72. Atomic charges and natural Coulomb electrostatic (NCE) energy curves for $\text{CF}_3\text{OOCF}_3$ calculated at the M06-2X/6-311++G(3df,2p) level. .... | 96 |

## Computational Details

All optimization, frequency and energy calculations were done using the Gaussian16 Rev C.01 software.<sup>24</sup> To determine the most accurate level of theory, the F-C-C-F dihedral angle was scanned from 0 to 180° in 10° increments in the M06-2X/6-311+G(d) level for **DFE**. On the obtained geometries, single point calculations were performed using several DFT functionals and *ab initio* methods as well as several basis sets. The energies of all resulting geometries from the scan calculations were then compared to that obtained from the CCSD(T)/CBS level of theory. The M06-2X/6-311++G(3df,2p) level the one that showed the lowest mean absolute deviations and was used in all further calculations. Natural Bond Orbitals analysis calculations were run at the M06-2X/6-311++G(3df,2p) level using the NBO 7.0 program.<sup>25</sup> Likewise, NBOdel analysis was done by excluding all Rydberg and non-Lewis orbitals. The Natural Coulomb Electrostatic analysis (NCE)<sup>10</sup> was carried out for the optimized geometries for the classical Coulomb

equation:  $E_{AB} = \frac{Q_A Q_B}{R_{AB}}$ , where ( $R_{AB}$ ) are the optimized interatomic distances and ( $Q_A, Q_B$ ) are NPA atomic charges. The Natural Steric Analysis (NSA)<sup>21</sup> was done using the STERIC keyword in the NBO 7.0 software. All the individual hyperconjugative interactions were obtained setting the threshold for printing an interaction to 0.0 kcal mol<sup>-1</sup> in the NBO 7.0 program.

**Table S1. Atomic Coordinates for the *gauche* and *anti* conformers of XCH<sub>2</sub>CH<sub>2</sub>X molecules obtained at the M06-2X/6-311++G(3df,2p) level.**

|                                      |    | <i>gauche</i> |         |         | <i>anti</i> |         |         |         |
|--------------------------------------|----|---------------|---------|---------|-------------|---------|---------|---------|
| FCH <sub>2</sub> CH <sub>2</sub> F   | C  | -0.2641       | 0.70313 | -0.5121 | C           | 0.42346 | -0.6274 | -8E-06  |
|                                      | H  | 0.02156       | 1.20849 | -1.4374 | H           | 1.05097 | -0.6713 | -0.8909 |
|                                      | H  | -1.3506       | 0.70298 | -0.4109 | H           | 1.05046 | -0.6724 | 0.89107 |
|                                      | C  | 0.26414       | -0.7031 | -0.5121 | C           | -0.4235 | 0.62735 | -8E-06  |
|                                      | H  | -0.0216       | -1.2085 | -1.4374 | H           | -1.051  | 0.67131 | -0.8909 |
|                                      | H  | 1.35063       | -0.703  | -0.4109 | H           | -1.0505 | 0.67237 | 0.89107 |
|                                      | F  | -0.2641       | -1.4052 | 0.54677 | F           | 0.42346 | 1.71347 | -1E-05  |
|                                      | F  | 0.26414       | 1.40521 | 0.54677 | F           | -0.4235 | -1.7135 | -1E-05  |
| ClCH <sub>2</sub> CH <sub>2</sub> Cl | C  | 0.64737       | 0.88604 | 0.38762 | C           | 0.4892  | 0.57607 | -3E-05  |
|                                      | H  | 0.46602       | 0.8037  | 1.45567 | H           | 0.37421 | 1.19087 | 0.88797 |
|                                      | H  | 1.19405       | 1.80352 | 0.17872 | H           | 0.37416 | 1.18995 | -0.8886 |
|                                      | C  | -0.6473       | 0.88609 | -0.3876 | C           | -0.489  | -0.5759 | 2.9E-05 |
|                                      | H  | -1.1939       | 1.8036  | -0.1787 | H           | -0.3738 | -1.1907 | -0.8879 |
|                                      | H  | -0.4659       | 0.80377 | -1.4556 | H           | -0.3738 | -1.1896 | 0.88862 |
|                                      | Cl | -1.7049       | -0.4661 | 0.08271 | Cl          | -2.1521 | 0.07049 | -1E-05  |
|                                      | Cl | 1.70485       | -0.4661 | -0.0827 | Cl          | 2.15197 | -0.0706 | 5E-06   |
| BrCH <sub>2</sub> CH <sub>2</sub> Br | C  | 0.6315        | 1.17723 | 0.41451 | C           | 0.46003 | 0.59638 | -2E-06  |
|                                      | H  | 0.41738       | 1.09259 | 1.47544 | H           | 0.33902 | 1.20488 | 0.88972 |
|                                      | H  | 1.19616       | 2.08646 | 0.22127 | H           | 0.33876 | 1.20438 | -0.89   |
|                                      | C  | -0.6279       | 1.1776  | -0.4144 | C           | -0.4601 | -0.5963 | 1.3E-05 |
|                                      | H  | -1.1939       | 2.08577 | -0.2224 | H           | -0.3386 | -1.2045 | -0.8898 |
|                                      | H  | -0.4163       | 1.09142 | -1.4754 | H           | -0.3388 | -1.2046 | 0.88983 |
|                                      | Br | -1.8141       | -0.2923 | 0.03854 | Br          | -2.3068 | 0.03049 | 3E-06   |
|                                      | Br | 1.81334       | -0.293  | -0.0385 | Br          | 2.30681 | -0.0305 | 3E-06   |



**Table S2. Atomic Coordinates for the *gauche* and *anti* conformers of XBH<sub>2</sub>NH<sub>2</sub>X molecules obtained at the M06-2X/6-311++G(3df,2p) level.**

|                                      | <i>gauche</i> |         |         |         | <i>anti</i> |         |         |         |
|--------------------------------------|---------------|---------|---------|---------|-------------|---------|---------|---------|
| FBH <sub>2</sub> NH <sub>2</sub> F   | B             | -0.8479 | 0.5436  | -0.3533 | B           | -0.7293 | 0.66927 | -2E-05  |
|                                      | H             | -1.2061 | 1.60125 | 0.12499 | H           | -0.5954 | 1.28378 | 1.02241 |
|                                      | H             | -0.6801 | 0.55065 | -1.5425 | H           | -0.5954 | 1.28355 | -1.0225 |
|                                      | N             | 0.65542 | 0.48265 | 0.28934 | N           | 0.53769 | -0.4197 | 3E-06   |
|                                      | H             | 0.60414 | 0.31504 | 1.2958  | H           | 0.5041  | -1.0124 | -0.8303 |
|                                      | H             | 1.17212 | 1.34333 | 0.10971 | H           | 0.50391 | -1.012  | 0.83062 |
|                                      | F             | 1.45936 | -0.5315 | -0.1887 | F           | 1.78097 | 0.15261 | -9E-06  |
|                                      | F             | -1.4859 | -0.5692 | 0.16128 | F           | -1.7737 | -0.2583 | 1E-06   |
| ClBH <sub>2</sub> NH <sub>2</sub> Cl | B             | 0.73555 | 0.98046 | 0.45134 | B           | 0.5675  | 0.82227 | 0.00111 |
|                                      | H             | 0.44759 | 0.97157 | 1.60748 | H           | 0.38429 | 1.4116  | 1.01989 |
|                                      | H             | 1.16211 | 2.01533 | 0.01778 | H           | 0.38226 | 1.41179 | -1.0172 |
|                                      | N             | -0.6581 | 0.82792 | -0.3782 | N           | -0.4799 | -0.4312 | 0.00186 |
|                                      | H             | -0.4414 | 0.67448 | -1.3632 | H           | -0.3182 | -1.01   | 0.826   |
|                                      | H             | -1.2064 | 1.68237 | -0.2914 | H           | -0.3162 | -1.012  | -0.8204 |
|                                      | Cl            | -1.6931 | -0.4755 | 0.0996  | Cl          | -2.1487 | 0.01894 | -0.0008 |
|                                      | Cl            | 1.75    | -0.4681 | -0.0749 | Cl          | 2.17156 | -0.1304 | -0.0007 |
| BrBH <sub>2</sub> NH <sub>2</sub> Br | B             | 0.68826 | 1.28326 | 0.48548 | B           | 0.51355 | 0.89428 | 0.00128 |
|                                      | H             | 0.37167 | 1.25604 | 1.63123 | H           | 0.33362 | 1.47661 | 1.02194 |
|                                      | H             | 1.15363 | 2.30713 | 0.07389 | H           | 0.33197 | 1.47569 | -1.0191 |
|                                      | N             | -0.6534 | 1.12397 | -0.4039 | N           | -0.4526 | -0.4016 | 0.00252 |
|                                      | H             | -0.3973 | 0.97591 | -1.3802 | H           | -0.2719 | -0.9756 | 0.8253  |
|                                      | H             | -1.2144 | 1.97192 | -0.3396 | H           | -0.27   | -0.9784 | -0.8179 |
|                                      | Br            | -1.808  | -0.3029 | 0.04645 | Br          | -2.3037 | -0.0067 | -0.0005 |
|                                      | Br            | 1.84286 | -0.2913 | -0.0346 | Br          | 2.3173  | -0.0693 | -0.0005 |

**Table S3. Atomic Coordinates for the *gauche* and *anti* conformers of XCH<sub>2</sub>OX molecules obtained at the M06-2X/6-311++G(3df,2p) level.**

|                       | <i>gauche</i> |         |         | <i>anti</i> |    |         |         |         |
|-----------------------|---------------|---------|---------|-------------|----|---------|---------|---------|
| FCH <sub>2</sub> OF   | O             | -0.6073 | 0.58732 | -0.3521     | O  | -0.4634 | -0.5711 | 0.00036 |
|                       | C             | 0.61104 | 0.49803 | 0.2875      | C  | 0.49286 | 0.47659 | 0.0003  |
|                       | H             | 0.47768 | 0.39622 | 1.36448     | H  | 0.38842 | 1.07041 | 0.90892 |
|                       | H             | 1.11373 | 1.42457 | 0.00487     | H  | 0.38791 | 1.071   | -0.9078 |
|                       | F             | 1.32053 | -0.5679 | -0.1572     | F  | 1.6725  | -0.1687 | -0.0003 |
|                       | F             | -1.3649 | -0.4885 | 0.12643     | F  | -1.6754 | 0.12063 | -0.0003 |
| ClCH <sub>2</sub> OCl | O             | -0.6392 | 0.83731 | -0.4185     | O  | -0.4469 | -0.5343 | 0.00115 |
|                       | C             | 0.54181 | 0.89842 | 0.30664     | C  | 0.42919 | 0.57275 | 0.00071 |
|                       | H             | 0.36192 | 0.87542 | 1.37883     | H  | 0.29921 | 1.16917 | 0.90182 |
|                       | H             | 1.02057 | 1.82031 | -0.0108     | H  | 0.29805 | 1.1695  | -0.9    |
|                       | Cl            | 1.65403 | -0.4457 | -0.0609     | Cl | 2.05271 | -0.1027 | -0.0004 |
|                       | Cl            | -1.6258 | -0.424  | 0.06917     | Cl | -2.029  | 0.01445 | -0.0005 |
| BrCH <sub>2</sub> OBr | O             | -0.6481 | 1.09948 | -0.4362     | O  | -0.4334 | -0.5108 | 0.00152 |
|                       | C             | 0.50197 | 1.1789  | 0.31959     | C  | 0.39579 | 0.62035 | 0.00088 |
|                       | H             | 0.31245 | 1.1487  | 1.38929     | H  | 0.27037 | 1.21586 | 0.90234 |
|                       | H             | 0.99831 | 2.09454 | 0.01227     | H  | 0.26926 | 1.21577 | -0.9004 |
|                       | Br            | 1.77106 | -0.2736 | -0.0274     | Br | 2.20242 | -0.0548 | -0.0003 |
|                       | Br            | -1.7464 | -0.2725 | 0.03227     | Br | -2.1866 | -0.0042 | -0.0003 |

**Table S4. Atomic Coordinates for the *gauche* and *anti* conformers of XCH<sub>2</sub>SX molecules molecules obtained at the M06-2X/6-311++G(3df,2p) level.**

|                       |    | <i>gauche</i> |         |         | <i>anti</i> |         |         |         |
|-----------------------|----|---------------|---------|---------|-------------|---------|---------|---------|
| FCH <sub>2</sub> SF   | S  | 0.68524       | -0.58   | -0.1841 | S           | 0.53684 | -0.6    | -0.0002 |
|                       | C  | -0.9131       | -0.2579 | 0.4906  | C           | -0.8134 | 0.61227 | -0.0005 |
|                       | H  | -0.8018       | 0.29366 | 1.42364 | H           | -0.7673 | 1.22258 | -0.9006 |
|                       | H  | -1.3565       | -1.2396 | 0.6731  | H           | -0.7662 | 1.22375 | 0.89874 |
|                       | F  | -1.7349       | 0.45065 | -0.3448 | F           | -1.9637 | -0.1213 | 0.00052 |
|                       | F  | 1.36523       | 0.85751 | 0.11211 | F           | 1.72204 | 0.50804 | 0.00039 |
| ClCH <sub>2</sub> SCl | S  | -0.7067       | 0.9806  | -0.2737 | S           | -0.4379 | 0.73912 | -0.0009 |
|                       | C  | 0.82574       | 0.69038 | 0.58897 | C           | 0.66804 | -0.6881 | -0.0022 |
|                       | H  | 0.63036       | 0.36472 | 1.60557 | H           | 0.5293  | -1.2798 | -0.9013 |
|                       | H  | 1.335         | 1.65266 | 0.5914  | H           | 0.52693 | -1.283  | 0.89452 |
|                       | Cl | 1.89885       | -0.5088 | -0.1667 | Cl          | 2.3089  | -0.0258 | 0.00107 |
|                       | Cl | -1.6407       | -0.7764 | 0.0872  | Cl          | -2.1946 | -0.2762 | 0.0009  |
| BrCH <sub>2</sub> SBr | S  | -0.6991       | 1.33471 | -0.3051 | S           | -0.4106 | 0.81874 | -0.0012 |
|                       | C  | 0.77195       | 1.00722 | 0.63994 | C           | 0.60432 | -0.6665 | -0.0029 |
|                       | H  | 0.53176       | 0.71096 | 1.65456 | H           | 0.45382 | -1.2512 | -0.9036 |
|                       | H  | 1.32668       | 1.94281 | 0.63631 | H           | 0.45147 | -1.2549 | 0.895   |
|                       | Br | 1.95591       | -0.3588 | -0.0785 | Br          | 2.43425 | -0.04   | 0.00068 |
|                       | Br | -1.8218       | -0.4998 | 0.04281 | Br          | -2.376  | -0.1484 | 0.00059 |

**Table S5. Atomic Coordinates for the *gauche* and *anti* conformers of XOOX molecules obtained at the M06-2X/6-311++G(3df,2p) level.**

|        |    | <i>gauche</i> |         |         | <i>anti</i> |         |         |         |  |
|--------|----|---------------|---------|---------|-------------|---------|---------|---------|--|
| FOOF   | O  | -0.2948       | -0.5734 | 0.54923 | O           | -0.452  | -0.5557 | 0       |  |
|        | O  | 0.29478       | 0.57339 | 0.54923 | O           | 0.45196 | 0.55566 | 0       |  |
|        | F  | 0.29478       | -1.3305 | -0.4882 | F           | 0.45196 | -1.5822 | 0       |  |
|        | F  | -0.2948       | 1.33054 | -0.4882 | F           | -0.452  | 1.58215 | 0       |  |
| ClOOCl | O  | 0.55386       | 0.82551 | 0.40996 | O           | 0.43851 | -0.5785 | -0.0004 |  |
|        | O  | -0.5539       | 0.82552 | -0.41   | O           | -0.4385 | 0.57845 | -0.0004 |  |
|        | Cl | 1.62461       | -0.3885 | -0.0658 | Cl          | 1.96601 | 0.06072 | 0.00018 |  |
|        | Cl | -1.6246       | -0.3885 | 0.06577 | Cl          | -1.966  | -0.0607 | 0.00018 |  |
| BrOOBr | O  | 0.53594       | 1.07271 | 0.42555 | O           | 0.41168 | -0.5926 | -0.0005 |  |
|        | O  | -0.5359       | 1.07271 | -0.4255 | O           | -0.4117 | 0.59261 | -0.0005 |  |
|        | Br | 1.74194       | -0.2452 | -0.0299 | Br          | 2.11199 | 0.0264  | 0.00012 |  |
|        | Br | -1.7419       | -0.2452 | 0.02993 | Br          | -2.112  | -0.0264 | 0.00012 |  |

**Table S6. Atomic Coordinates for the *gauche* and *anti* conformers of XSSX molecules obtained at the M06-2X/6-311++G(3df,2p) level.**

|      |   | <i>gauche</i> |         |         | <i>anti</i> |         |         |         |  |
|------|---|---------------|---------|---------|-------------|---------|---------|---------|--|
| FSSF | S | -0.8143       | 0.67388 | -0.0003 | S           | -0.8529 | -0.3951 | 0.41739 |  |

|        |    |         |         |         |    |         |         |         |
|--------|----|---------|---------|---------|----|---------|---------|---------|
|        | S  | 0.81434 | -0.6739 | -0.0003 | S  | 0.85288 | -0.3952 | -0.4174 |
|        | F  | -1.9096 | -0.5109 | 0.00061 | F  | -1.769  | 0.70249 | -0.3578 |
|        | F  | 1.90963 | 0.51089 | 0.00061 | F  | 1.76902 | 0.7025  | 0.35774 |
| ClSSCl | S  | -0.8196 | -0.776  | 0.53356 | S  | 0.00012 | -1.0519 | 0       |
|        | S  | 0.82016 | -0.775  | -0.5339 | S  | 0       | 1.05163 | 0       |
|        | Cl | -1.999  | 0.72984 | -0.2059 | Cl | -2.0077 | -1.2413 | 0       |
|        | Cl | 1.99843 | 0.72987 | 0.20622 | Cl | 2.00758 | 1.2416  | 0       |
| BrSSBr | S  | 0.78124 | 1.11286 | 0.59081 | S  | 0       | 1.04974 | 0       |
|        | S  | -0.7811 | 1.11273 | -0.5909 | S  | -5E-06  | -1.05   | 0       |
|        | Br | 2.12416 | -0.5087 | -0.0993 | Br | 2.16626 | 1.25868 | 0       |
|        | Br | -2.1242 | -0.5087 | 0.09934 | Br | -2.1663 | -1.2585 | 0       |

**Table S7. Benchmarking study of methods/functionals (left) and basis sets (right) with respect to the CCSD(T)/CBS level. Mean absolute deviations are given in kcal mol<sup>-1</sup>**

| Method               | MAD    | Basis set               | MAD    |
|----------------------|--------|-------------------------|--------|
| B3LYP/aug-cc-pVTZ    | 0.1035 | M06-2X/6-311++G(3df,2p) | 0.0314 |
| B3LYP-D3/aug-cc-pVTZ | 0.1040 | M06-2X/cc-pVDZ          | 0.2242 |
| M06/aug-cc-pVTZ      | 0.1240 | M06-2X/cc-pVTZ          | 0.0391 |
| M06L/aug-cc-pVTZ     | 0.2407 | M06-2X/cc-pVQZ          | 0.0149 |
| M06-2X/aug-cc-pVTZ   | 0.0566 | M06-2X/cc-pV5Z          | 0.0050 |
| M11/aug-cc-pVTZ      | 0.1856 | M06-2X/aug-cc-pVDZ      | 0.0640 |
| MP2/aug-cc-pVTZ      | 0.1691 | M06-2X/aug-cc-pVTZ      | 0.0633 |
| MP3/aug-cc-pVTZ      | 0.0169 | M06-2X/aug-cc-pVQZ      | 0.0149 |
| MP4(SDQ)/aug-cc-pVTZ | 0.0182 | -                       | -      |
| CCSD(T)/CBS          | 0.0000 | CCSD(T)/CBS             | 0.0000 |

**Table S8. Geometrical parameters of the XCH<sub>2</sub>CH<sub>2</sub>X systems obtained in the M06-2X/6-311++G(3df,2p) level, distances are given in Å and angles in degrees.**

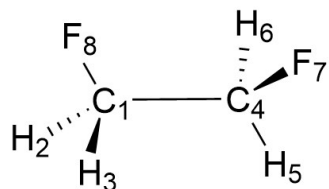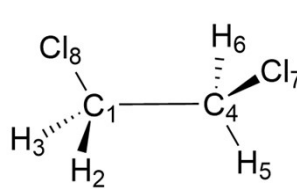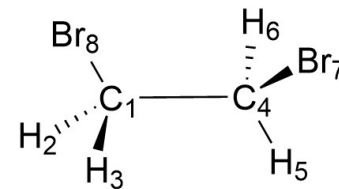

| Parameter       | <i>syn</i> | <i>gauche</i> | <i>anticlinal</i> | <i>anti</i> | <i>syn</i> | <i>gauche</i> | <i>anticlinal</i> | <i>anti</i> | <i>syn</i> | <i>gauche</i> | <i>anticlinal</i> | <i>anti</i> |
|-----------------|------------|---------------|-------------------|-------------|------------|---------------|-------------------|-------------|------------|---------------|-------------------|-------------|
| $\phi^{[a]}$    | 0          | 70            | 120               | 180         | 0          | 70            | 120               | 180         | 0          | 70            | 120               | 180         |
| $r(1-2)$        | 1.091      | 1.092         | 1.090             | 1.091       | 1.086      | 1.086         | 1.085             | 1.086       | 1.085      | 1.086         | 1.083             | 1.085       |
| $r(1-3)$        | 1.091      | 1.091         | 1.090             | 1.090       | 1.086      | 1.088         | 1.086             | 1.086       | 1.085      | 1.088         | 1.085             | 1.085       |
| $r(1-4)$        | 1.546      | 1.502         | 1.522             | 1.514       | 1.545      | 1.509         | 1.528             | 1.511       | 1.539      | 1.508         | 1.525             | 1.506       |
| $r(1-8)$        | 1.369      | 1.376         | 1.380             | 1.377       | 1.775      | 1.780         | 1.785             | 1.784       | 1.938      | 1.940         | 1.948             | 1.950       |
| $r(4-5)$        | 1.091      | 1.092         | 1.090             | 1.091       | 1.086      | 1.088         | 1.086             | 1.086       | 1.084      | 1.087         | 1.085             | 1.085       |
| $r(4-6)$        | 1.091      | 1.091         | 1.090             | 1.090       | 1.086      | 1.086         | 1.085             | 1.086       | 1.084      | 1.085         | 1.083             | 1.085       |
| $r(4-7)$        | 1.369      | 1.376         | 1.380             | 1.377       | 1.774      | 1.780         | 1.785             | 1.784       | 1.938      | 1.942         | 1.949             | 1.950       |
| $\angle(2-1-3)$ | 109.0      | 109.8         | 109.7             | 109.6       | 108.7      | 109.7         | 109.3             | 109.7       | 109.0      | 110.0         | 109.6             | 110.3       |
| $\angle(2-1-4)$ | 110.8      | 109.9         | 112.2             | 110.8       | 109.5      | 111.2         | 111.1             | 111.3       | 109.8      | 111.9         | 112.3             | 112.1       |
| $\angle(2-1-8)$ | 107.9      | 108.4         | 107.2             | 108.8       | 106.1      | 107.5         | 106.8             | 107.7       | 104.8      | 106.8         | 105.6             | 106.6       |
| $\angle(3-1-4)$ | 110.8      | 110.5         | 109.1             | 110.8       | 109.5      | 109.4         | 111.2             | 111.2       | 109.8      | 109.6         | 111.5             | 112.1       |
| $\angle(3-1-8)$ | 107.9      | 108.1         | 108.5             | 108.7       | 106.1      | 106.9         | 106.6             | 107.7       | 104.8      | 106.0         | 105.8             | 106.6       |
| $\angle(4-1-8)$ | 110.5      | 110.0         | 110.1             | 108.0       | 116.5      | 112.0         | 111.7             | 109.1       | 118.2      | 112.4         | 111.8             | 108.9       |
| $\angle(1-4-5)$ | 110.8      | 109.9         | 112.2             | 110.8       | 109.6      | 109.4         | 111.2             | 111.3       | 109.8      | 109.8         | 111.5             | 112.1       |
| $\angle(1-4-6)$ | 110.8      | 110.5         | 109.1             | 110.8       | 109.6      | 111.2         | 111.1             | 111.2       | 109.8      | 112.0         | 112.3             | 112.1       |
| $\angle(1-4-7)$ | 110.5      | 110.0         | 110.1             | 108.0       | 116.5      | 112.0         | 111.7             | 109.1       | 118.2      | 112.4         | 111.8             | 108.9       |
| $\angle(5-4-6)$ | 109.0      | 109.8         | 109.7             | 109.6       | 108.7      | 109.7         | 109.3             | 109.7       | 108.9      | 109.9         | 109.5             | 110.2       |
| $\angle(5-4-7)$ | 107.9      | 108.4         | 107.2             | 108.8       | 106.1      | 106.9         | 106.6             | 107.7       | 104.8      | 105.8         | 105.8             | 106.6       |
| $\angle(6-4-7)$ | 107.9      | 108.1         | 108.5             | 108.7       | 106.1      | 107.5         | 106.8             | 107.7       | 104.8      | 106.7         | 105.5             | 106.6       |

**Table S9. Geometrical parameters of the XBH<sub>2</sub>NH<sub>2</sub>X systems obtained in the M06-2X/6-311++G(3df,2p) level, distances are given in Å and angles in degrees.**

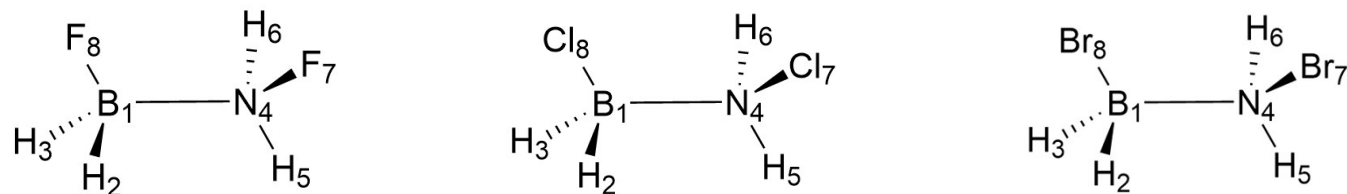

| Parameter       | F          |               |                   |             | Cl         |               |                   |             | Br         |               |                   |             |
|-----------------|------------|---------------|-------------------|-------------|------------|---------------|-------------------|-------------|------------|---------------|-------------------|-------------|
|                 | <i>syn</i> | <i>gauche</i> | <i>anticlinal</i> | <i>anti</i> | <i>syn</i> | <i>gauche</i> | <i>anticlinal</i> | <i>anti</i> | <i>syn</i> | <i>gauche</i> | <i>anticlinal</i> | <i>anti</i> |
| $\phi$          | 0          | 70            | 120               | 180         | 0          | 70            | 120               | 180         | 0          | 70            | 120               | 180         |
| $r(1-2)$        | 1.205      | 1.215         | 1.204             | 1.200       | 1.195      | 1.191         | 1.188             | 1.191       | 1.193      | 1.189         | 1.186             | 1.189       |
| $r(1-3)$        | 1.205      | 1.201         | 1.198             | 1.200       | 1.195      | 1.200         | 1.194             | 1.191       | 1.193      | 1.198         | 1.191             | 1.188       |
| $r(1-4)$        | 1.741      | 1.636         | 1.685             | 1.671       | 1.702      | 1.629         | 1.665             | 1.633       | 1.679      | 1.618         | 1.650             | 1.616       |
| $r(1-8)$        | 1.370      | 1.382         | 1.392             | 1.397       | 1.827      | 1.845         | 1.860             | 1.866       | 2.001      | 2.021         | 2.037             | 2.045       |
| $r(4-5)$        | 1.019      | 1.022         | 1.022             | 1.021       | 1.017      | 1.020         | 1.021             | 1.020       | 1.017      | 1.020         | 1.021             | 1.019       |
| $r(4-6)$        | 1.019      | 1.020         | 1.019             | 1.021       | 1.017      | 1.019         | 1.018             | 1.020       | 1.017      | 1.019         | 1.018             | 1.019       |
| $r(4-7)$        | 1.371      | 1.380         | 1.375             | 1.369       | 1.725      | 1.732         | 1.727             | 1.728       | 1.888      | 1.890         | 1.887             | 1.893       |
| $\angle(2-1-3)$ | 116.0      | 115.2         | 116.8             | 116.8       | 116.2      | 116.3         | 117.1             | 117.5       | 116.8      | 117.0         | 117.7             | 118.3       |
| $\angle(2-1-4)$ | 101.6      | 98.6          | 103.2             | 104.4       | 102.3      | 106.7         | 106.9             | 106.3       | 103.2      | 107.9         | 108.3             | 107.6       |
| $\angle(2-1-8)$ | 115.5      | 114.7         | 113.6             | 115.0       | 112.7      | 113.8         | 112.7             | 112.7       | 111.1      | 112.5         | 111.1             | 111.4       |
| $\angle(3-1-4)$ | 101.6      | 105.1         | 103.7             | 104.4       | 102.3      | 101.6         | 104.5             | 106.3       | 103.2      | 102.6         | 105.5             | 107.6       |
| $\angle(3-1-8)$ | 115.5      | 116.0         | 115.8             | 115.0       | 112.8      | 112.2         | 111.8             | 112.7       | 111.2      | 110.8         | 110.8             | 111.4       |
| $\angle(4-1-8)$ | 103.5      | 104.4         | 100.8             | 97.7        | 109.1      | 104.6         | 102.3             | 99.2        | 110.7      | 104.8         | 102.2             | 98.6        |
| $\angle(1-4-5)$ | 111.7      | 110.3         | 107.3             | 110.7       | 107.7      | 108.9         | 107.3             | 109.5       | 107.7      | 109.4         | 108.1             | 110.2       |
| $\angle(1-4-6)$ | 111.7      | 111.4         | 113.6             | 110.7       | 107.7      | 109.8         | 110.4             | 109.5       | 107.7      | 109.9         | 110.7             | 110.2       |
| $\angle(1-4-7)$ | 114.1      | 115.3         | 115.9             | 114.6       | 121.3      | 116.2         | 117.2             | 114.8       | 123.4      | 116.7         | 117.2             | 114.7       |
| $\angle(5-4-6)$ | 109.1      | 109.7         | 109.6             | 108.9       | 107.8      | 108.8         | 108.4             | 107.6       | 107.4      | 108.6         | 108.2             | 107.4       |
| $\angle(5-4-7)$ | 104.9      | 104.5         | 105.6             | 105.8       | 105.9      | 106.3         | 106.8             | 107.6       | 104.9      | 105.8         | 106.1             | 107.0       |
| $\angle(6-4-7)$ | 104.9      | 105.3         | 104.6             | 105.8       | 105.9      | 106.6         | 106.5             | 107.6       | 104.9      | 106.1         | 106.1             | 107.0       |



**Table S10. Geometrical parameters of the XCH<sub>2</sub>OX systems obtained in the M06-2X/6-311++G(3df,2p) level, distances are given in Å and angles in degrees.**

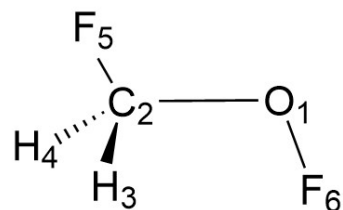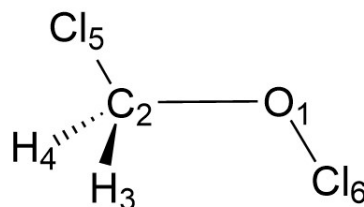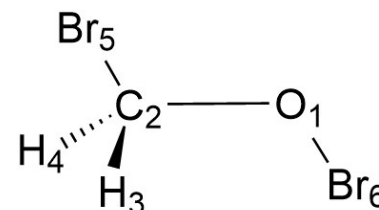

| Parameter       | <i>syn</i> | <i>gauche</i> | <i>anticlinal</i> | <i>anti</i> | <i>syn</i> | <i>gauche</i> | <i>anticlinal</i> | <i>anti</i> | <i>syn</i> | <i>gauche</i> | <i>anticlinal</i> | <i>anti</i> |
|-----------------|------------|---------------|-------------------|-------------|------------|---------------|-------------------|-------------|------------|---------------|-------------------|-------------|
| $\phi$          | 0          | 80            | 120               | 180         | 0          | 80            | 120               | 180         | 0          | 80            | 120               | 180         |
| $r(1-2)$        | 1.439      | 1.377         | 1.399             | 1.418       | 1.422      | 1.387         | 1.402             | 1.412       | 1.408      | 1.378         | 1.392             | 1.403       |
| $r(1-6)$        | 1.387      | 1.401         | 1.398             | 1.396       | 1.661      | 1.674         | 1.671             | 1.675       | 1.806      | 1.819         | 1.817             | 1.825       |
| $r(2-3)$        | 1.091      | 1.089         | 1.087             | 1.090       | 1.087      | 1.087         | 1.085             | 1.088       | 1.086      | 1.087         | 1.084             | 1.088       |
| $r(2-4)$        | 1.091      | 1.091         | 1.091             | 1.090       | 1.087      | 1.086         | 1.087             | 1.088       | 1.086      | 1.086         | 1.086             | 1.088       |
| $r(2-5)$        | 1.339      | 1.358         | 1.356             | 1.345       | 1.763      | 1.783         | 1.777             | 1.758       | 1.937      | 1.960         | 1.952             | 1.929       |
| $\angle(2-1-6)$ | 108.5      | 106.1         | 106.9             | 102.7       | 119.4      | 112.5         | 113.5             | 109.2       | 122.4      | 114.0         | 114.6             | 110.1       |
| $\angle(1-2-3)$ | 106.9      | 110.8         | 109.4             | 109.7       | 107.0      | 111.9         | 112.1             | 110.8       | 107.8      | 113.1         | 113.6             | 111.9       |
| $\angle(1-2-4)$ | 106.9      | 103.7         | 107.9             | 109.7       | 107.0      | 105.1         | 108.3             | 110.8       | 107.8      | 105.9         | 109.0             | 111.9       |
| $\angle(1-2-5)$ | 111.6      | 111.2         | 108.7             | 103.7       | 117.0      | 113.0         | 109.7             | 105.8       | 118.5      | 113.6         | 109.8             | 105.8       |
| $\angle(3-2-4)$ | 112.6      | 113.0         | 112.9             | 112.8       | 111.8      | 112.3         | 111.8             | 111.7       | 112.0      | 112.4         | 111.9             | 111.9       |
| $\angle(3-2-5)$ | 109.4      | 109.0         | 110.6             | 110.2       | 107.1      | 106.9         | 108.1             | 108.7       | 105.4      | 105.5         | 106.7             | 107.5       |
| $\angle(4-2-5)$ | 109.4      | 109.1         | 107.3             | 110.2       | 107.1      | 107.7         | 106.7             | 108.7       | 105.4      | 106.2         | 105.4             | 107.5       |

**Table S11. Geometrical parameters of the XCH<sub>2</sub>SX systems obtained in the M06-2X/6-311++G(3df,2p) level, distances are given in Å and angles in degrees.**

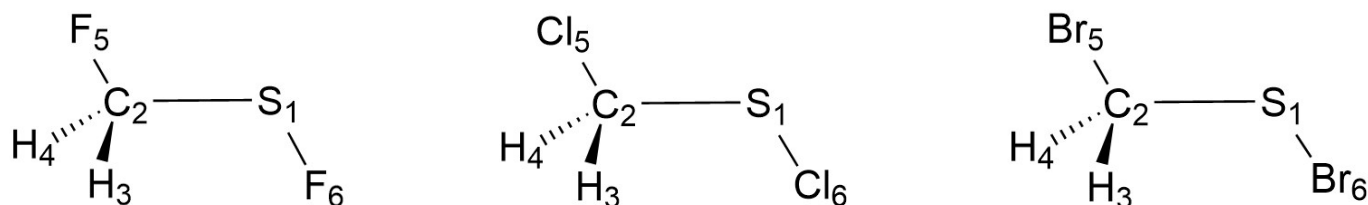

| Parameter       | <i>syn</i> | <i>gauche</i> | <i>anticlinal</i> | <i>anti</i> | <i>syn</i> | <i>gauche</i> | <i>anticlinal</i> | <i>anti</i> | <i>syn</i> | <i>gauche</i> | <i>anticlinal</i> | <i>anti</i> |
|-----------------|------------|---------------|-------------------|-------------|------------|---------------|-------------------|-------------|------------|---------------|-------------------|-------------|
| $\phi$          | 0          | 80            | 120               | 180         | 0          | 80            | 120               | 180         | 0          | 80            | 120               | 180         |
| $r(1-2)$        | 1.850      | 1.765         | 1.792             | 1.815       | 1.846      | 1.782         | 1.805             | 1.806       | 1.837      | 1.779         | 1.802             | 1.799       |
| $r(1-6)$        | 1.610      | 1.618         | 1.622             | 1.623       | 2.011      | 2.022         | 2.027             | 2.029       | 2.172      | 2.179         | 2.185             | 2.191       |
| $r(2-3)$        | 1.088      | 1.090         | 1.090             | 1.088       | 1.085      | 1.085         | 1.084             | 1.085       | 1.084      | 1.084         | 1.083             | 1.084       |
| $r(2-4)$        | 1.088      | 1.093         | 1.089             | 1.088       | 1.085      | 1.089         | 1.085             | 1.085       | 1.084      | 1.088         | 1.084             | 1.084       |
| $r(2-5)$        | 1.354      | 1.369         | 1.369             | 1.364       | 1.755      | 1.778         | 1.778             | 1.769       | 1.919      | 1.945         | 1.945             | 1.934       |
| $\angle(2-1-6)$ | 97.9       | 98.5          | 98.2              | 95.0        | 105.1      | 99.7          | 100.6             | 97.7        | 107.3      | 100.7         | 101.2             | 98.1        |
| $\angle(1-2-3)$ | 108.8      | 109.1         | 106.0             | 110.1       | 106.8      | 110.3         | 108.6             | 110.7       | 106.9      | 111.4         | 109.8             | 111.6       |
| $\angle(1-2-4)$ | 108.8      | 105.5         | 110.2             | 110.1       | 106.7      | 105.0         | 109.0             | 110.7       | 106.9      | 105.2         | 109.5             | 111.6       |
| $\angle(1-2-5)$ | 109.4      | 113.9         | 111.8             | 105.6       | 116.7      | 115.0         | 112.8             | 105.8       | 118.7      | 115.9         | 112.9             | 105.4       |
| $\angle(3-2-4)$ | 111.3      | 110.7         | 111.0             | 111.5       | 110.8      | 110.3         | 110.5             | 111.7       | 111.0      | 110.6         | 110.9             | 112.1       |
| $\angle(3-2-5)$ | 109.2      | 108.8         | 110.7             | 109.7       | 107.9      | 107.7         | 109.0             | 108.9       | 106.7      | 106.8         | 107.7             | 107.9       |
| $\angle(4-2-5)$ | 109.3      | 108.9         | 107.2             | 109.8       | 107.9      | 108.3         | 107.0             | 108.9       | 106.7      | 107.0         | 106.1             | 107.9       |

**Table S12. Geometrical parameters of the XOOX systems obtained in the M06-2X/6-311++G(3df,2p) level, distances are given in Å and angles in degrees.**

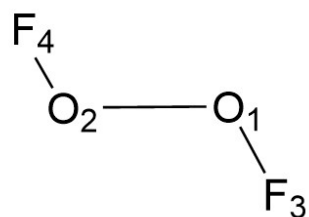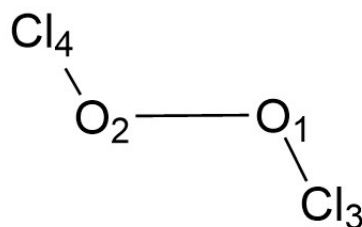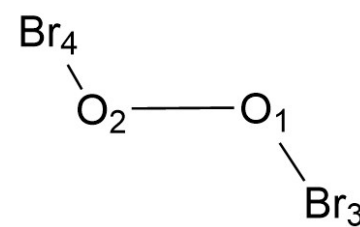

| Parameter       | <i>syn</i> | <i>gauche</i> | <i>anticlinal</i> | <i>anti</i> | <i>syn</i> | <i>gauche</i> | <i>anticlinal</i> | <i>anti</i> | <i>syn</i> | <i>gauche</i> | <i>anticlinal</i> | <i>anti</i> |
|-----------------|------------|---------------|-------------------|-------------|------------|---------------|-------------------|-------------|------------|---------------|-------------------|-------------|
| $\phi$          | 0          | 90            | 120               | 180         | 0          | 90            | 120               | 180         | 0          | 90            | 120               | 180         |
| $r(1-2)$        | 1.455      | 1.287         | 1.329             | 1.433       | 1.473      | 1.378         | 1.406             | 1.452       | 1.448      | 1.369         | 1.396             | 1.443       |
| $r(1-3)$        | 1.362      | 1.415         | 1.400             | 1.368       | 1.646      | 1.688         | 1.674             | 1.656       | 1.802      | 1.844         | 1.829             | 1.809       |
| $r(2-4)$        | 1.362      | 1.415         | 1.400             | 1.368       | 1.646      | 1.688         | 1.674             | 1.656       | 1.802      | 1.844         | 1.829             | 1.809       |
| $\angle(2-1-3)$ | 108.2      | 106.6         | 104.9             | 99.5        | 116.3      | 109.5         | 107.8             | 104.5       | 118.9      | 110.3         | 108.6             | 104.8       |
| $\angle(1-2-4)$ | 108.2      | 106.6         | 104.9             | 99.5        | 116.3      | 109.5         | 107.8             | 104.5       | 118.9      | 110.3         | 108.6             | 104.8       |

**Table S13. Geometrical parameters of the XSSX systems obtained in the M06-2X/6-311++G(3df,2p) level, distances are given in Å and angles in degrees.**

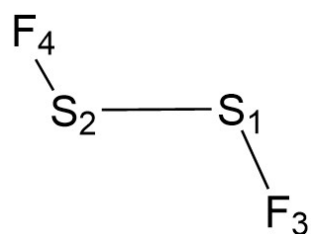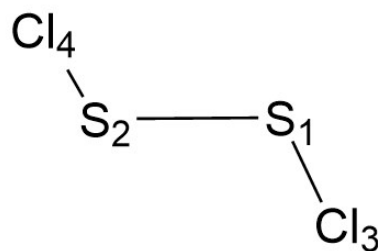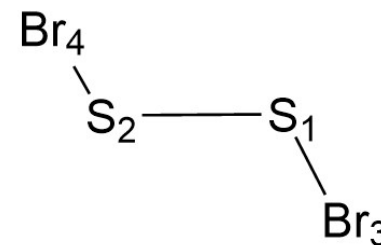

| Parameter       | <i>syn</i> | <i>gauche</i> | <i>anticlinal</i> | <i>anti</i> | <i>syn</i> | <i>gauche</i> | <i>anticlinal</i> | <i>anti</i> | <i>syn</i> | <i>gauche</i> | <i>anticlinal</i> | <i>anti</i> |
|-----------------|------------|---------------|-------------------|-------------|------------|---------------|-------------------|-------------|------------|---------------|-------------------|-------------|
| $\phi$          | 0          | 90            | 120               | 180         | 0          | 90            | 120               | 180         | 0          | 90            | 120               | 180         |
| $r(1-2)$        | 1.759      | 1.899         | 1.924             | 2.114       | 2.156      | 1.955         | 1.986             | 2.104       | 2.150      | 1.955         | 1.987             | 2.100       |
| $r(1-3)$        | 1.767      | 1.626         | 1.629             | 1.613       | 1.999      | 2.053         | 2.047             | 2.017       | 2.157      | 2.218         | 2.211             | 2.176       |
| $r(2-4)$        | 1.759      | 1.899         | 1.924             | 2.114       | 2.156      | 1.955         | 1.986             | 2.104       | 2.150      | 1.955         | 1.987             | 2.100       |
| $\angle(2-1-3)$ | 115.1      | 107.2         | 105.7             | 93.1        | 105.4      | 106.9         | 105.3             | 95.4        | 107.7      | 107.6         | 105.9             | 95.5        |
| $\angle(1-2-4)$ | 115.1      | 107.2         | 105.7             | 93.1        | 105.4      | 107.0         | 105.4             | 95.4        | 107.7      | 107.6         | 105.9             | 95.5        |

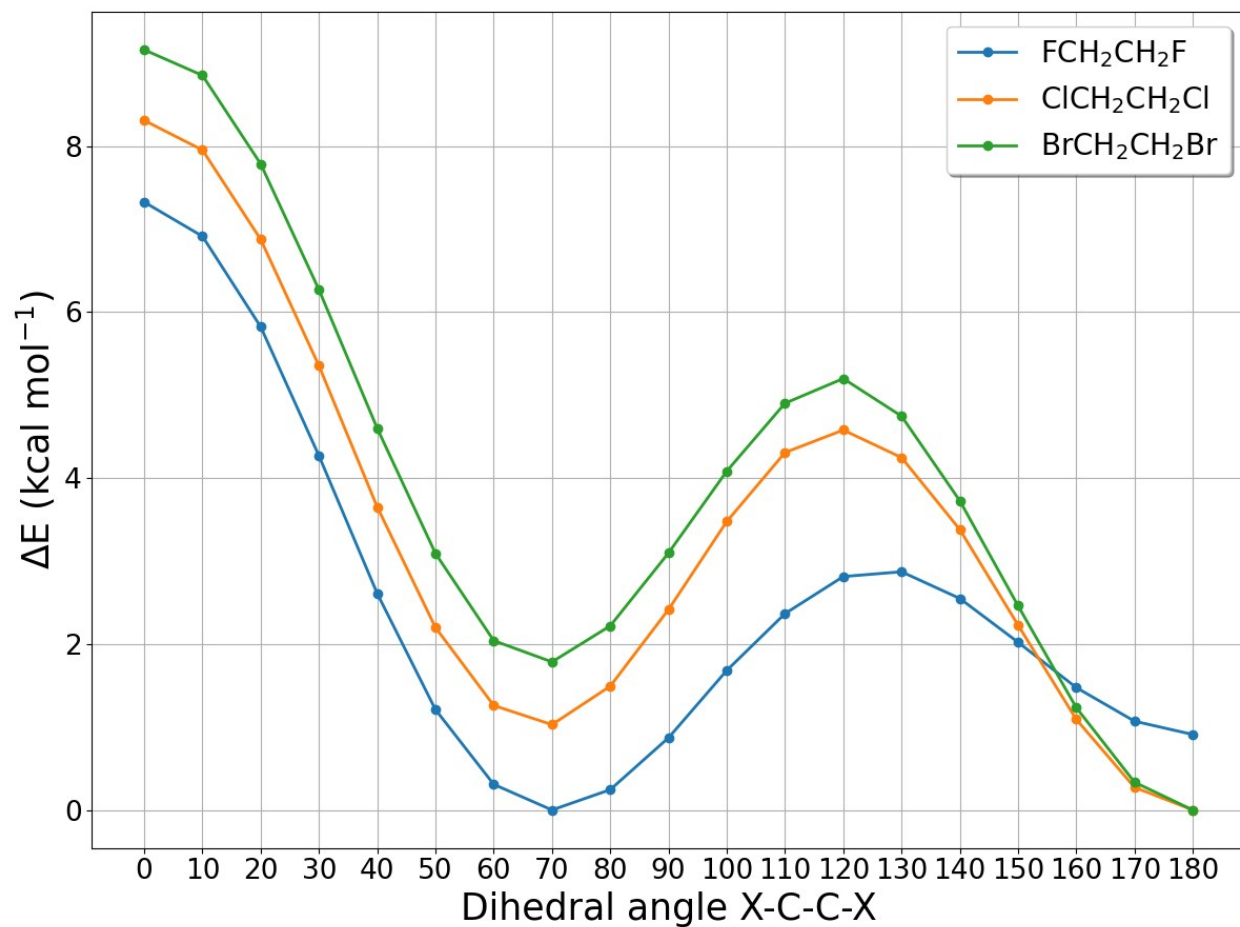

**Figure S1.** Potential energy curves for XCH<sub>2</sub>CH<sub>2</sub>X molecules calculated at the M06-2X/6-311++G(3df,2p) level.

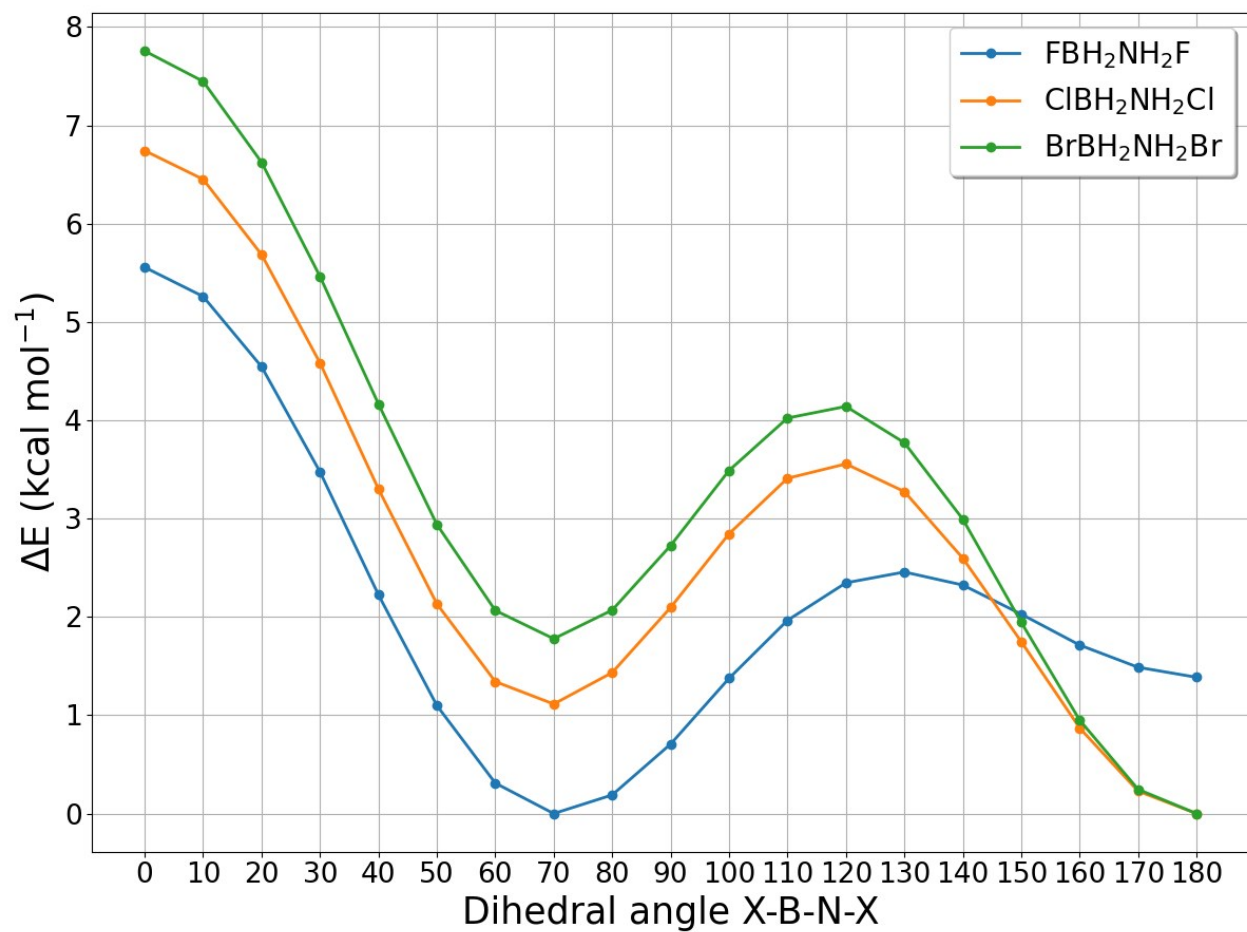

**Figure S2.** Potential energy curves for XBH<sub>2</sub>NH<sub>2</sub>X molecules calculated at the M06-2X/6-311++G(3df,2p) level.

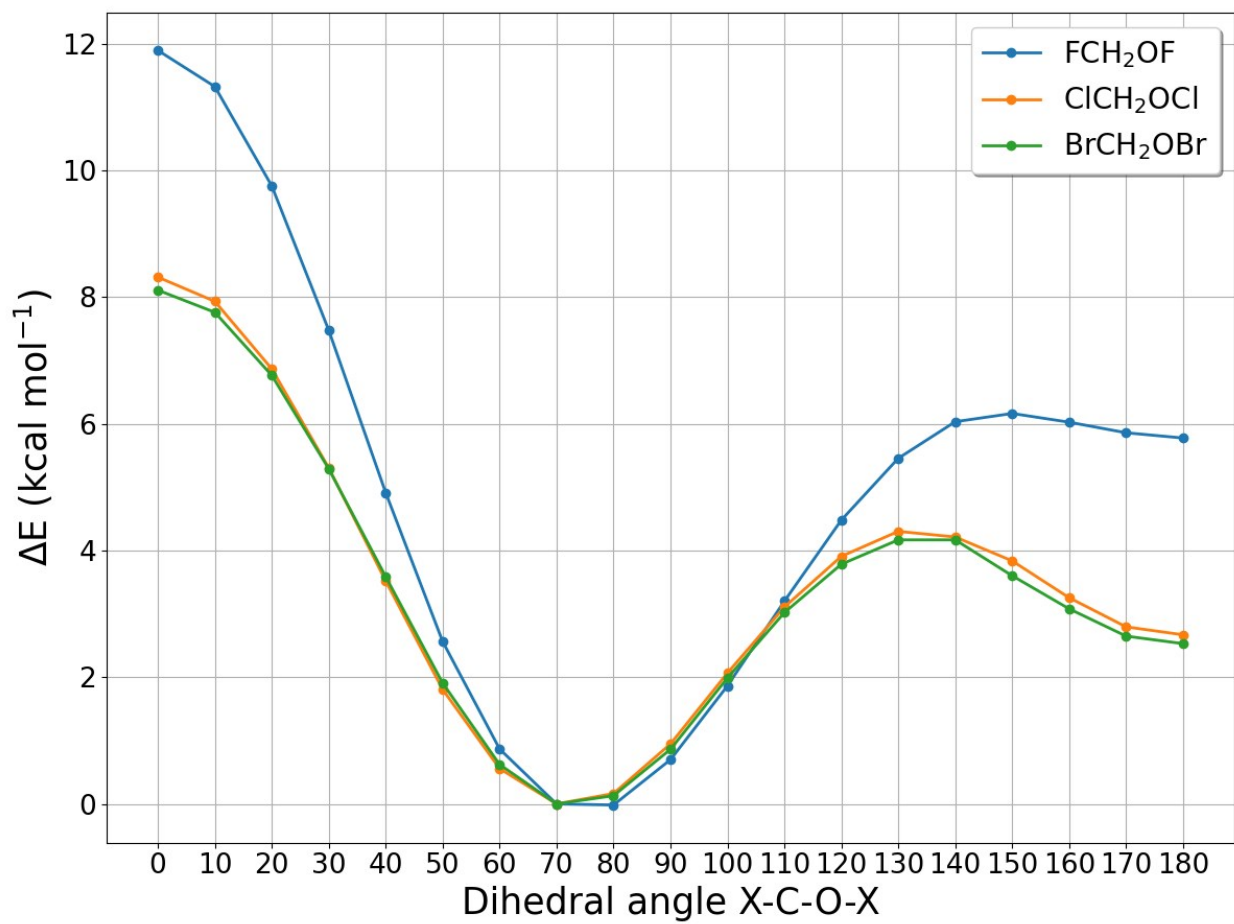

**Figure S3.** Potential energy curves for XCH<sub>2</sub>OX molecules calculated at the M06-2X/6-311++G(3df,2p) level.

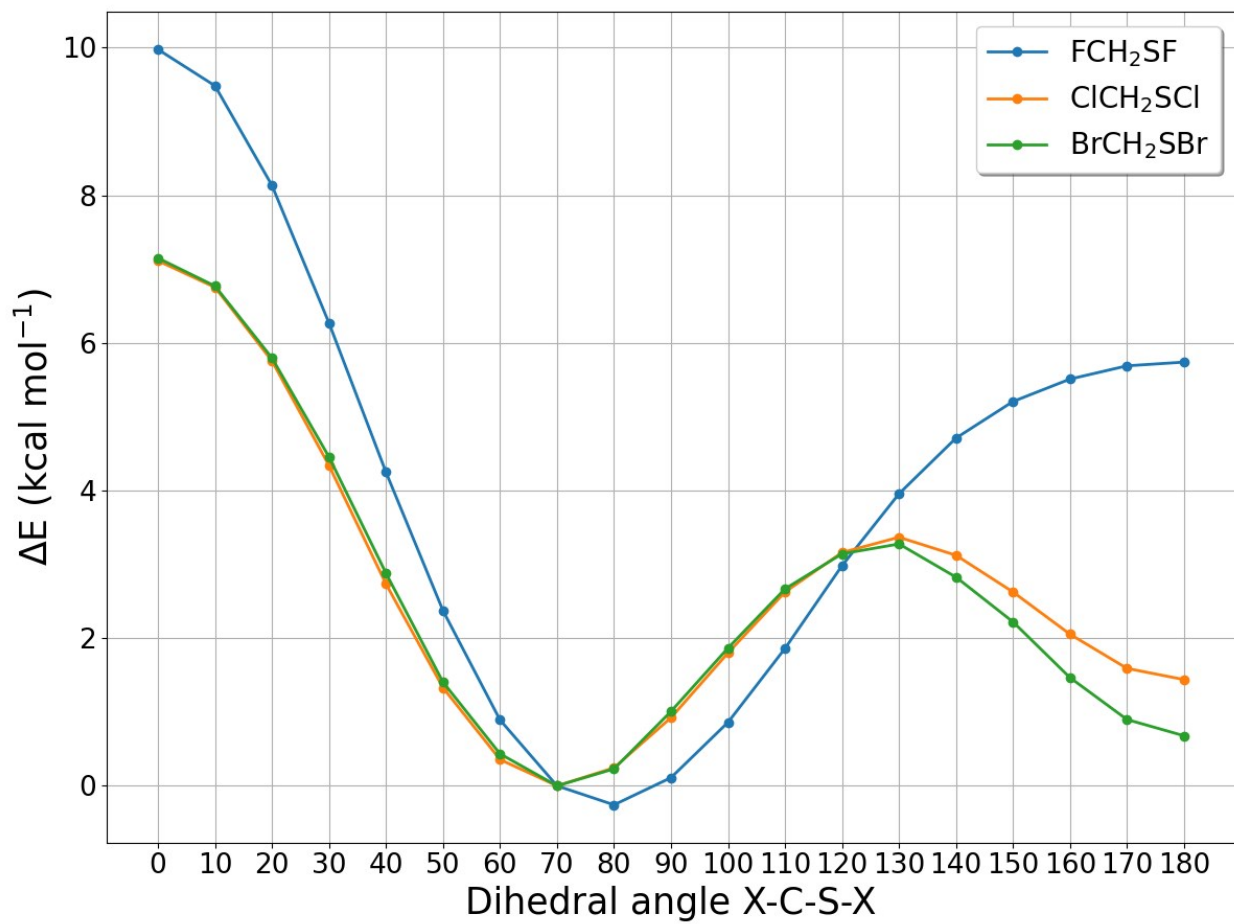

**Figure S4.** Potential energy curves for XCH<sub>2</sub>SX molecules calculated at the M06-2X/6-311++G(3df,2p) level.



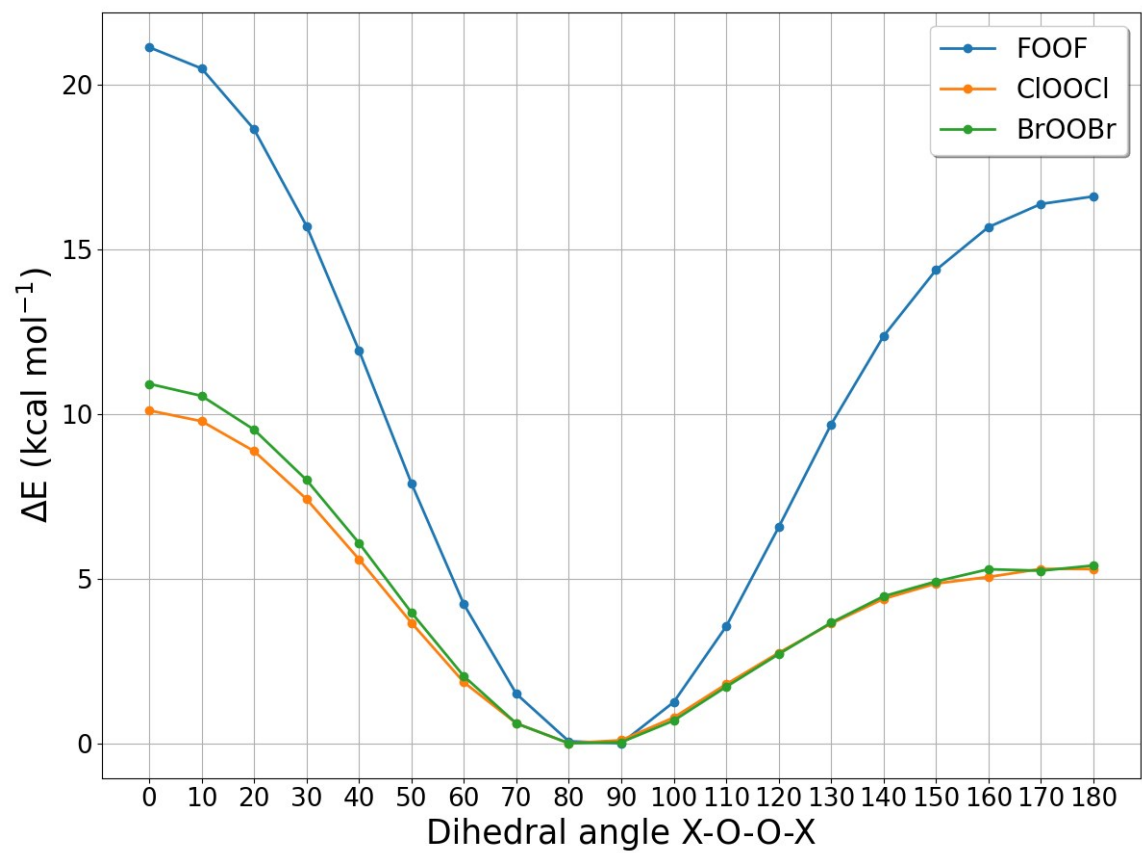

**Figure S5.** Potential energy curves for XOOX molecules calculated at the M06-2X/6-311++G(3df,2p) level.

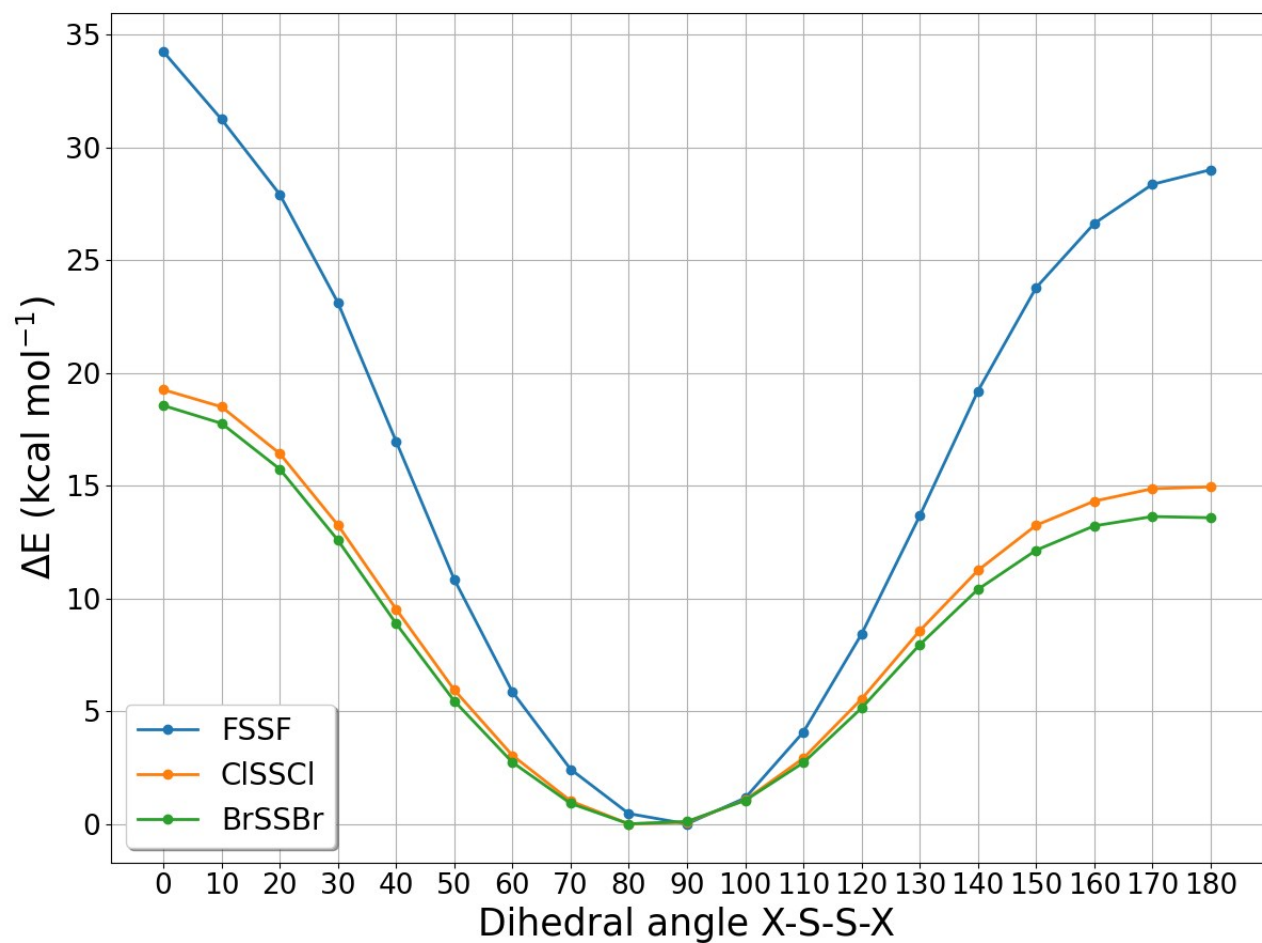

**Figure S6.** Potential energy curves for XSSX molecules calculated at the M06-2X/6-311++G(3df,2p) level.

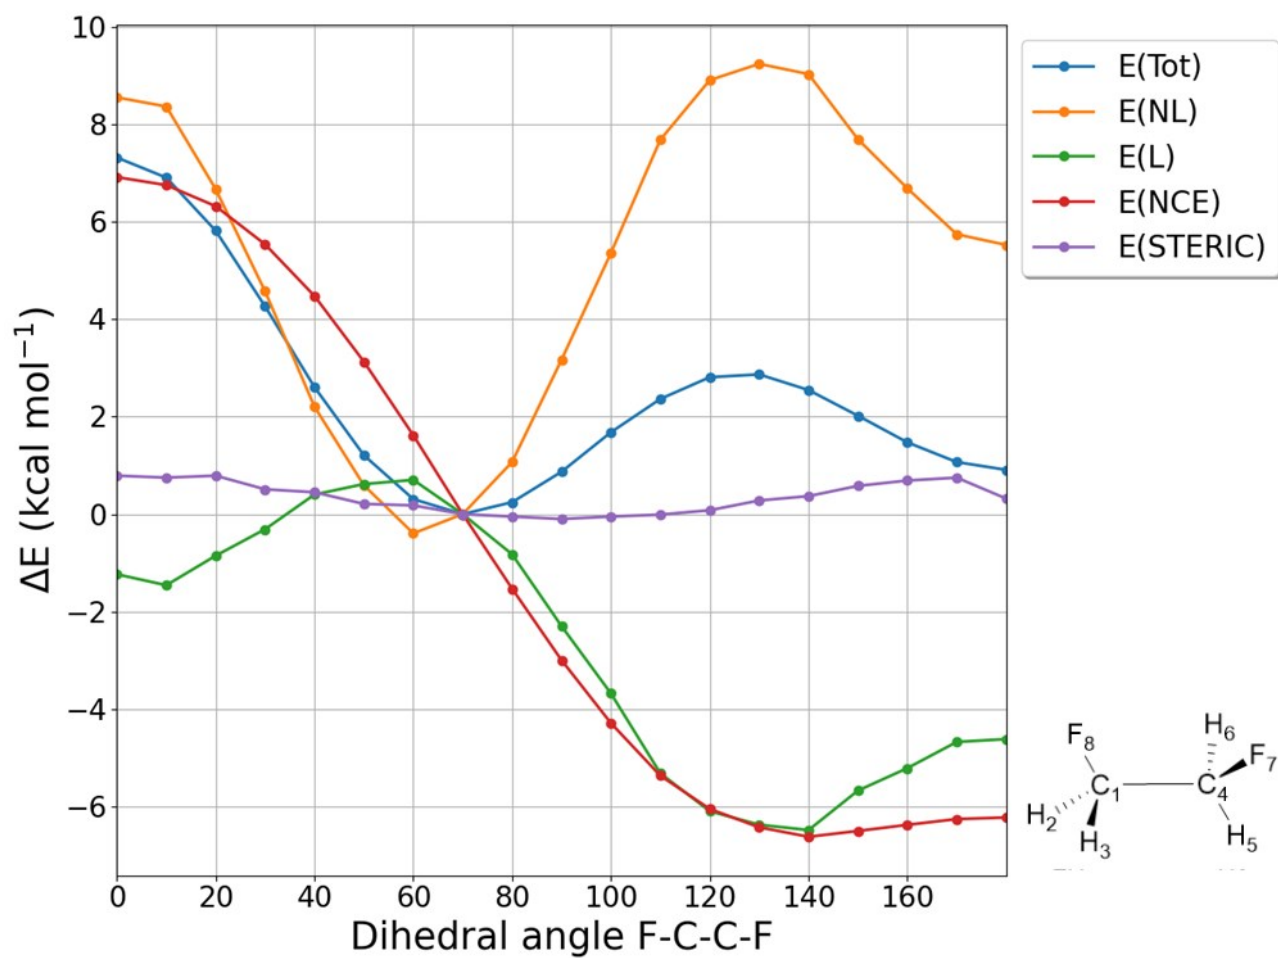

**Figure S7.** NBO deletion analysis calculated for FCH<sub>2</sub>CH<sub>2</sub>F at the M06-2X/6-311++G(3df,2p) level.

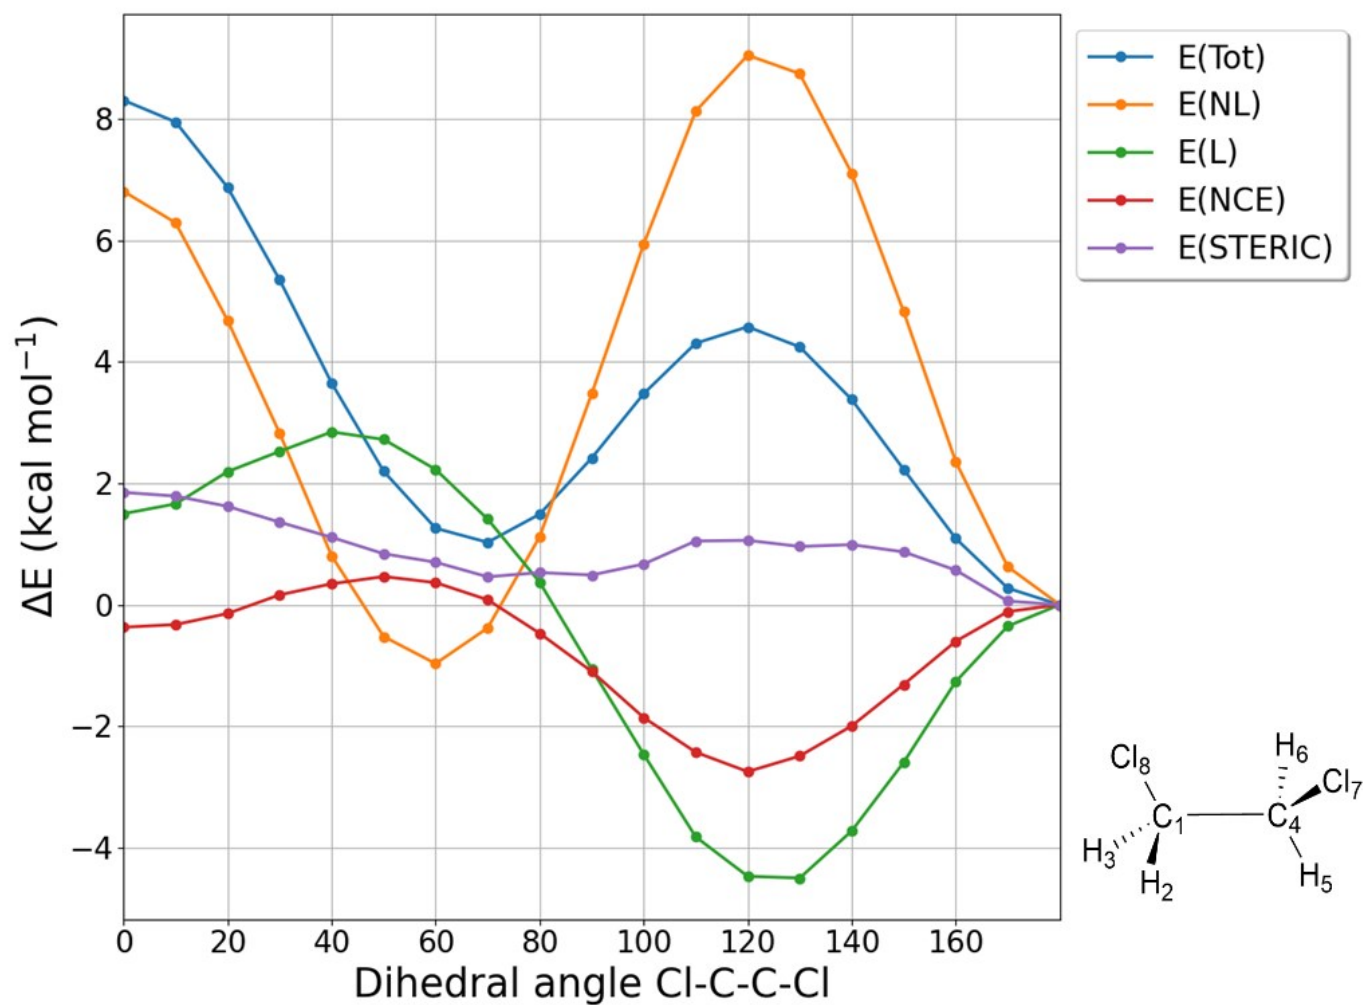

**Figure S8.** NBO deletion analysis calculated for ClCH<sub>2</sub>CH<sub>2</sub>Cl at the M06-2X/6-311++G(3df,2p) level.

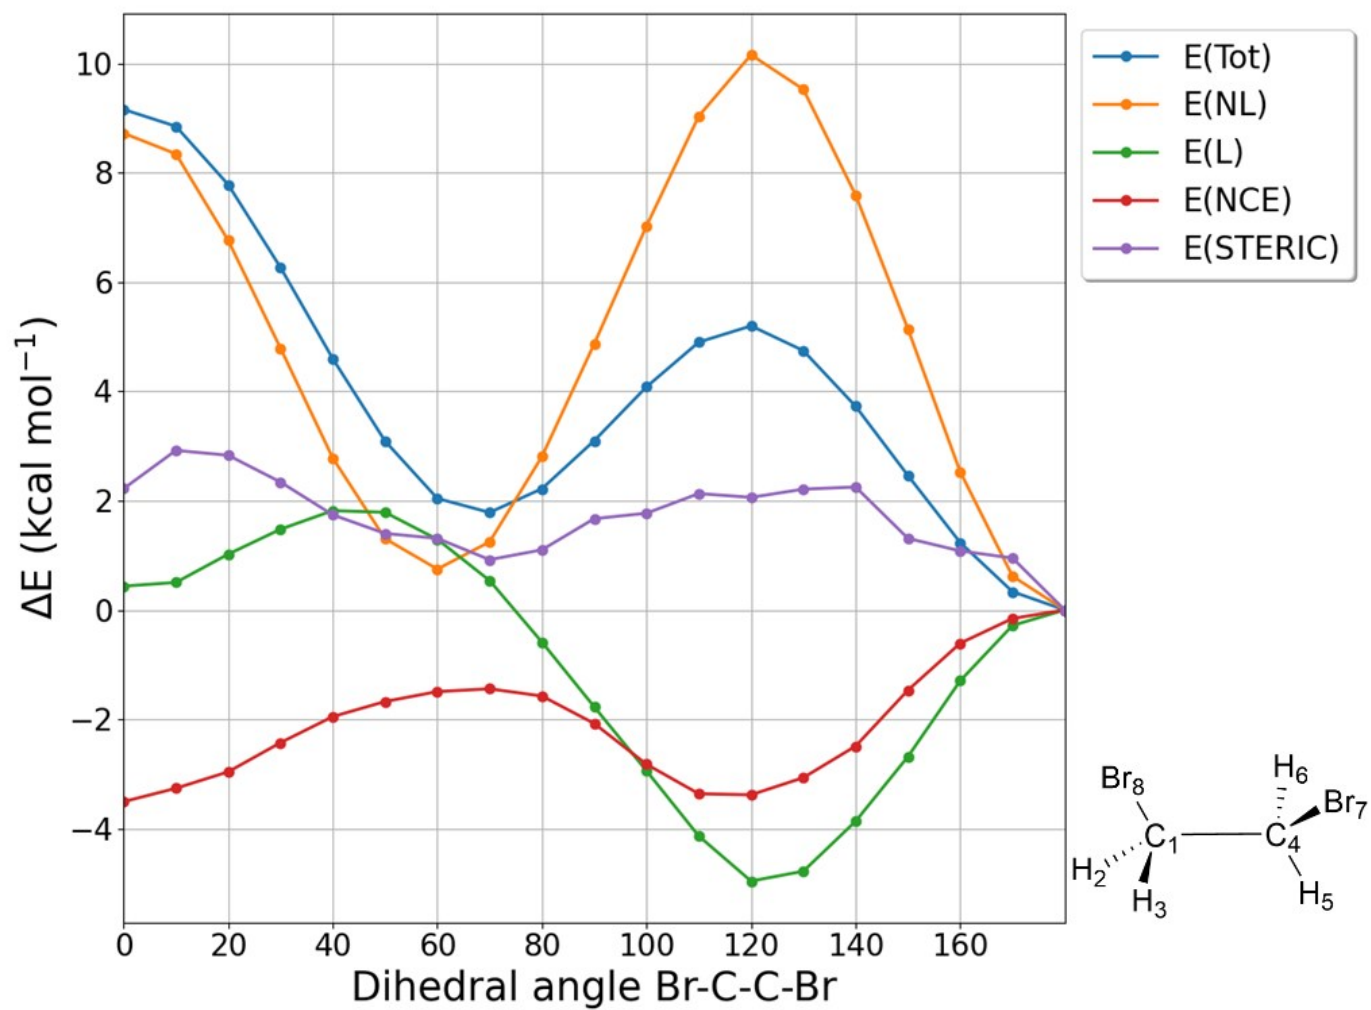

**Figure S9.** NBO deletion analysis calculated for BrCH<sub>2</sub>CH<sub>2</sub>Br at the M06-2X/6-311++G(3df,2p) level.

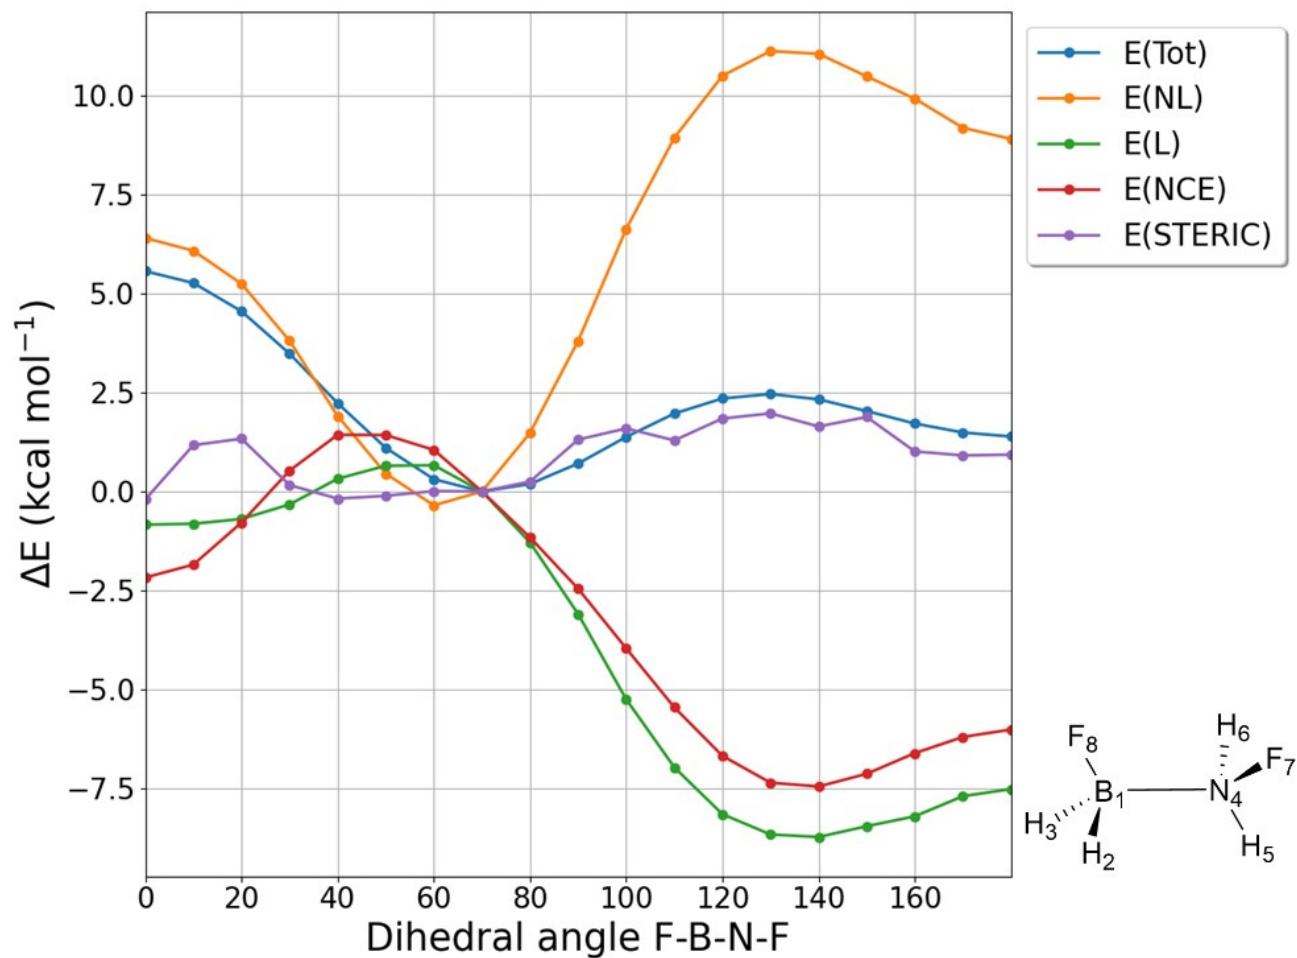

**Figure S10.** NBO deletion analysis calculated for FBH<sub>2</sub>NH<sub>2</sub>F at the M06-2X/6-311++G(3df,2p) level.

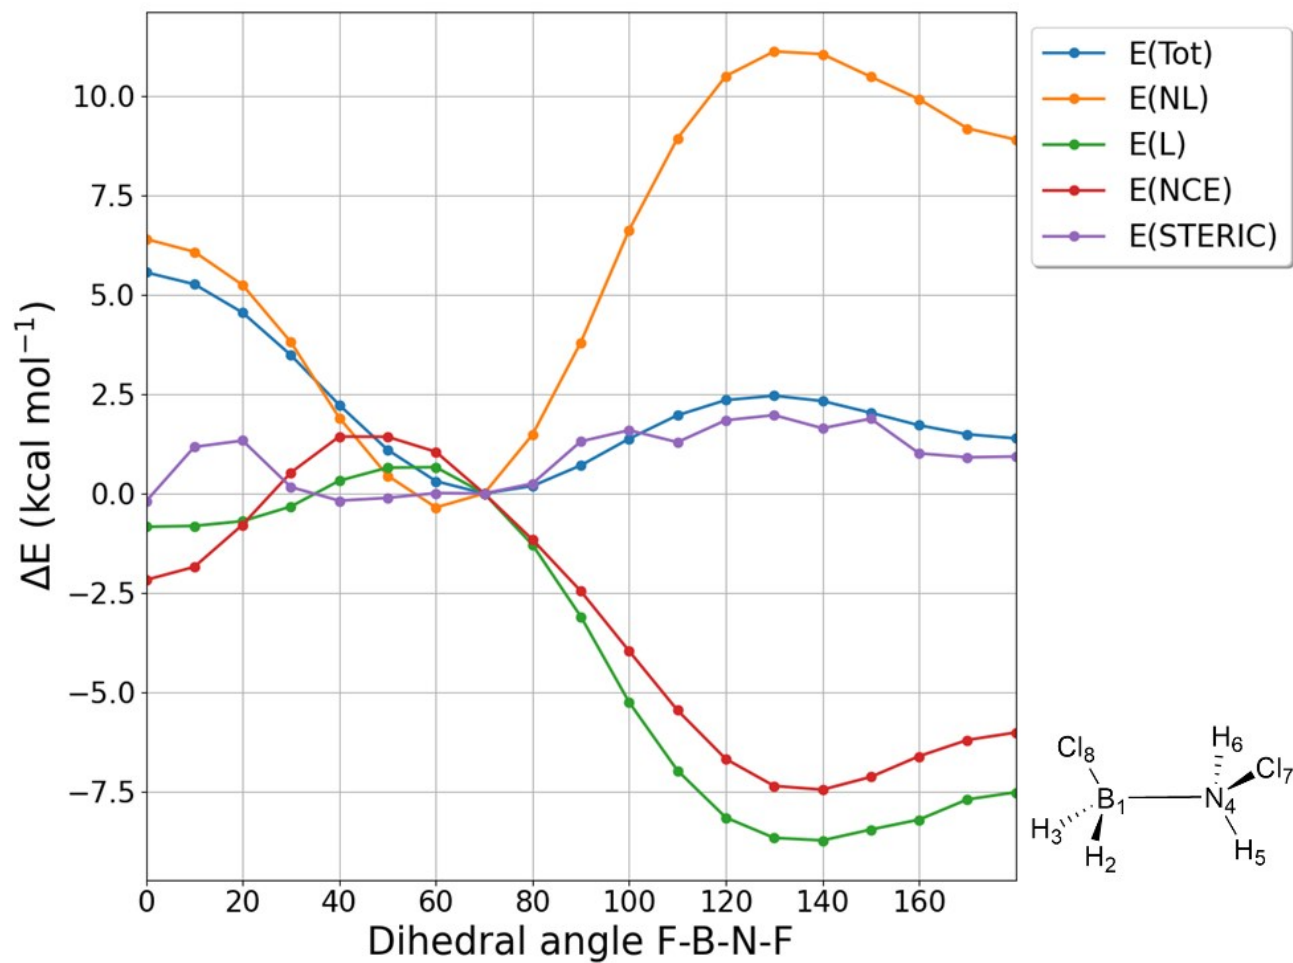

**Figure S11.** NBO deletion analysis calculated for ClBH<sub>2</sub>NH<sub>2</sub>Cl at the M06-2X/6-311++G(3df,2p) level.

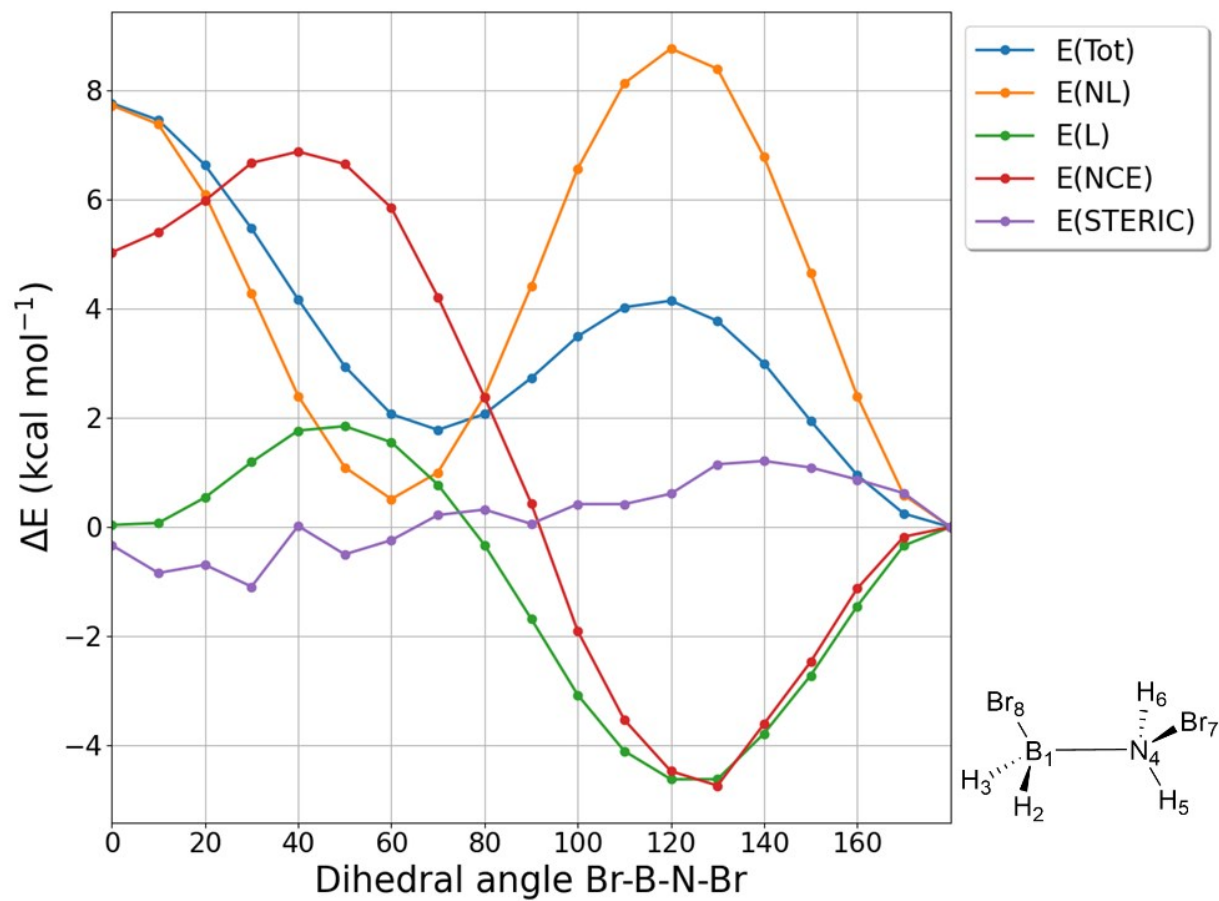

**Figure S12.** NBO deletion analysis calculated for  $\text{BrBH}_2\text{NH}_2\text{Br}$  at the M06-2X/6-311++G(3df,2p) level.



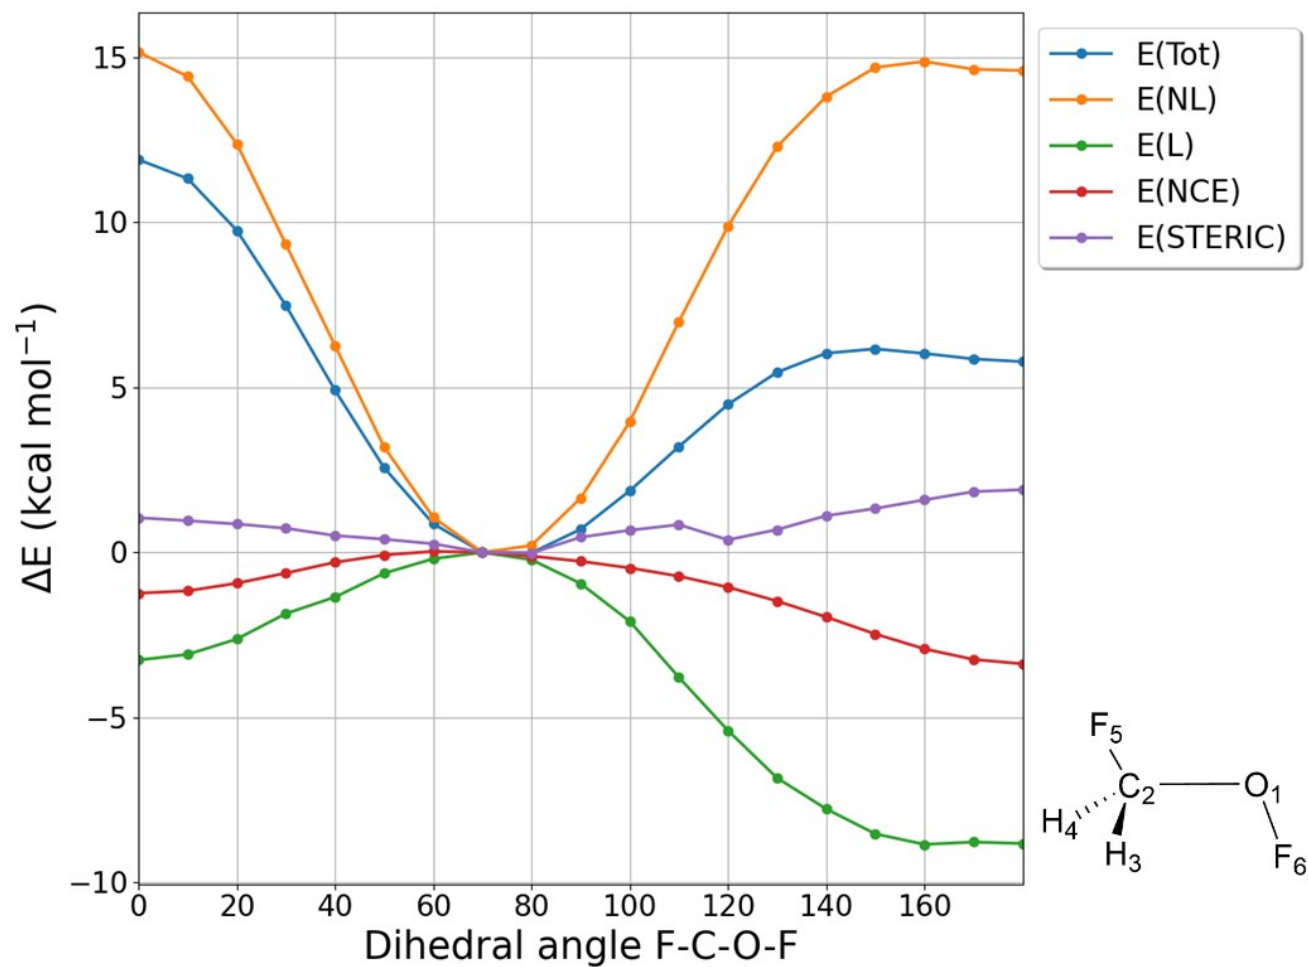

**Figure S13.** NBO deletion analysis calculated for FCH<sub>2</sub>OF at the M06-2X/6-311++G(3df,2p) level.

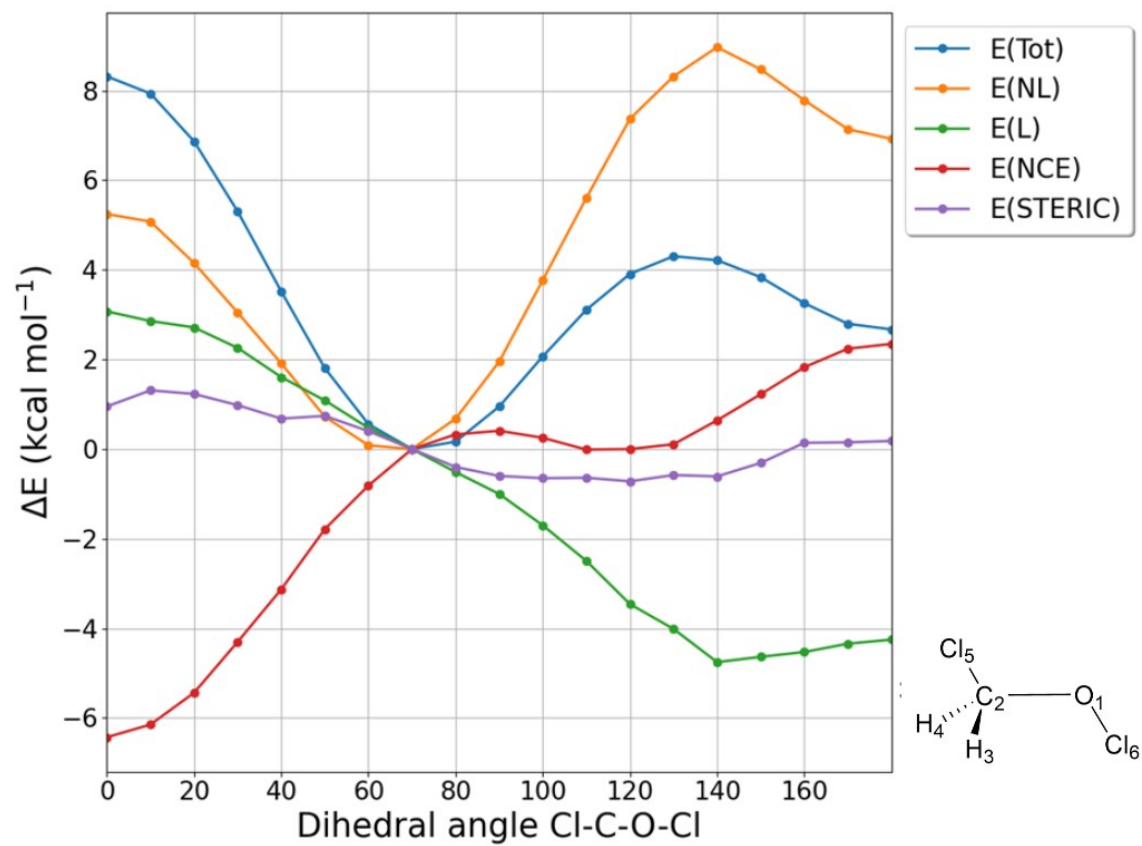

**Figure S14.** NBO deletion analysis calculated for ClCH<sub>2</sub>OCl at the M06-2X/6-311++G(3df,2p) level.

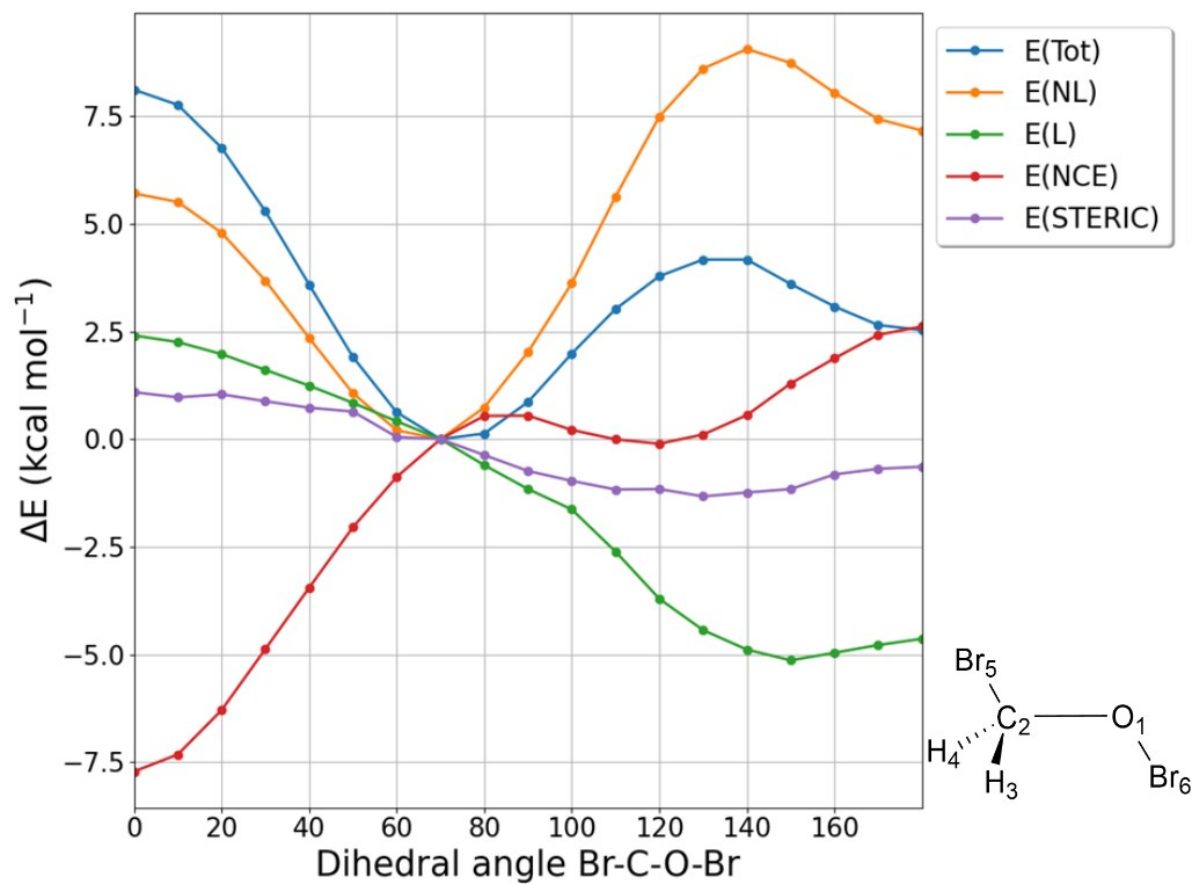

**Figure S15.** NBO deletion analysis calculated for  $\text{BrCH}_2\text{OBr}$  at the M06-2X/6-311++G(3df,2p) level.

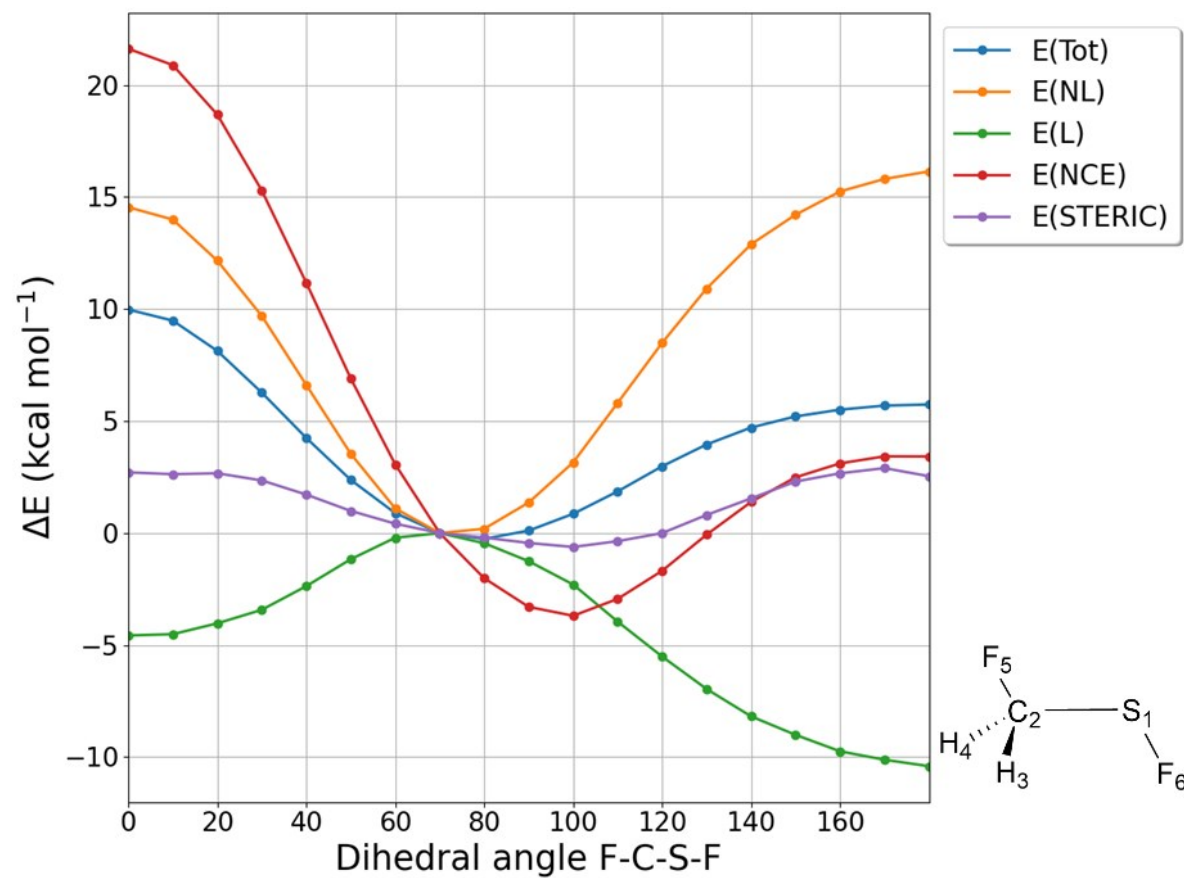

**Figure S16.** NBO deletion analysis calculated for FCH<sub>2</sub>SF at the M06-2X/6-311++G(3df,2p) level.

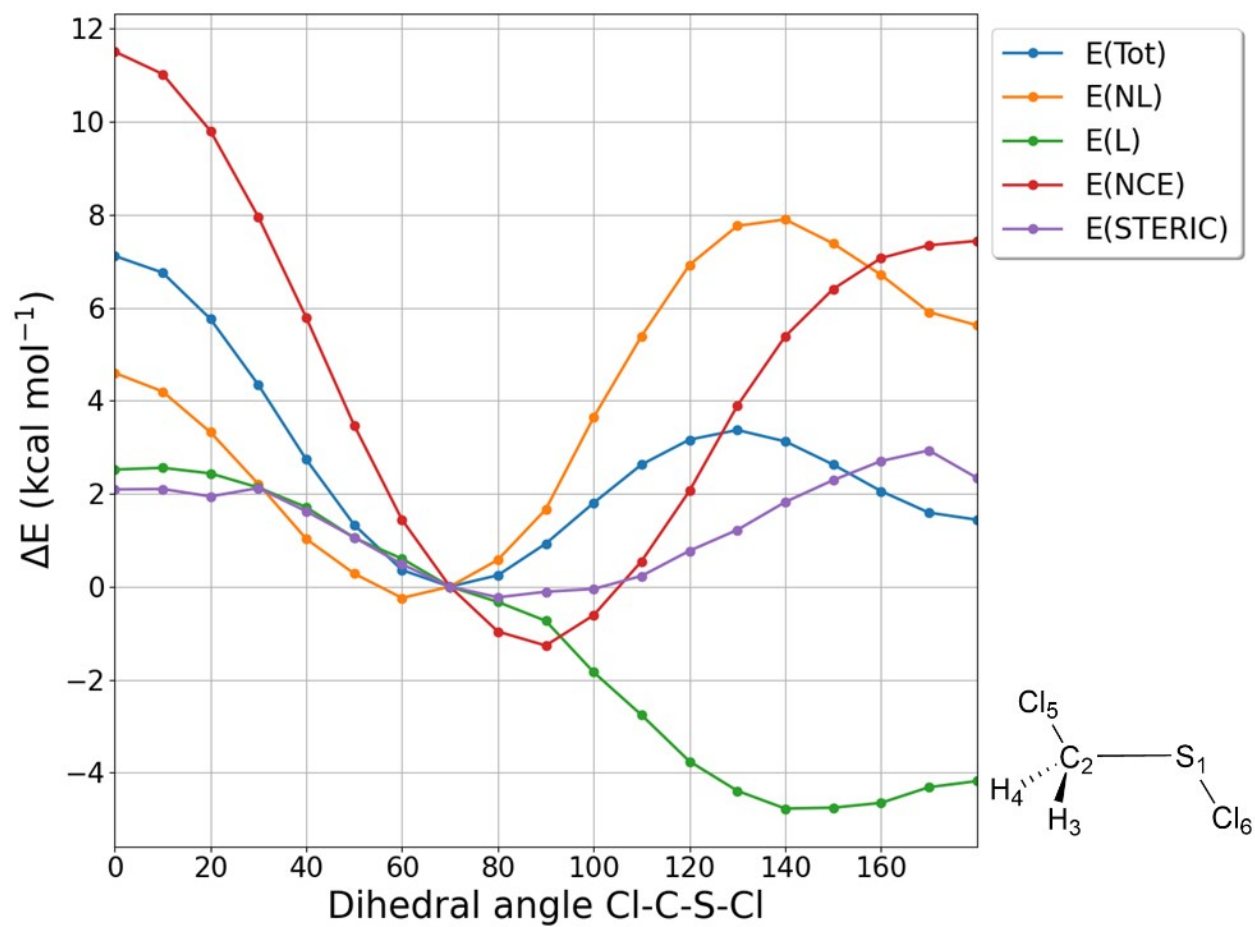

**Figure S17.** NBO deletion analysis calculated for  $\text{ClCH}_2\text{SCl}$  at the M06-2X/6-311++G(3df,2p) level.

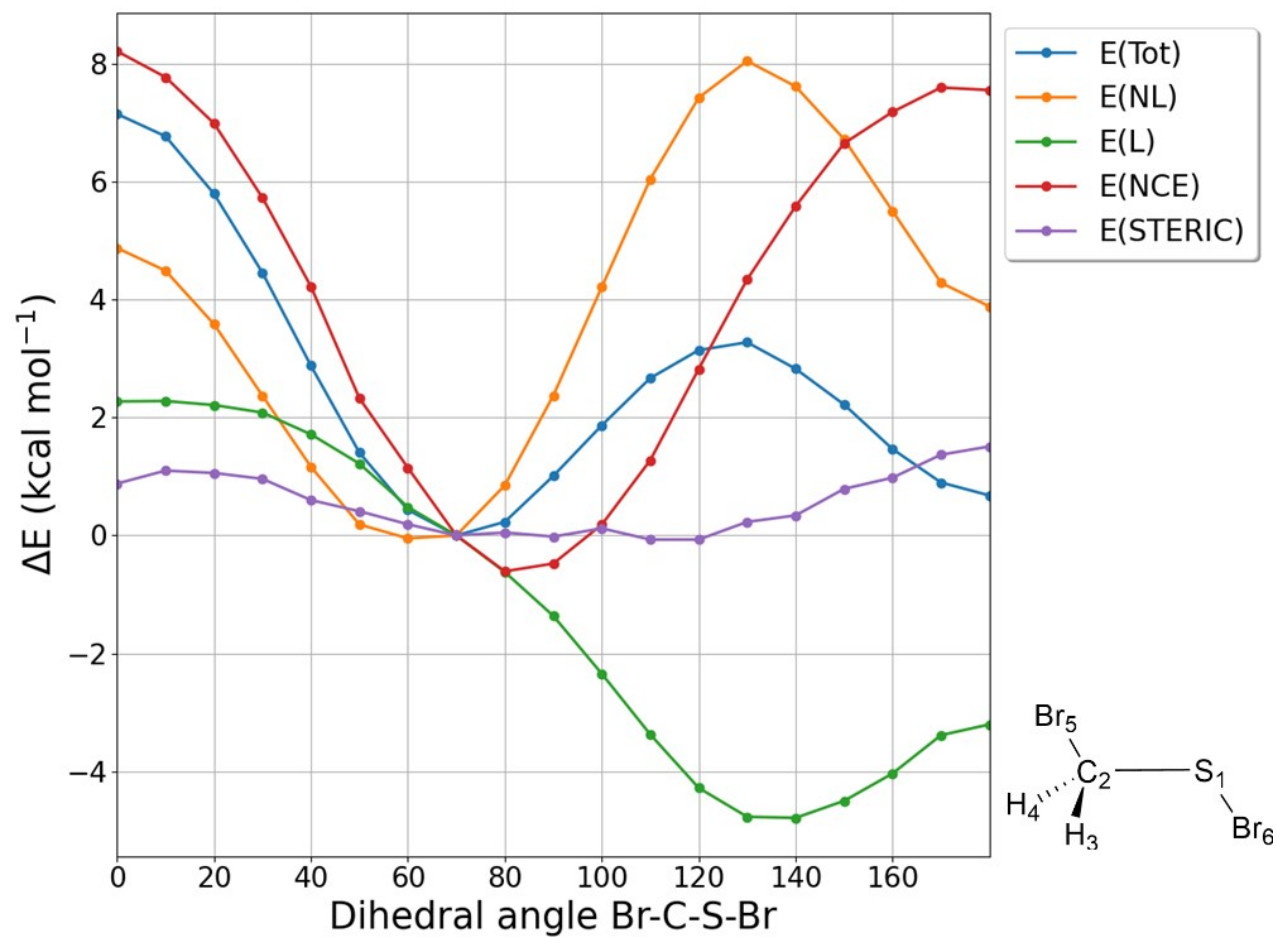

**Figure S18.** NBO deletion analysis calculated for BrCH<sub>2</sub>SBr at the M06-2X/6-311++G(3df,2p) level.

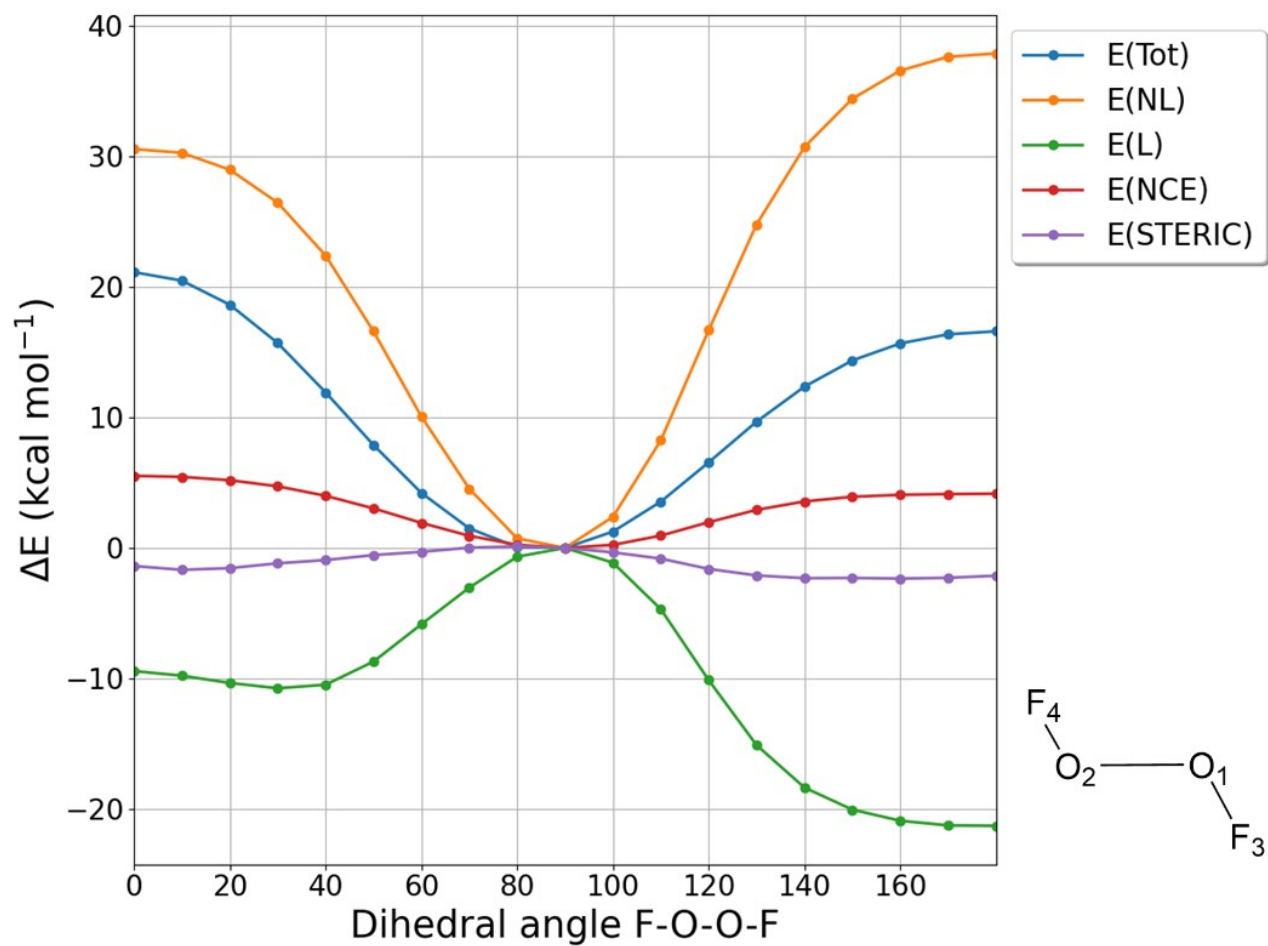

**Figure S19.** NBO deletion analysis calculated for FOOF at the M06-2X/6-311++G(3df,2p) level.

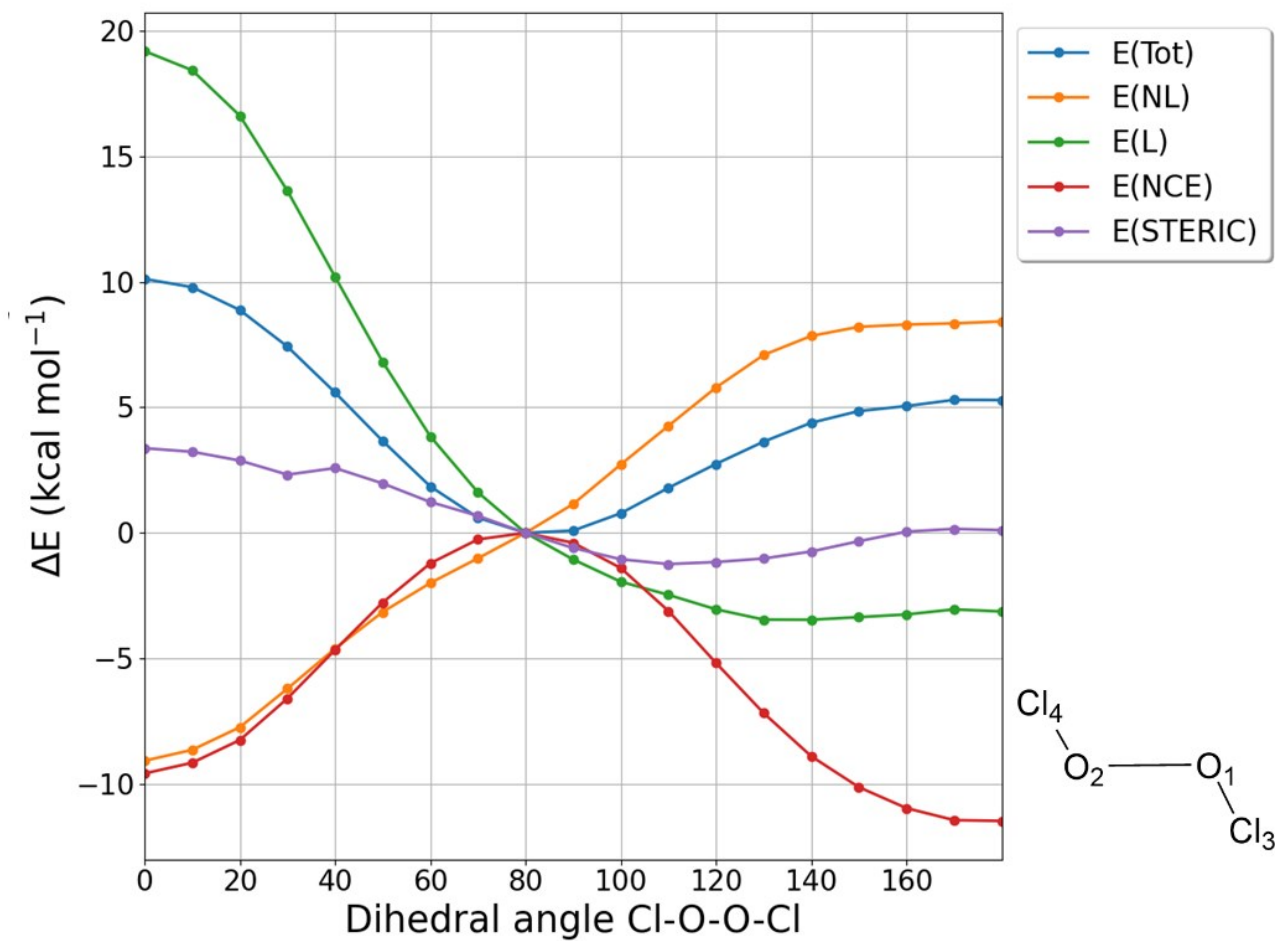

**Figure S20.** NBO deletion analysis calculated for ClOOCl at the M06-2X/6-311++G(3df,2p) level.



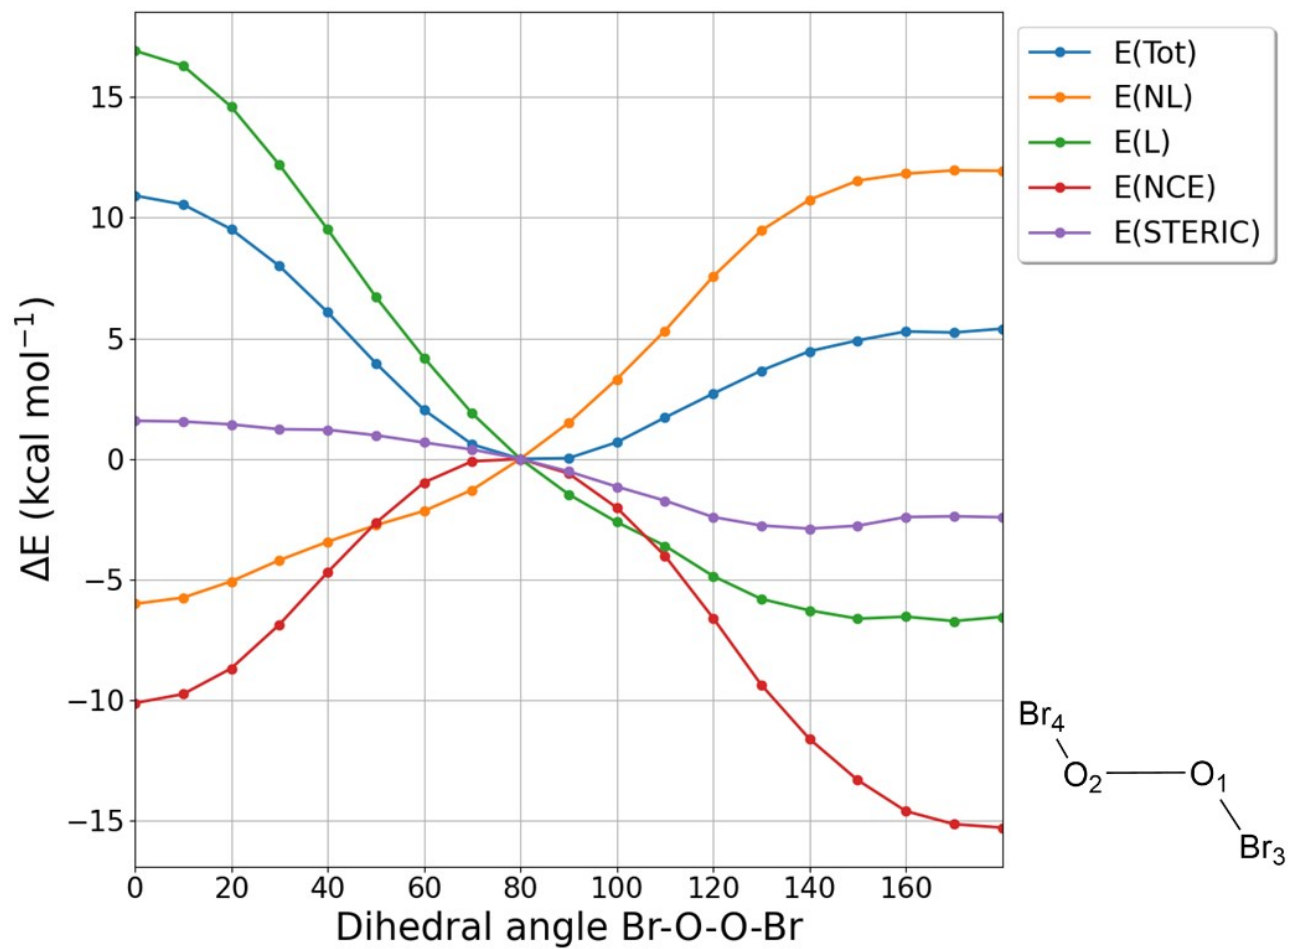

**Figure S21.** NBO deletion analysis calculated for BrOOBr at the M06-2X/6-311++G(3df,2p) level.

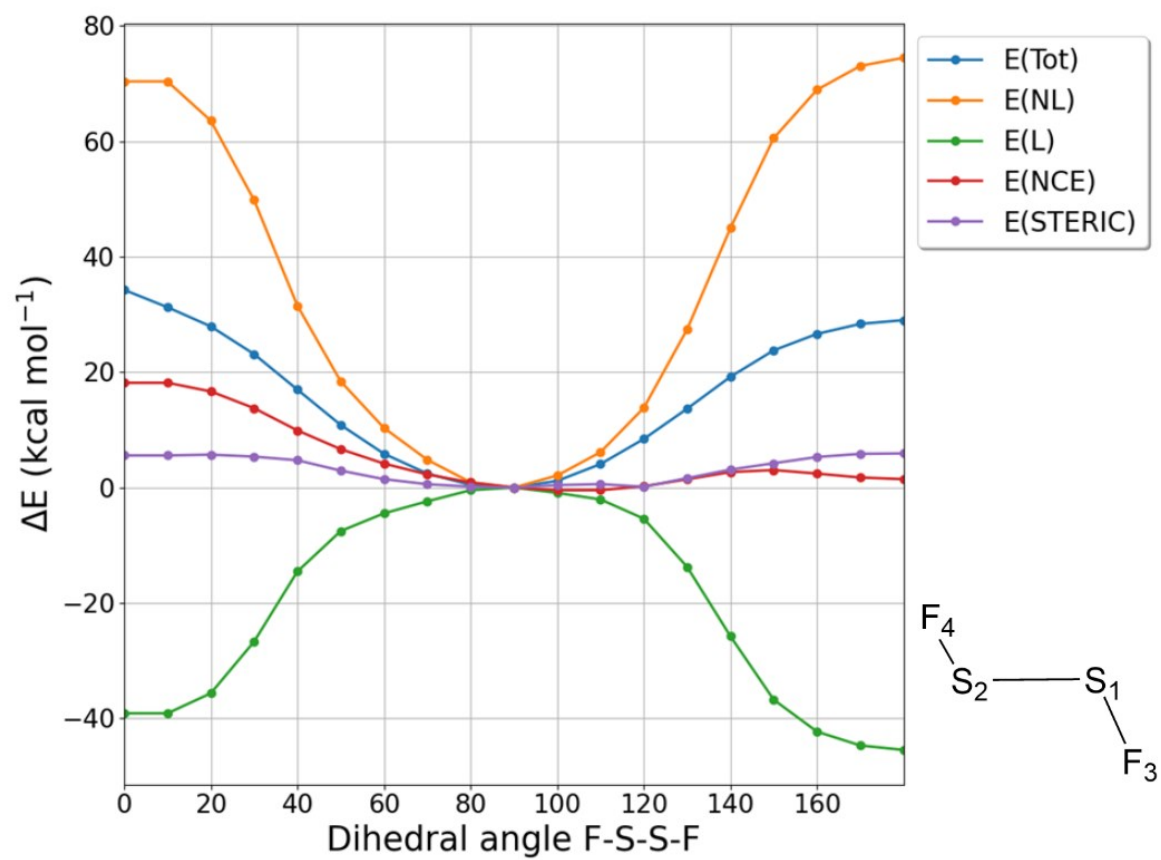

**Figure S22.** NBO deletion analysis calculated for FSSF at the M06-2X/6-311++G(3df,2p) level.

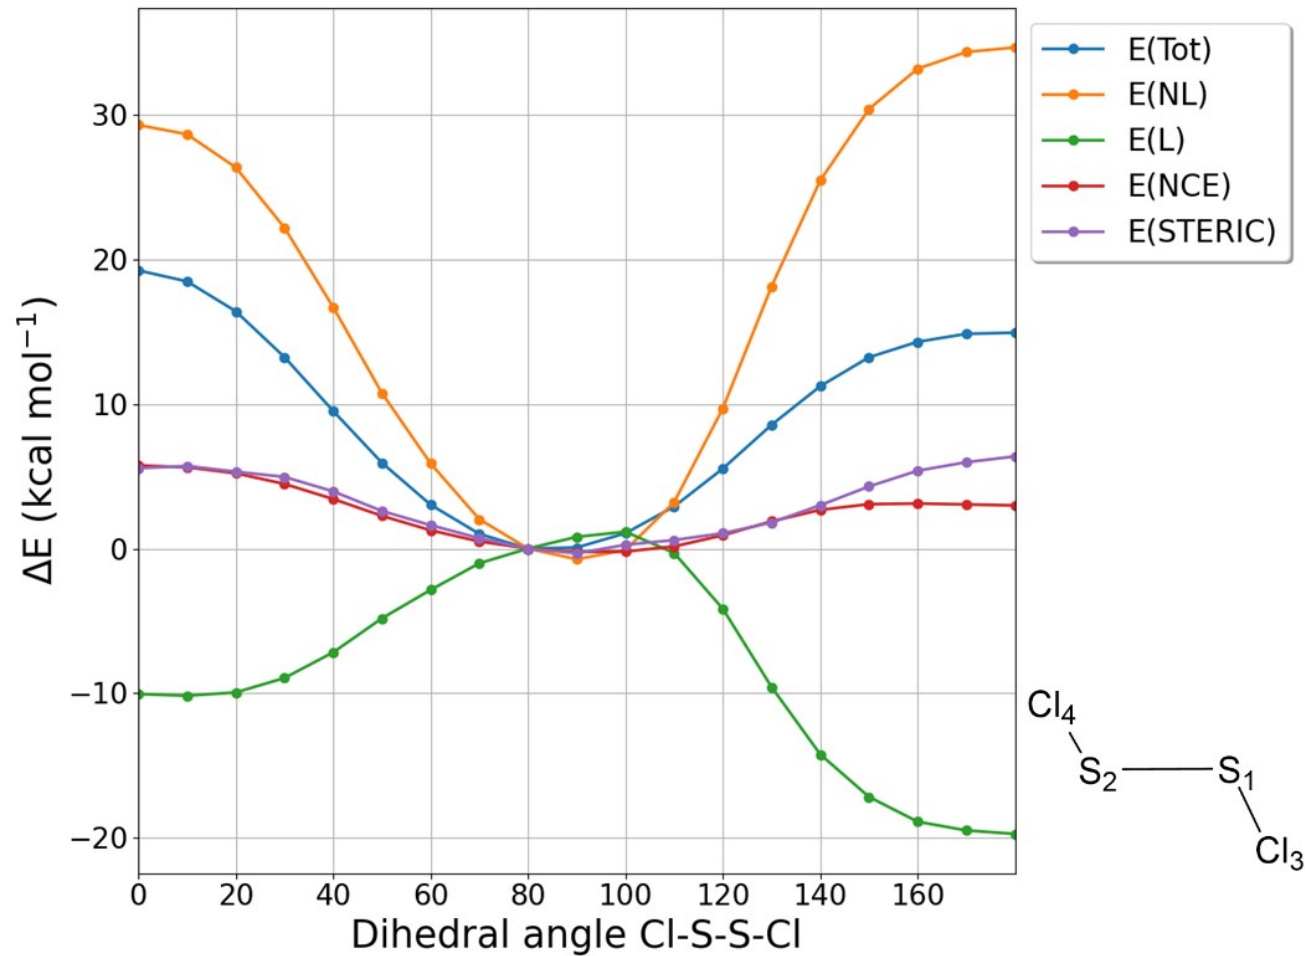

**Figure S23.** NBO deletion analysis calculated for CISSCl at the M06-2X/6-311++G(3df,2p) level.

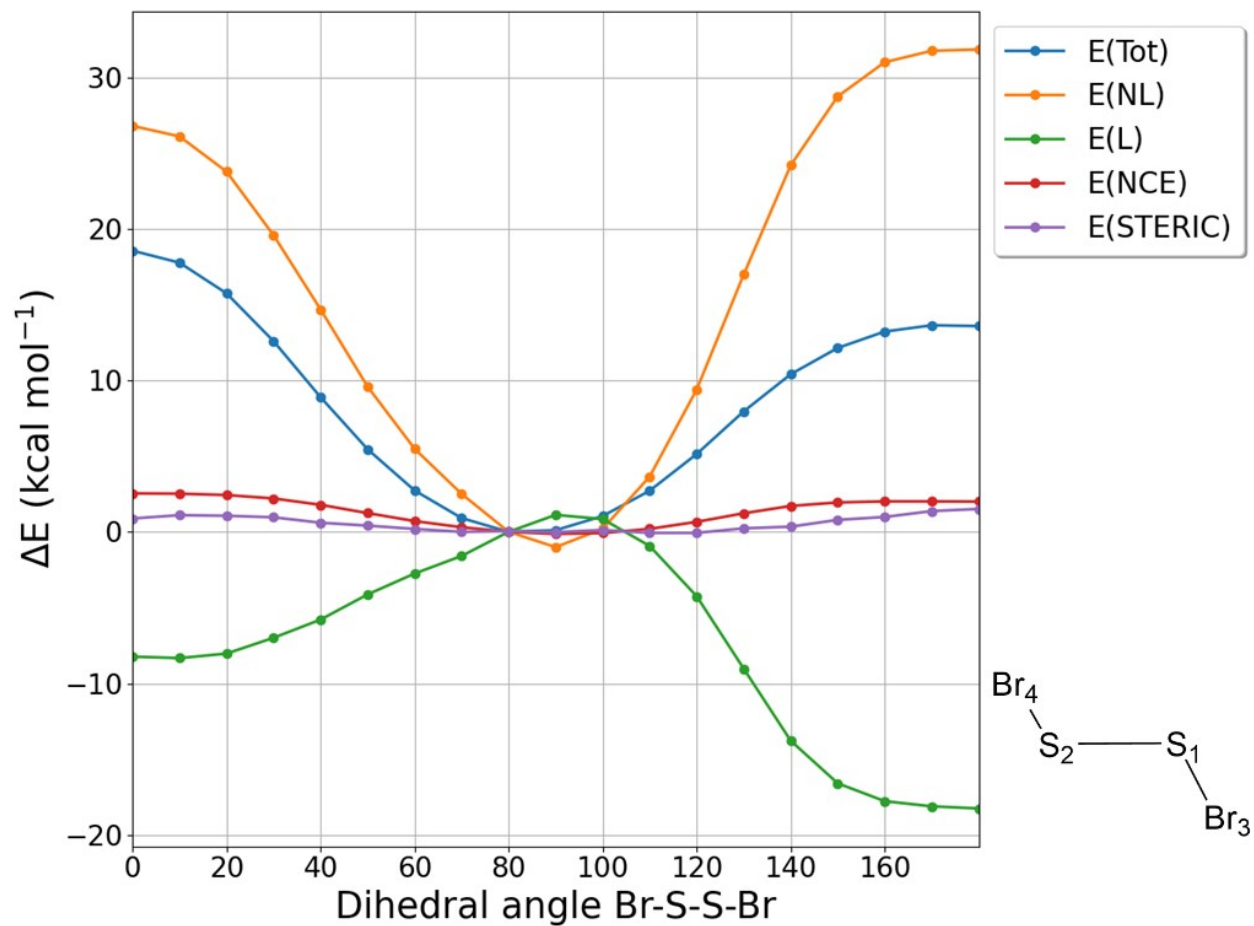

**Figure S24.** NBO deletion analysis calculated for BrSSBr at the M06-2X/6-311++G(3df,2p) level.

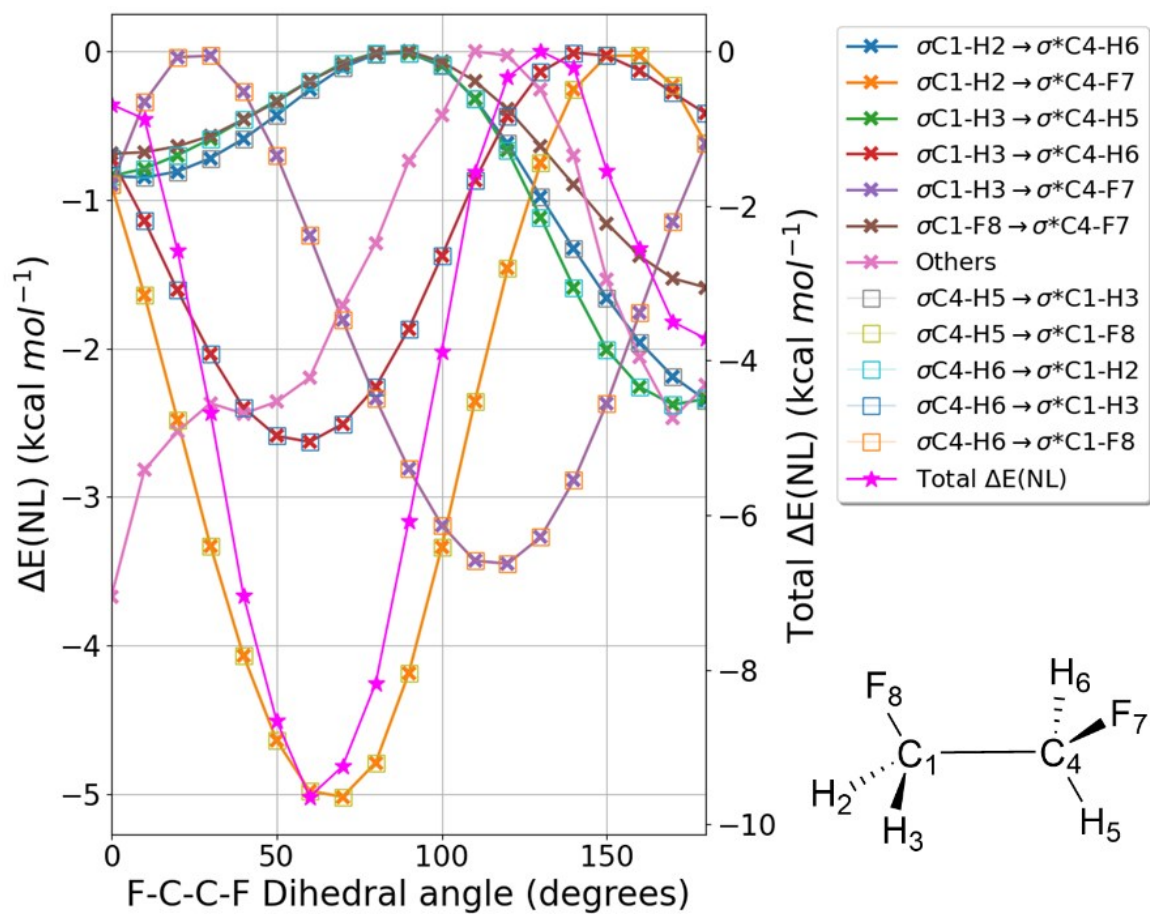

**Figure S25.** Hyperconjugation interaction energies for FCH<sub>2</sub>CH<sub>2</sub>F obtained at the M06-2X/6-311++G(3df,2p) level using NBO analysis.

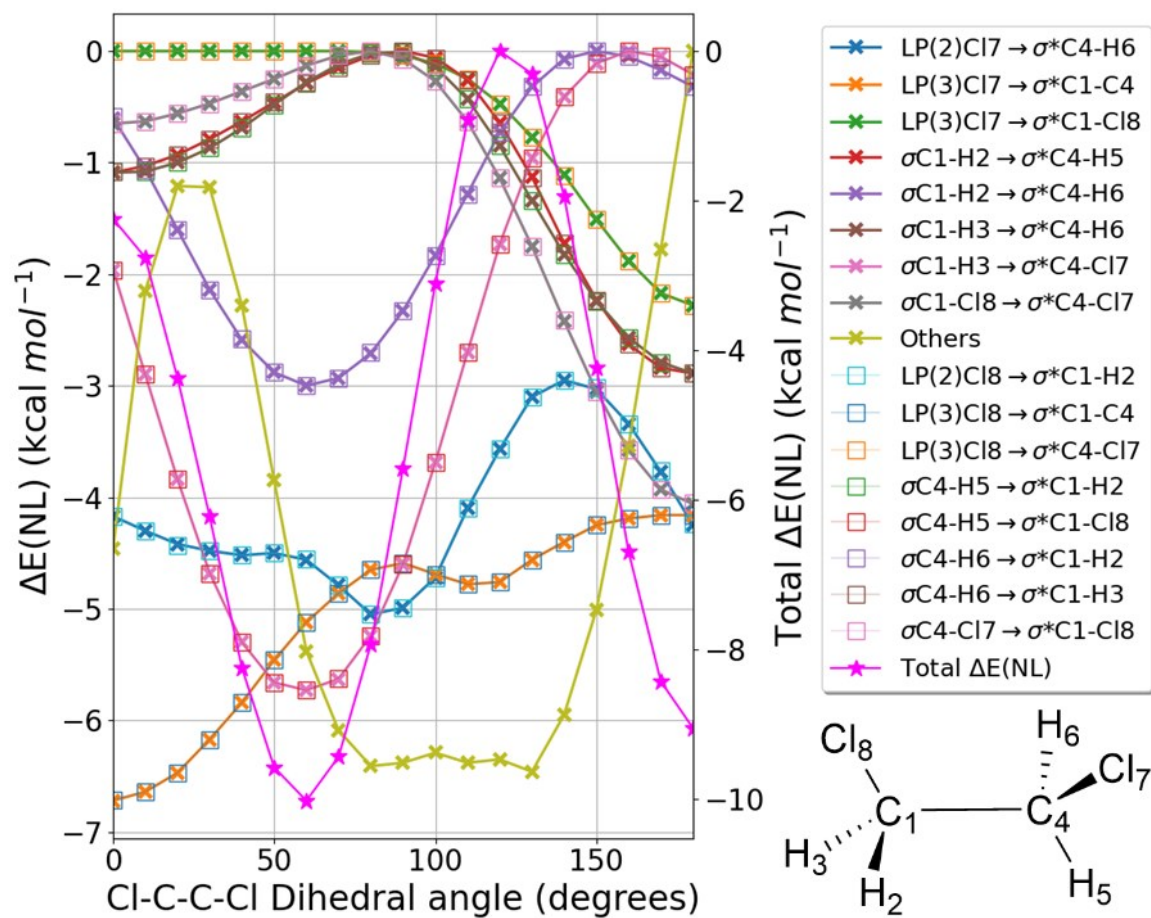

**Figure S26.** Hyperconjugation interaction energies for ClCH<sub>2</sub>CH<sub>2</sub>Cl obtained at the M06-2X/6-311++G(3df,2p) level using NBO analysis.

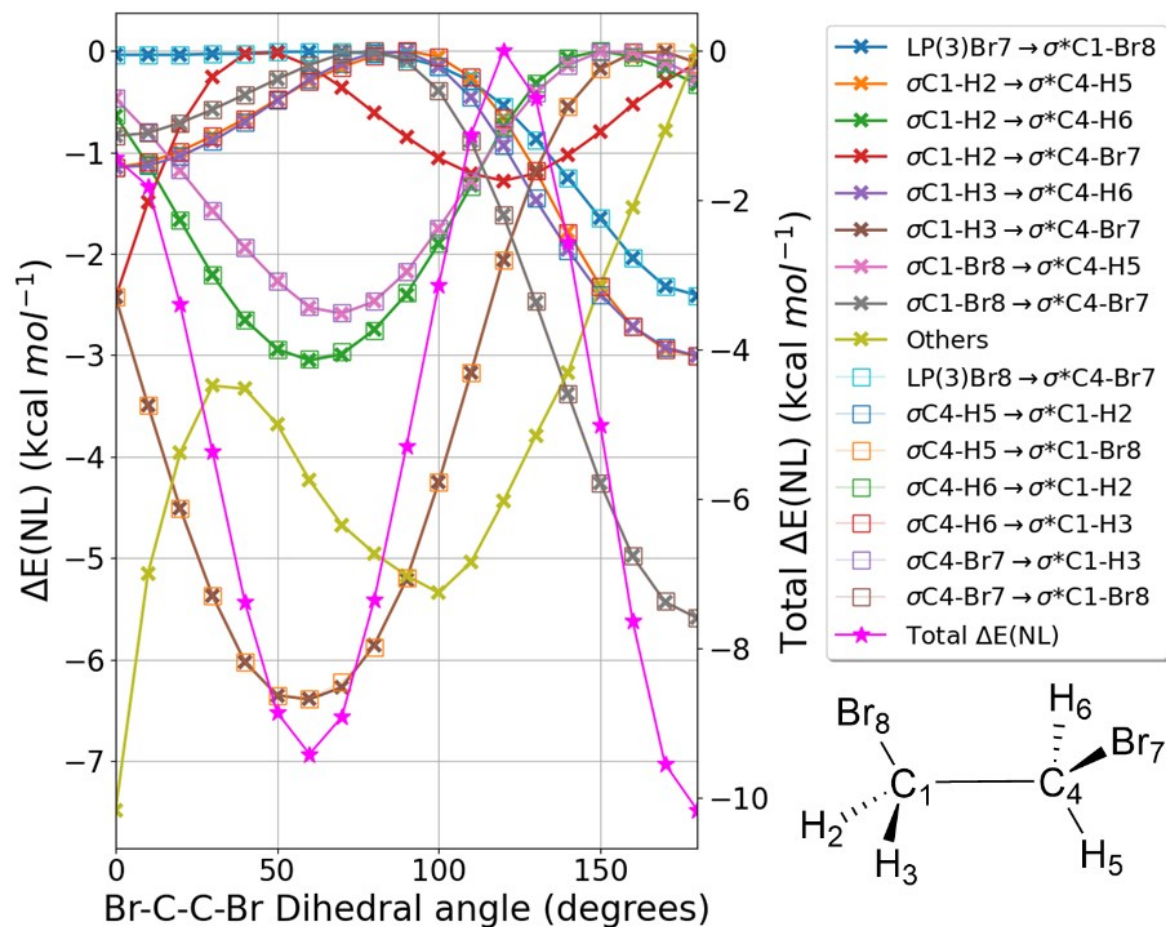

**Figure S27.** Hyperconjugation interaction energies for  $\text{BrCH}_2\text{CH}_2\text{Br}$  obtained at the M06-2X/6-311++G(3df,2p) level using NBO analysis.



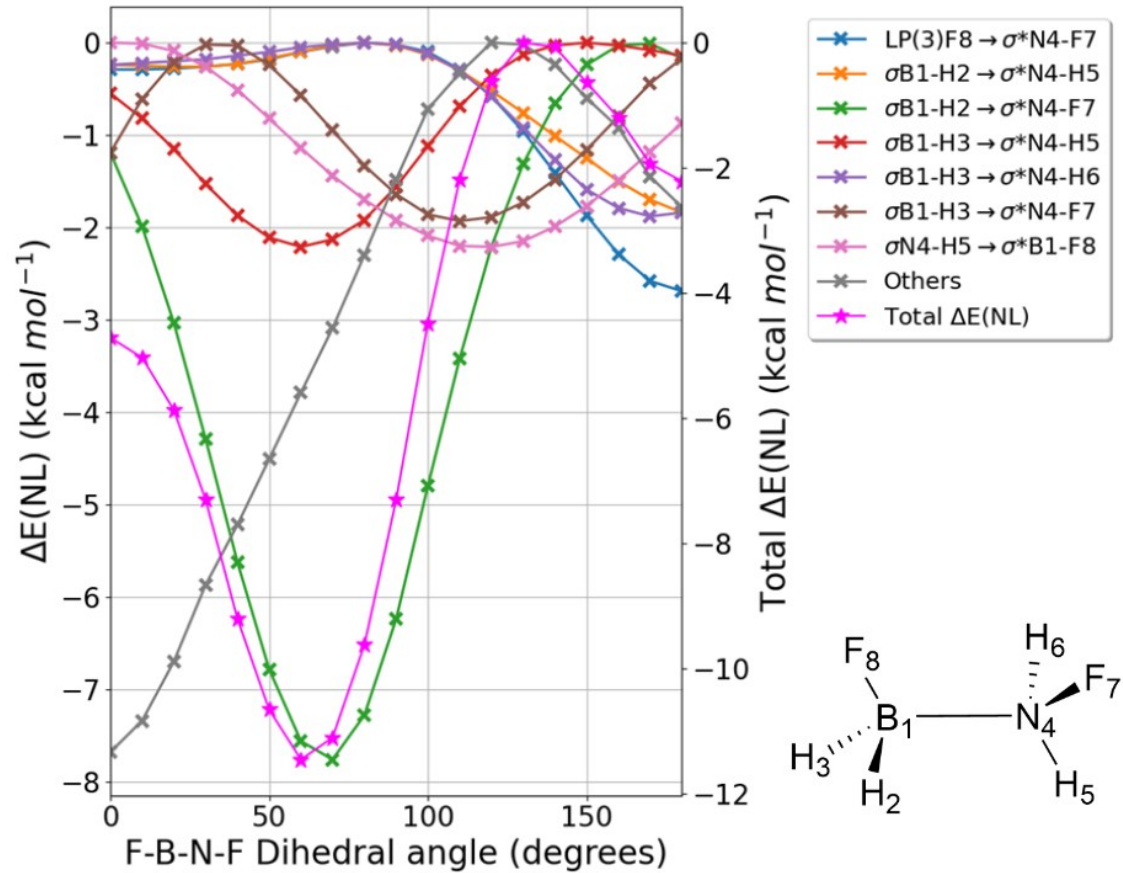

**Figure S28.** Hyperconjugation interaction energies for  $\text{FBH}_2\text{NH}_2\text{F}$  obtained at the M06-2X/6-311++G(3df,2p) level using NBO analysis.



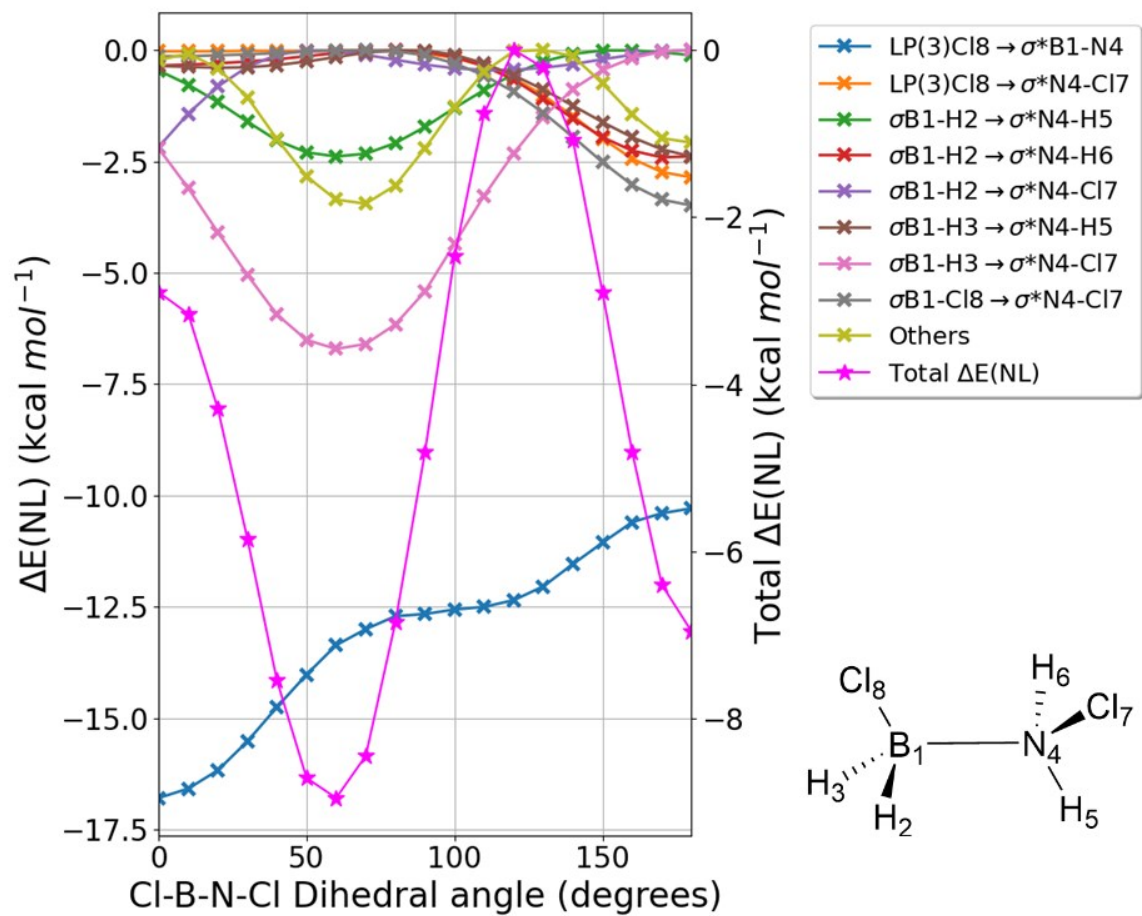

**Figure S29.** Hyperconjugation interaction energies for ClBH<sub>2</sub>NH<sub>2</sub>Cl obtained at the M06-2X/6-311++G(3df,2p) level using NBO analysis.

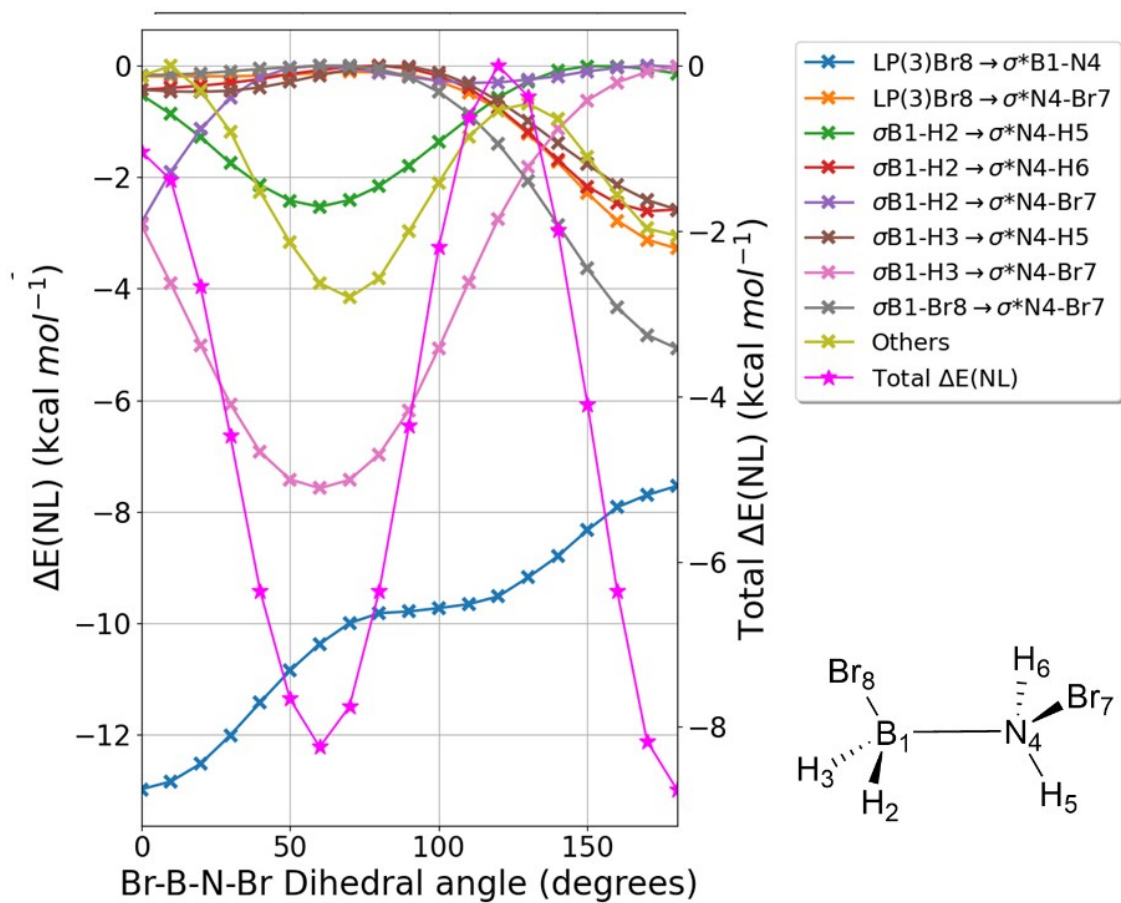

**Figure S30.** Hyperconjugation interaction energies for  $\text{BrBH}_2\text{NH}_2\text{Br}$  obtained at the M06-2X/6-311++G(3df,2p) level using NBO analysis.

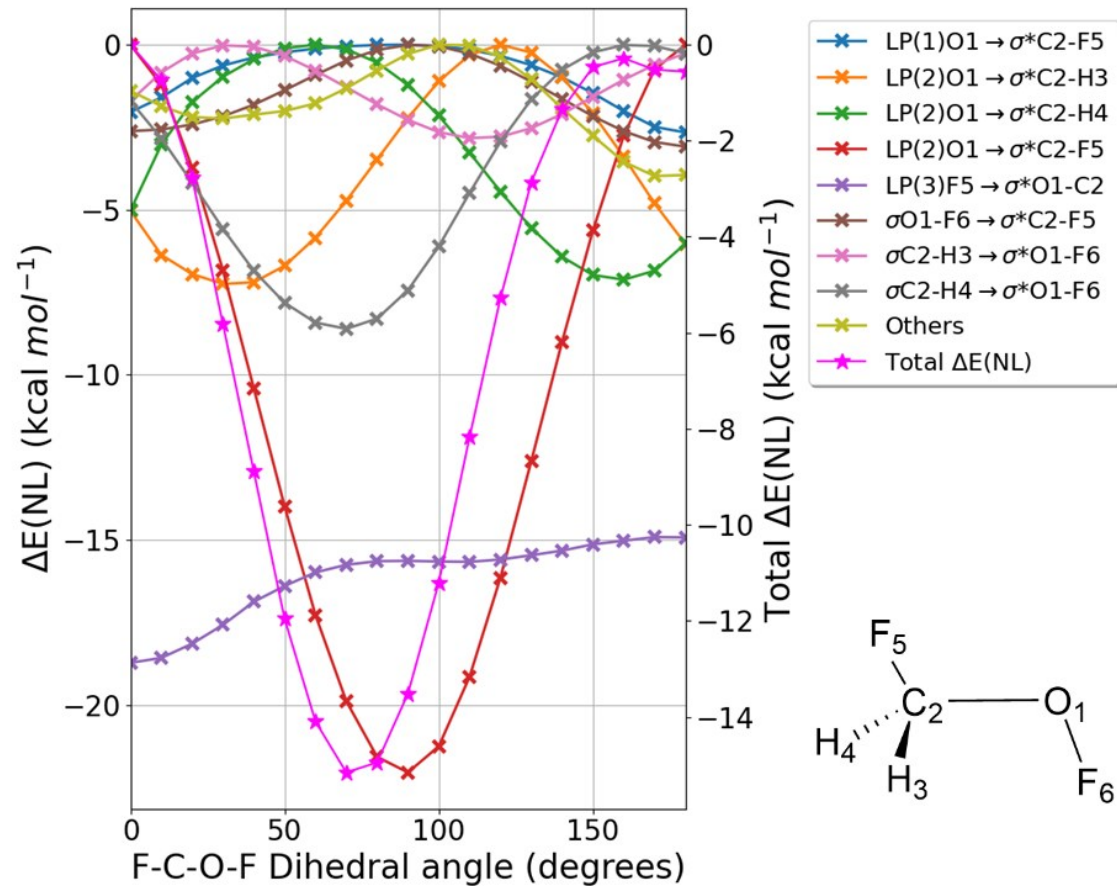

**Figure S31.** Hyperconjugation interaction energies for FCH<sub>2</sub>OF obtained at the M06-2X/6-311++G(3df,2p) level using NBO analysis.

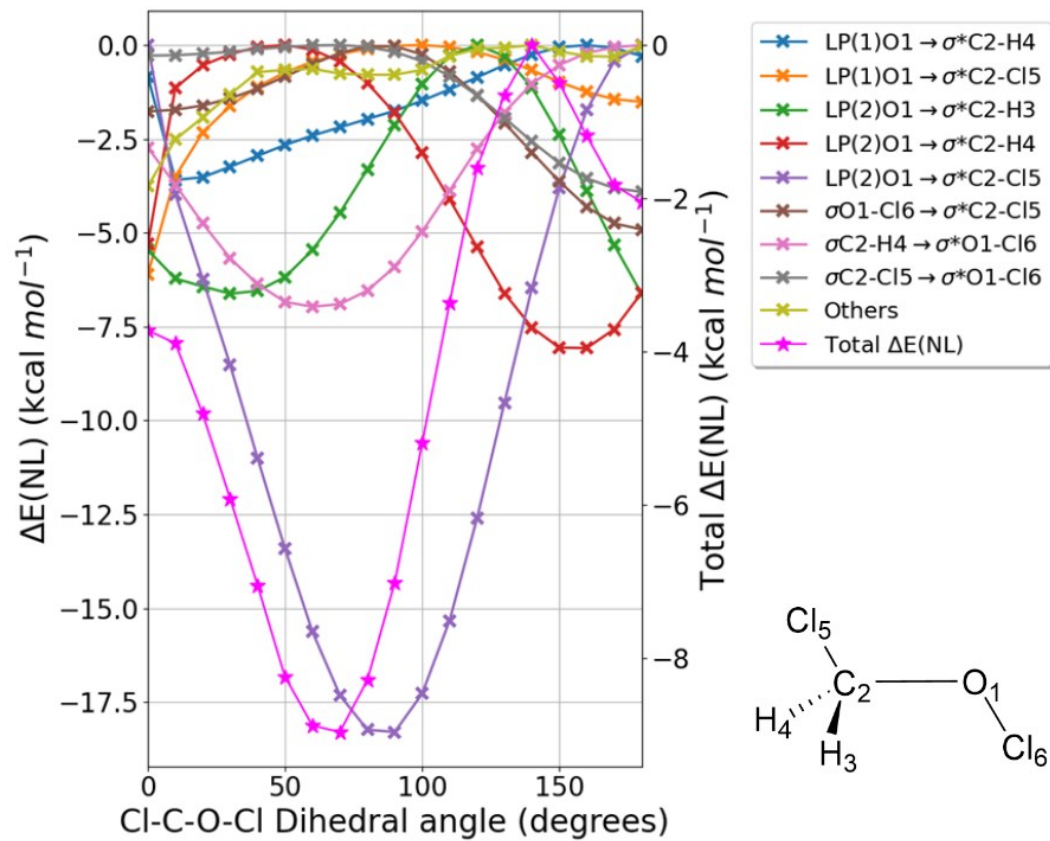

**Figure S32.** Hyperconjugation interaction energies for ClCH<sub>2</sub>OCl obtained at the M06-2X/6-311++G(3df,2p) level using NBO analysis.

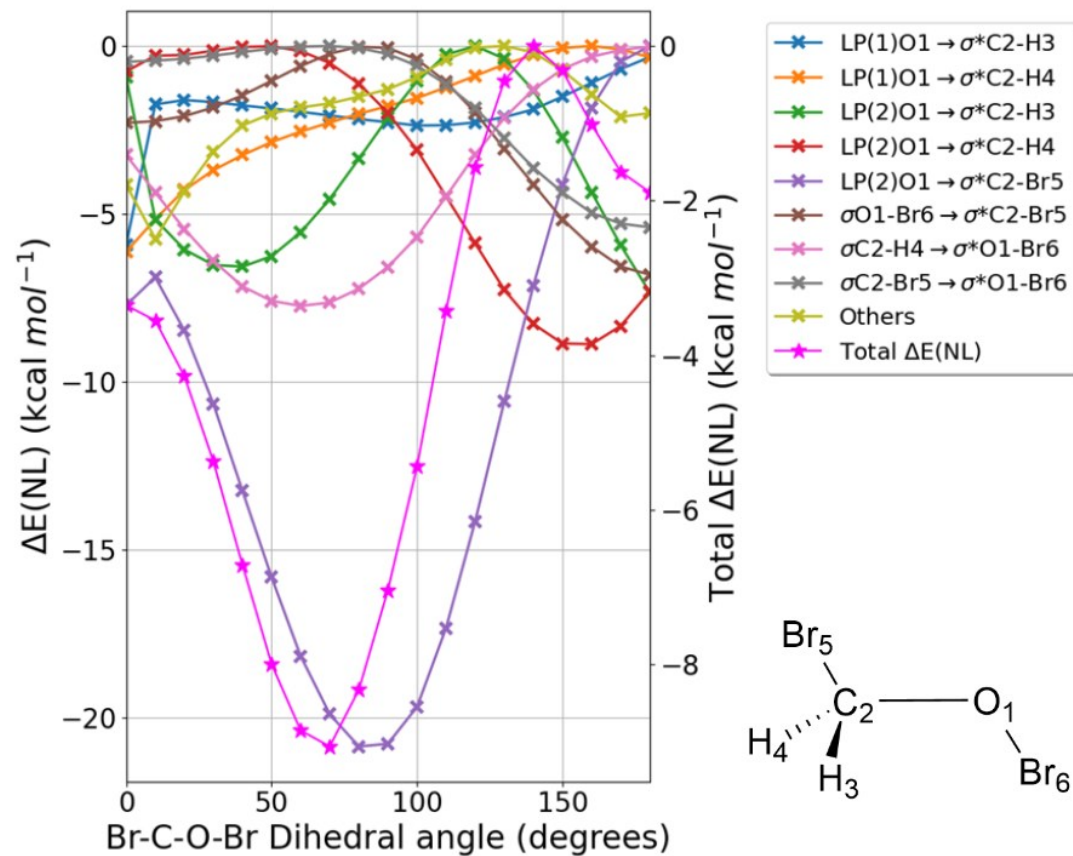

**Figure S33.** Hyperconjugation interaction energies for  $\text{BrCH}_2\text{OBr}$  obtained at the M06-2X/6-311++G(3df,2p) level using NBO analysis.

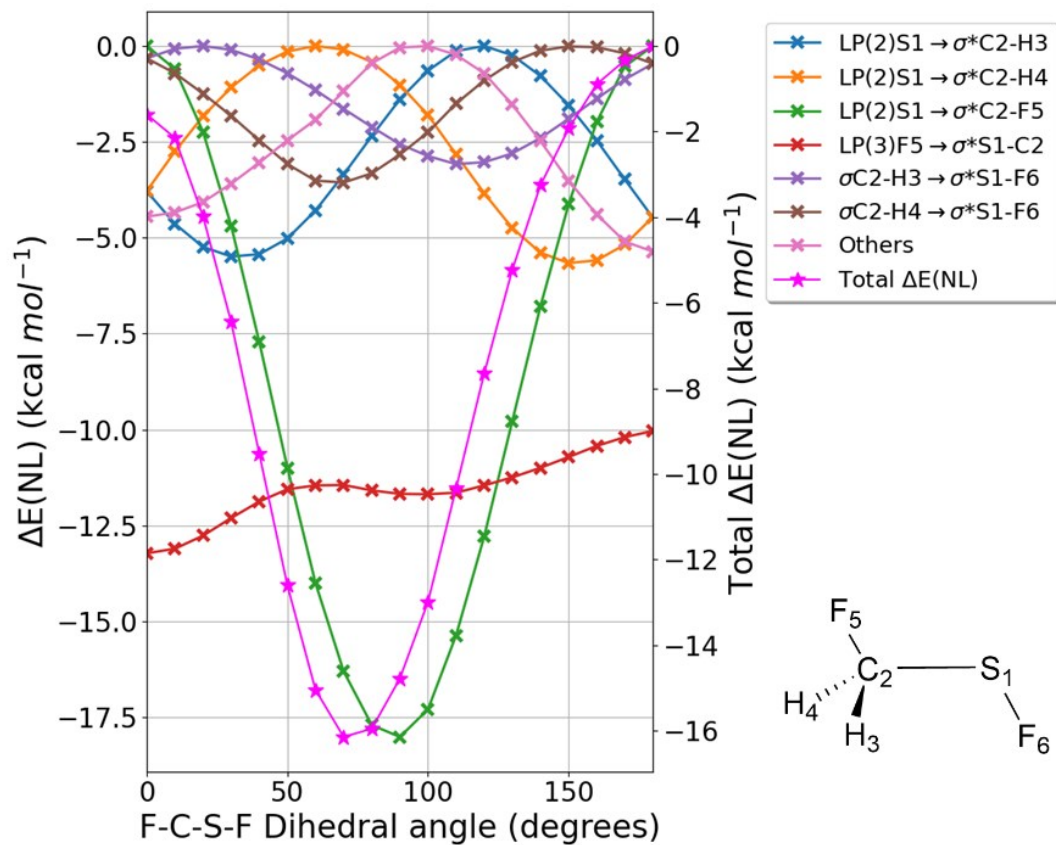

**Figure S34.** Hyperconjugation interaction energies for FCH<sub>2</sub>SF obtained at the M06-2X/6-311++G(3df,2p) level using NBO analysis.

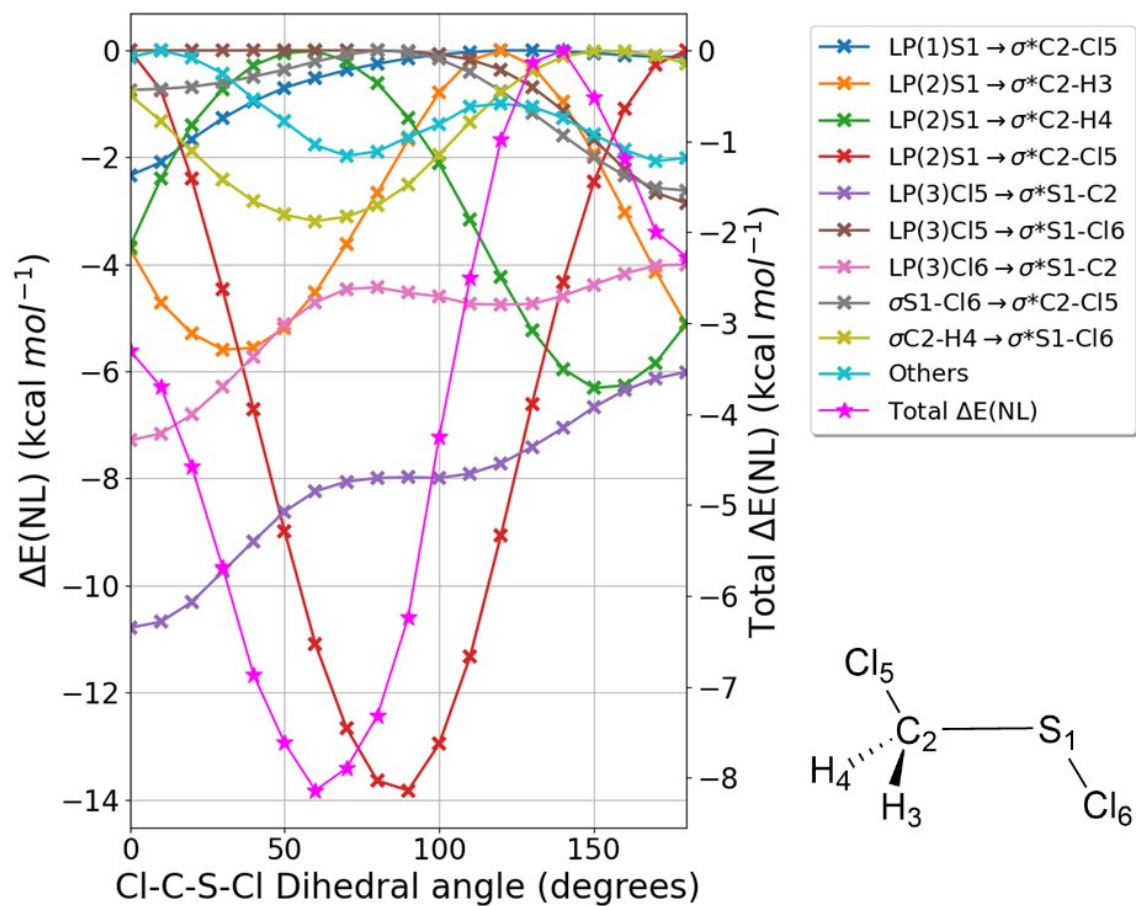

**Figure S35.** Hyperconjugation interaction energies for ClCH<sub>2</sub>SCl obtained at the M06-2X/6-311++G(3df,2p) level using NBO analysis.



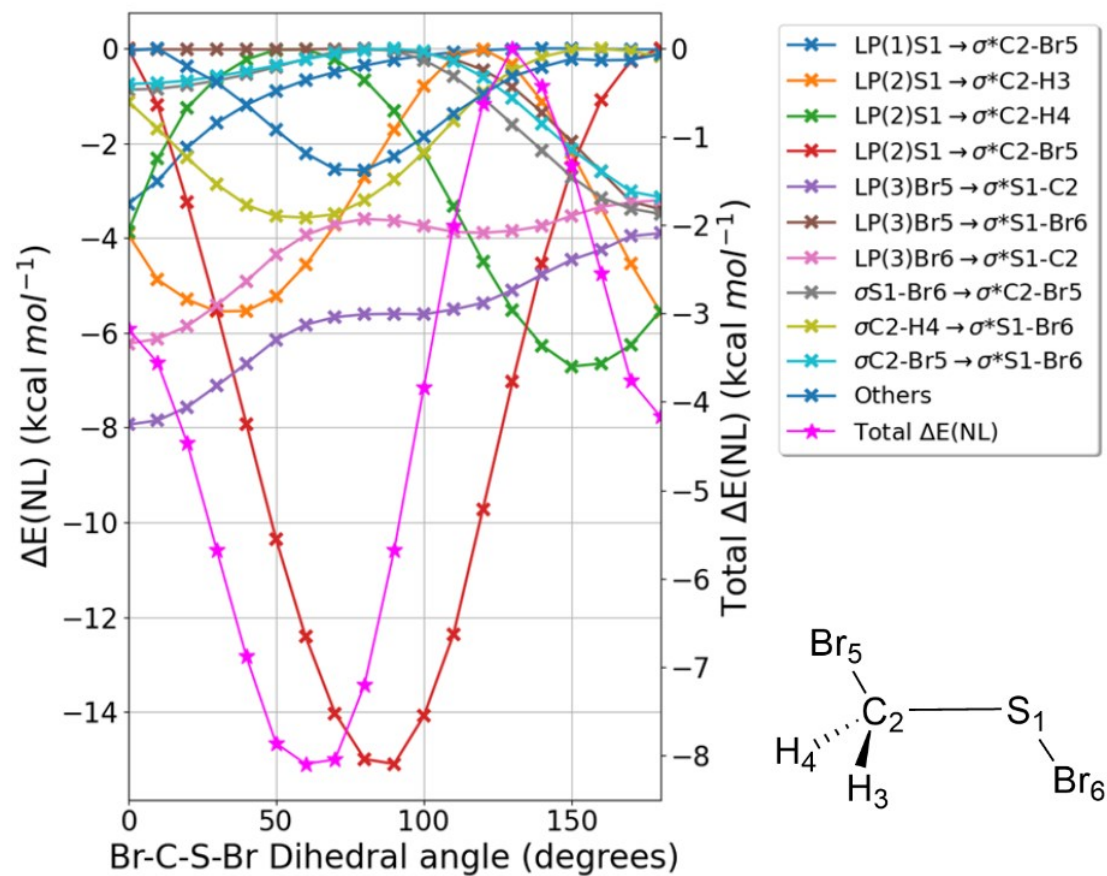

**Figure S36.** Hyperconjugation interaction energies for BrCH<sub>2</sub>SBr obtained at the M06-2X/6-311++G(3df,2p) level using NBO analysis.



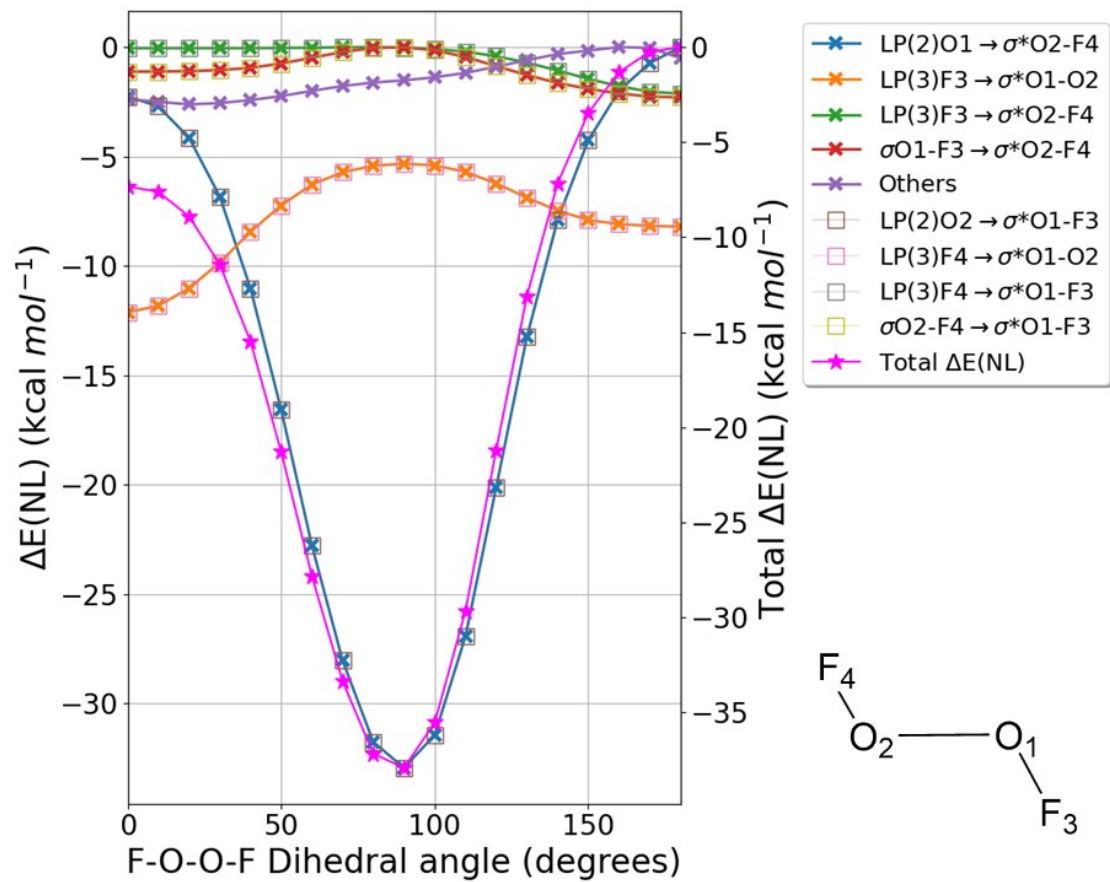

**Figure S37.** Hyperconjugation interaction energies for FOOF obtained at the M06-2X/6-311++G(3df,2p) level using NBO analysis.

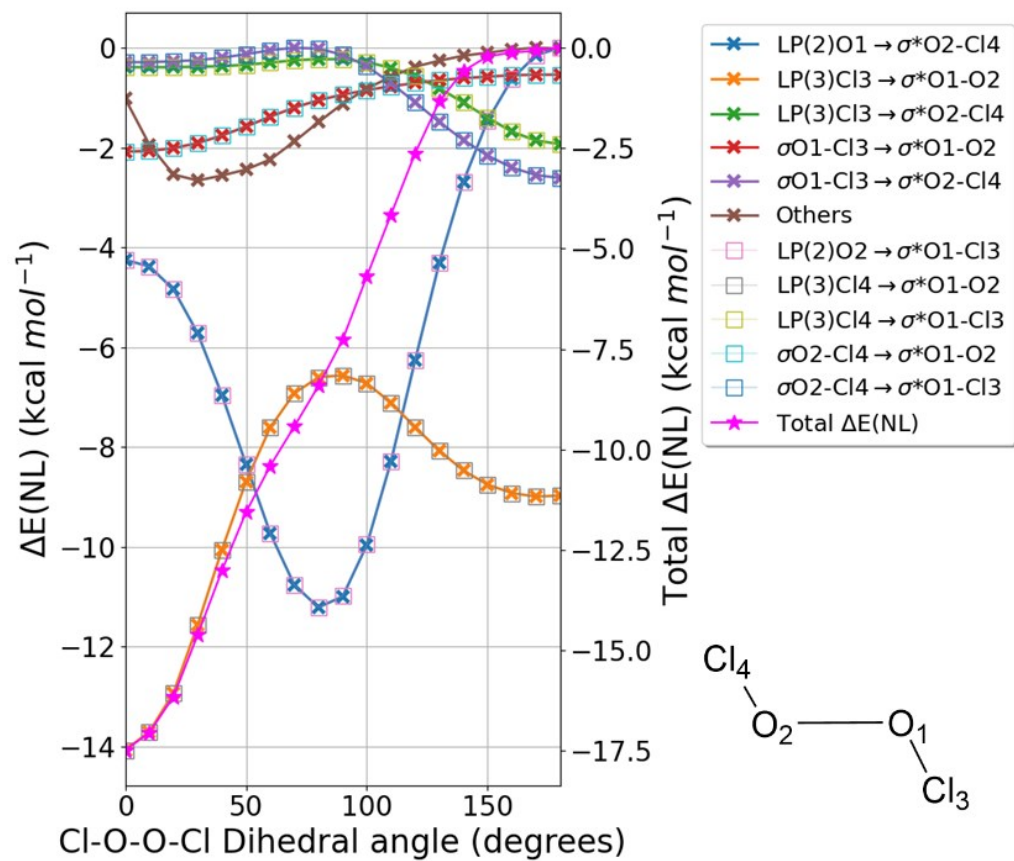

**Figure S38.** Hyperconjugation interaction energies for ClOOCl obtained at the M06-2X/6-311++G(3df,2p) level using NBO analysis.

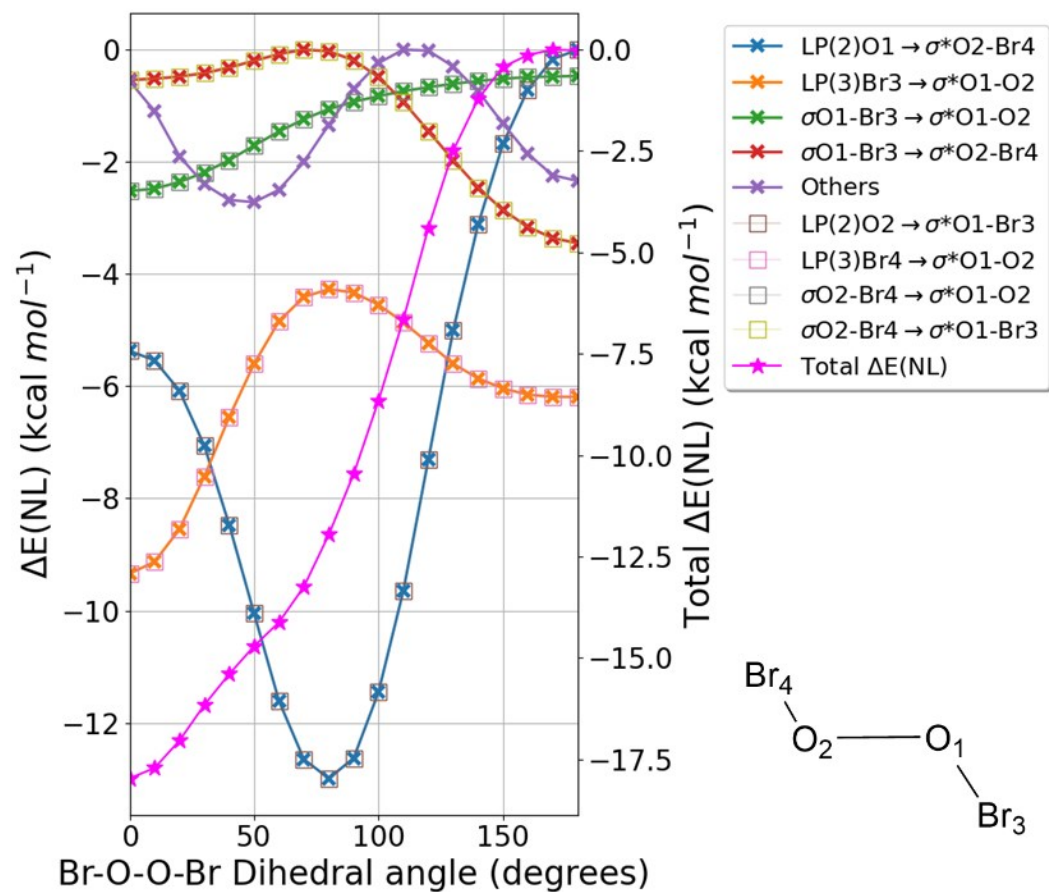

**Figure S39.** Hyperconjugation interaction energies for BrOOBr obtained at the M06-2X/6-311++G(3df,2p) level using NBO analysis.

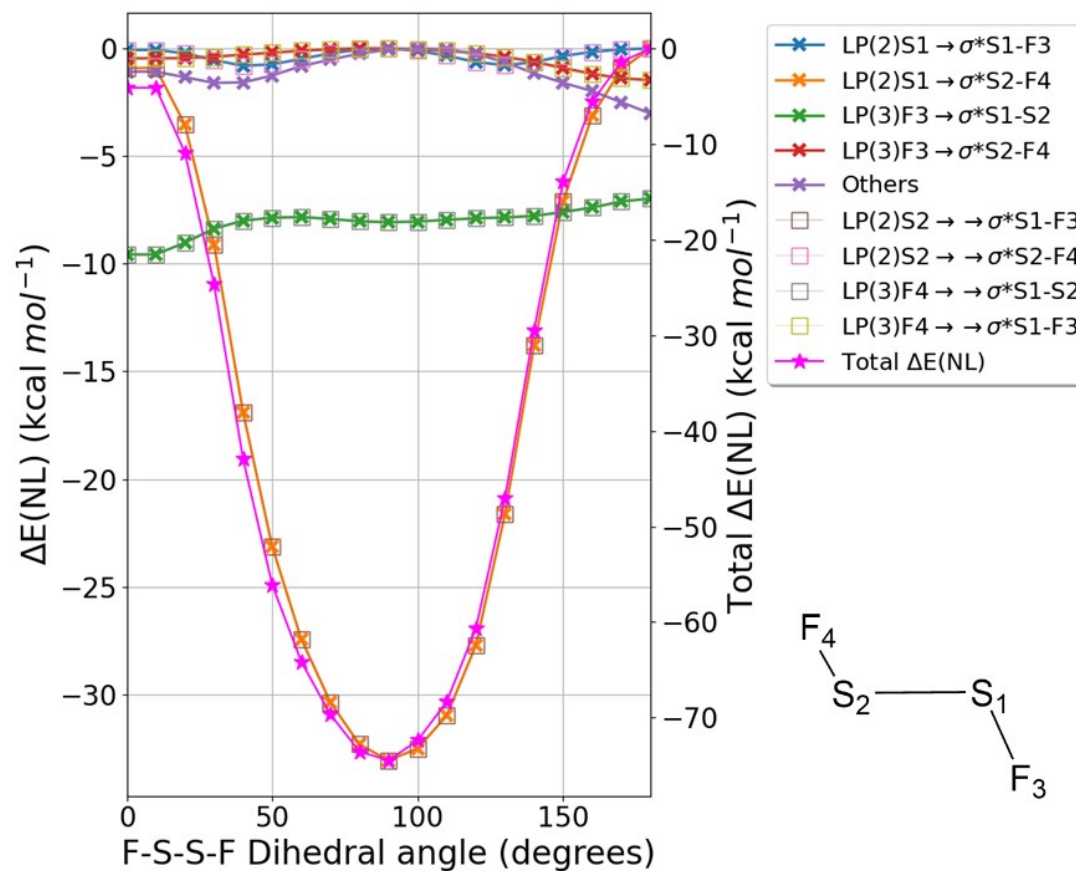

**Figure S40.** Hyperconjugation interaction energies for FSSF obtained at the M06-2X/6-311++G(3df,2p) level using NBO analysis.

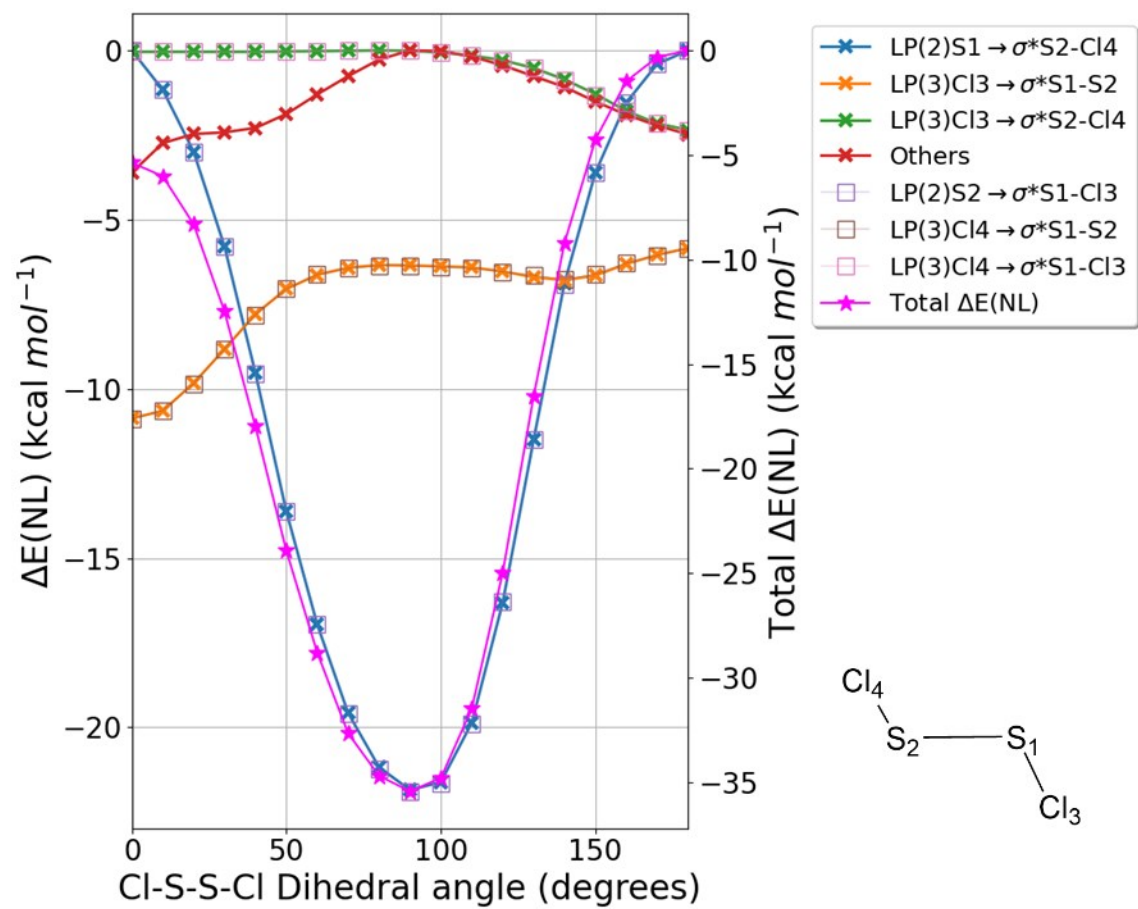

**Figure S41.** Hyperconjugation interaction energies for ClSSCl obtained at the M06-2X/6-311++G(3df,2p) level using NBO analysis.

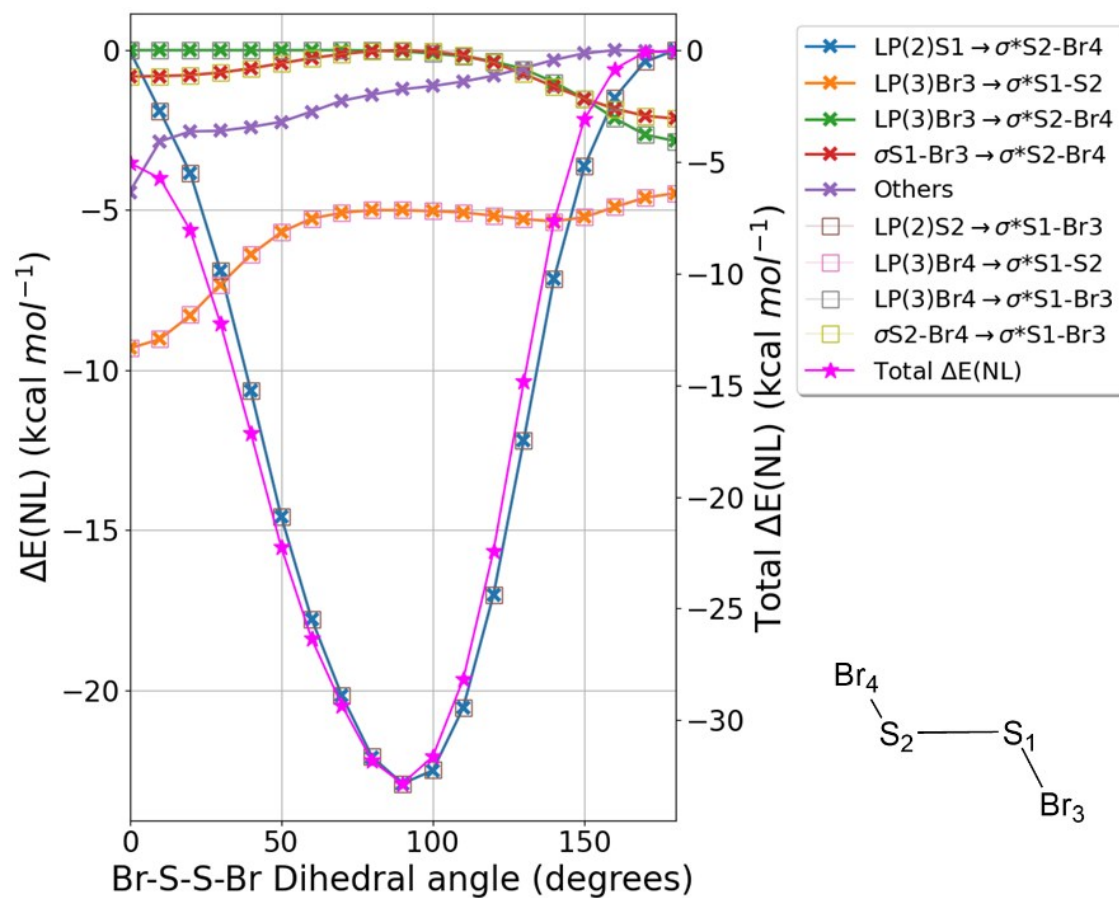

**Figure S42.** Hyperconjugation interaction energies for BrSSBr obtained at the M06-2X/6-311++G(3df,2p) level using NBO analysis.

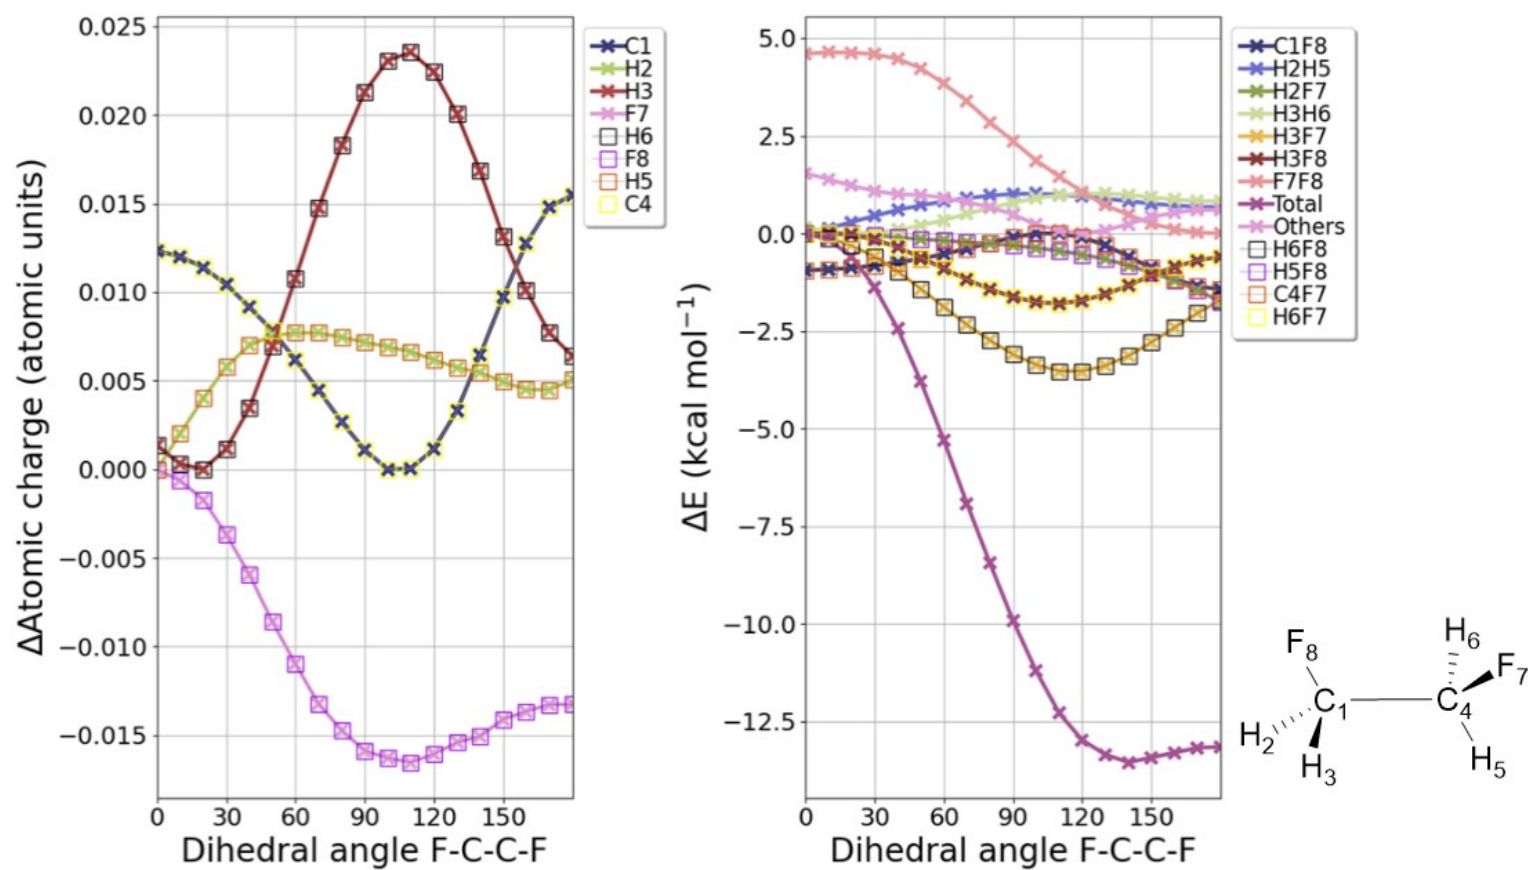

**Figure S43.** Atomic charges and natural Coulomb electrostatic (NCE) energy curves for FCH<sub>2</sub>CH<sub>2</sub>F calculated at the M06-2X/6-311++G(3df,2p) level.



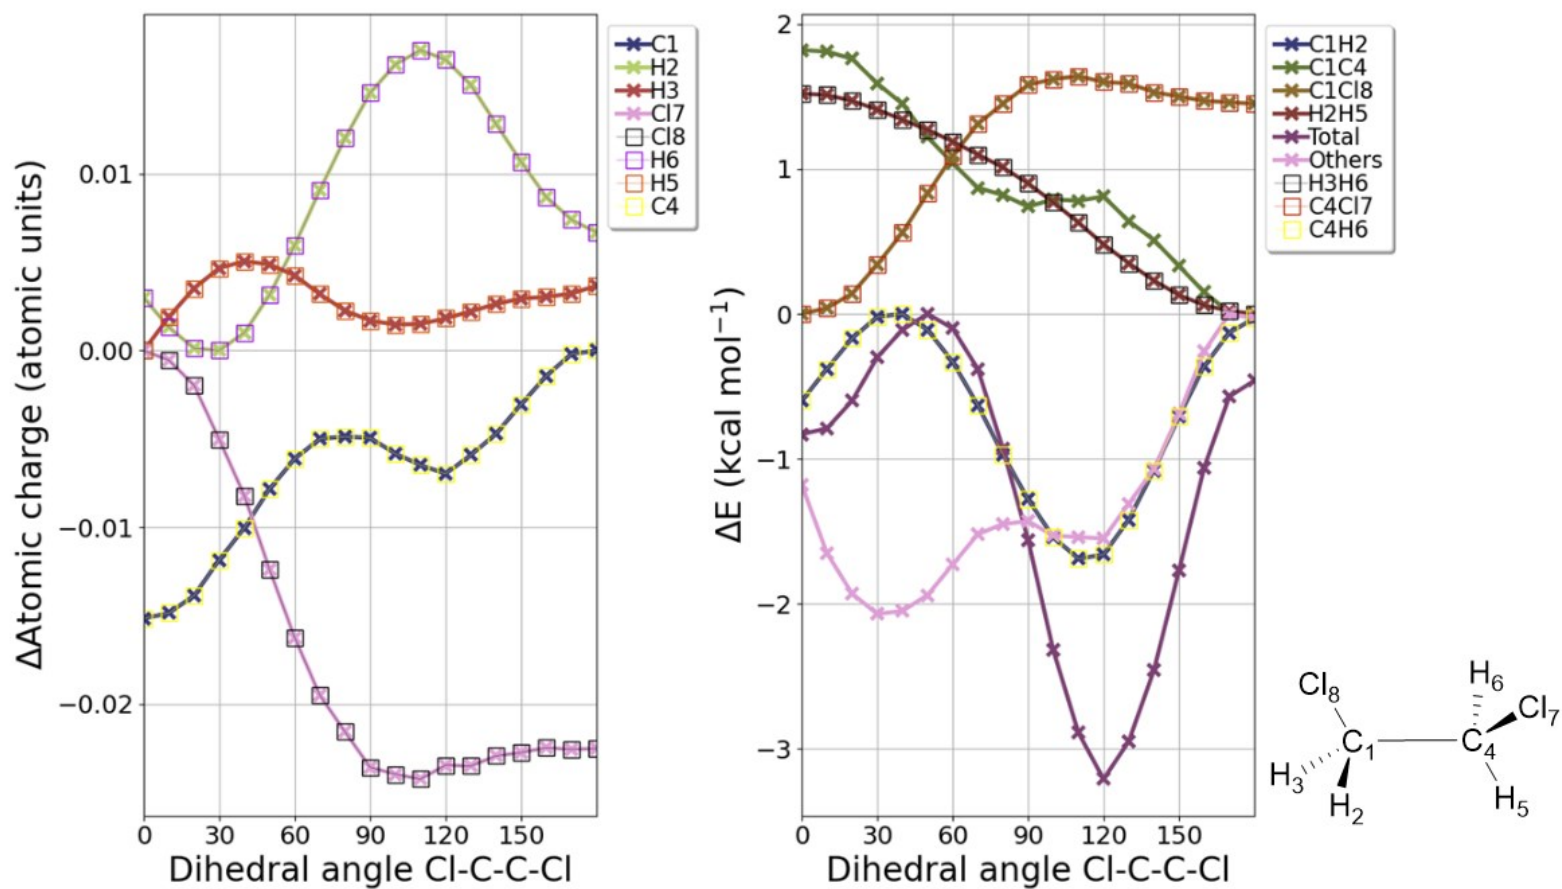

**Figure S44.** Atomic charges and natural Coulomb electrostatic (NCE) energy curves for ClCH<sub>2</sub>CH<sub>2</sub>Cl calculated at the M06-2X/6-311++G(3df,2p) level.



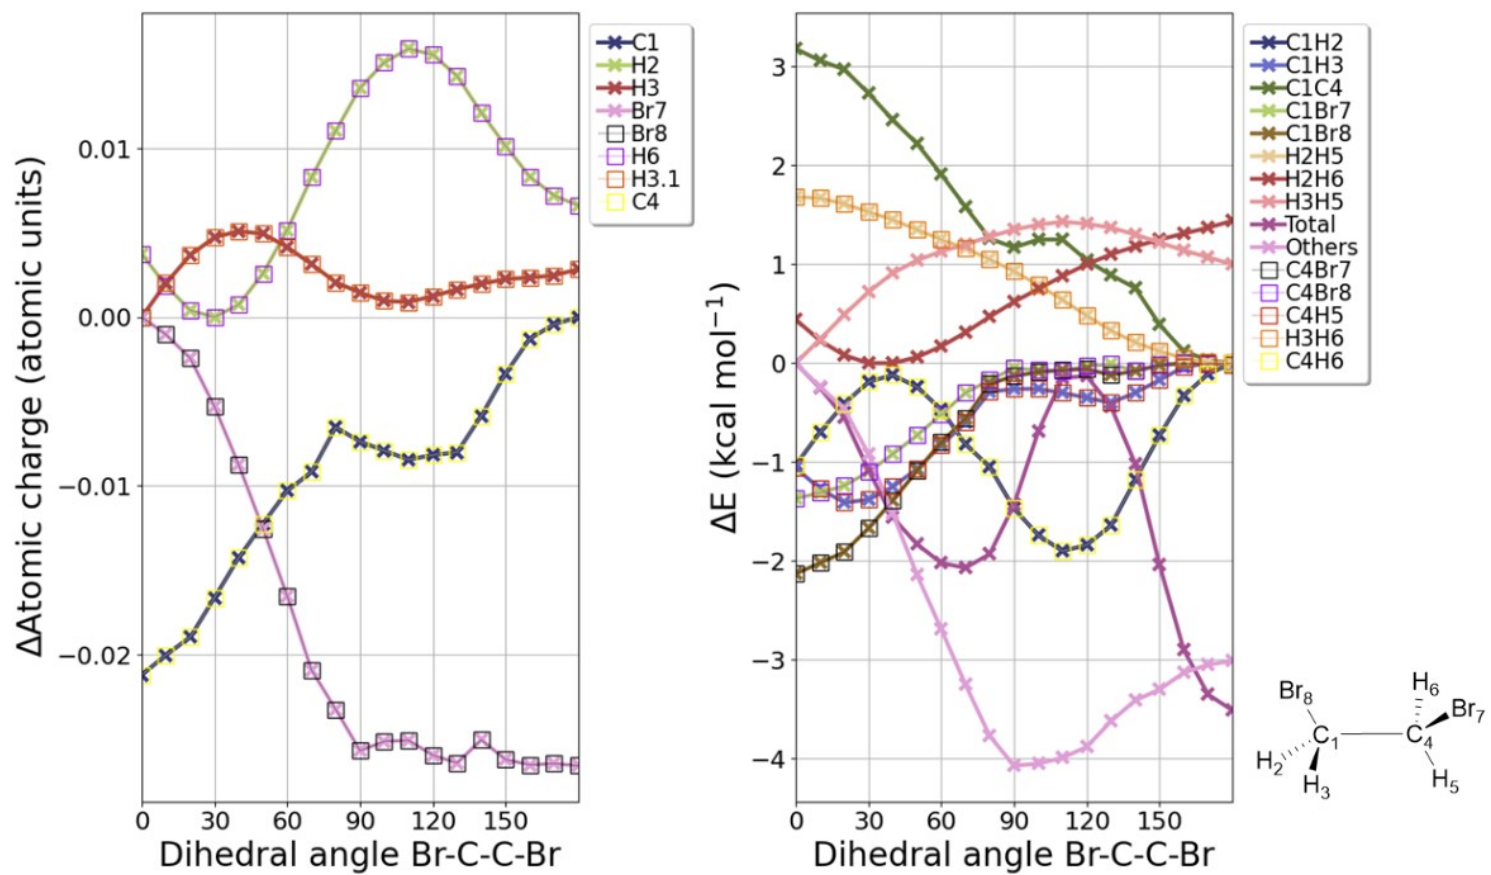

**Figure S45.** Atomic charges and natural Coulomb electrostatic (NCE) energy curves for BrCH<sub>2</sub>CH<sub>2</sub>Br calculated at the M06-2X/6-311++G(3df,2p) level.

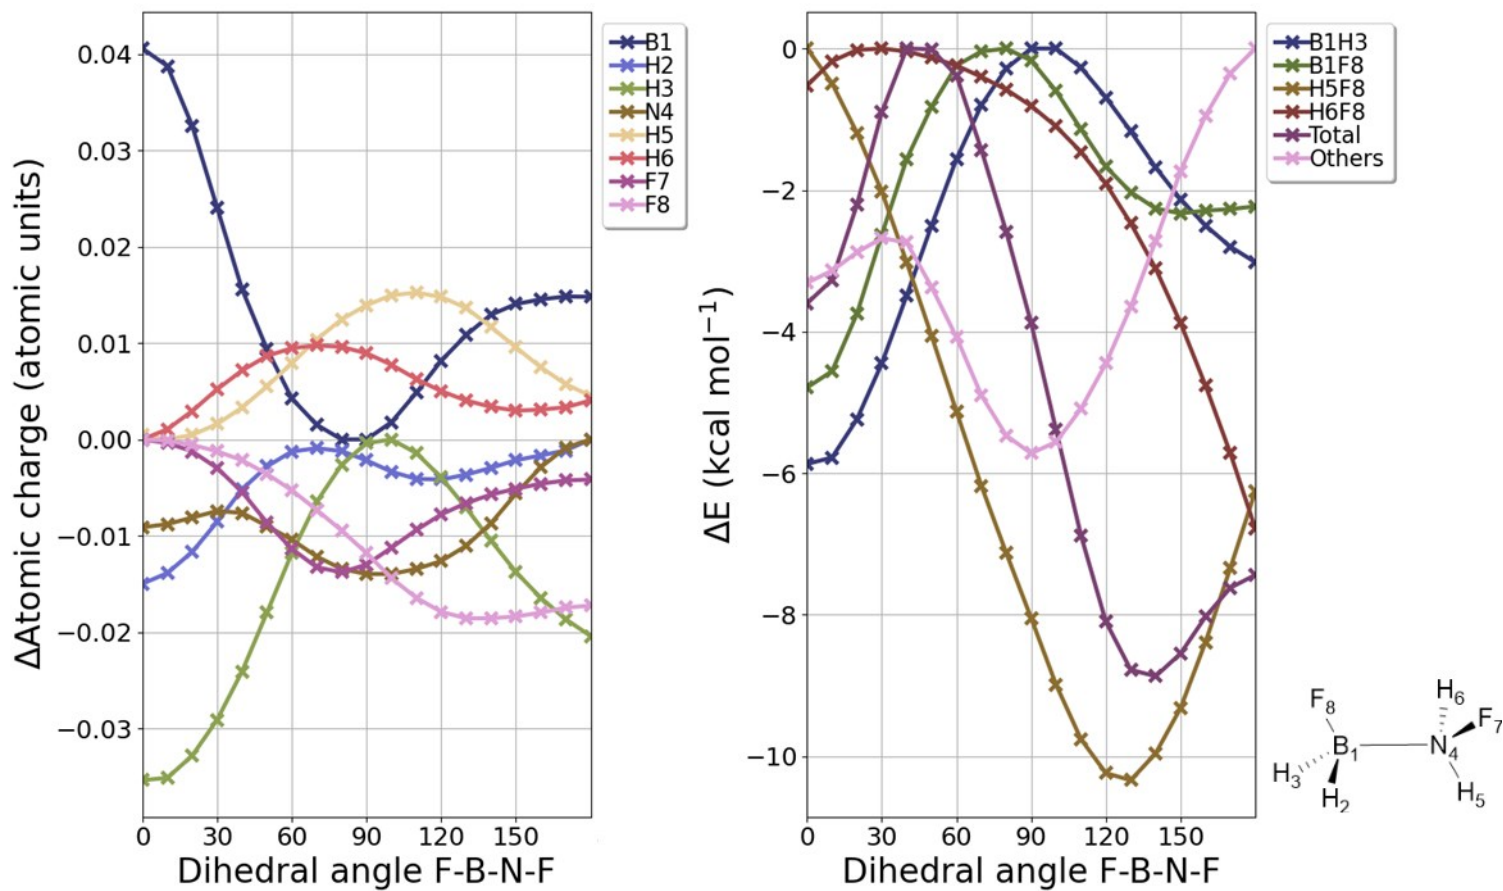

**Figure S46.** Atomic charges and natural Coulomb electrostatic (NCE) energy curves for FBH<sub>2</sub>NH<sub>2</sub>F calculated at the M06-2X/6-311++G(3df,2p) level.

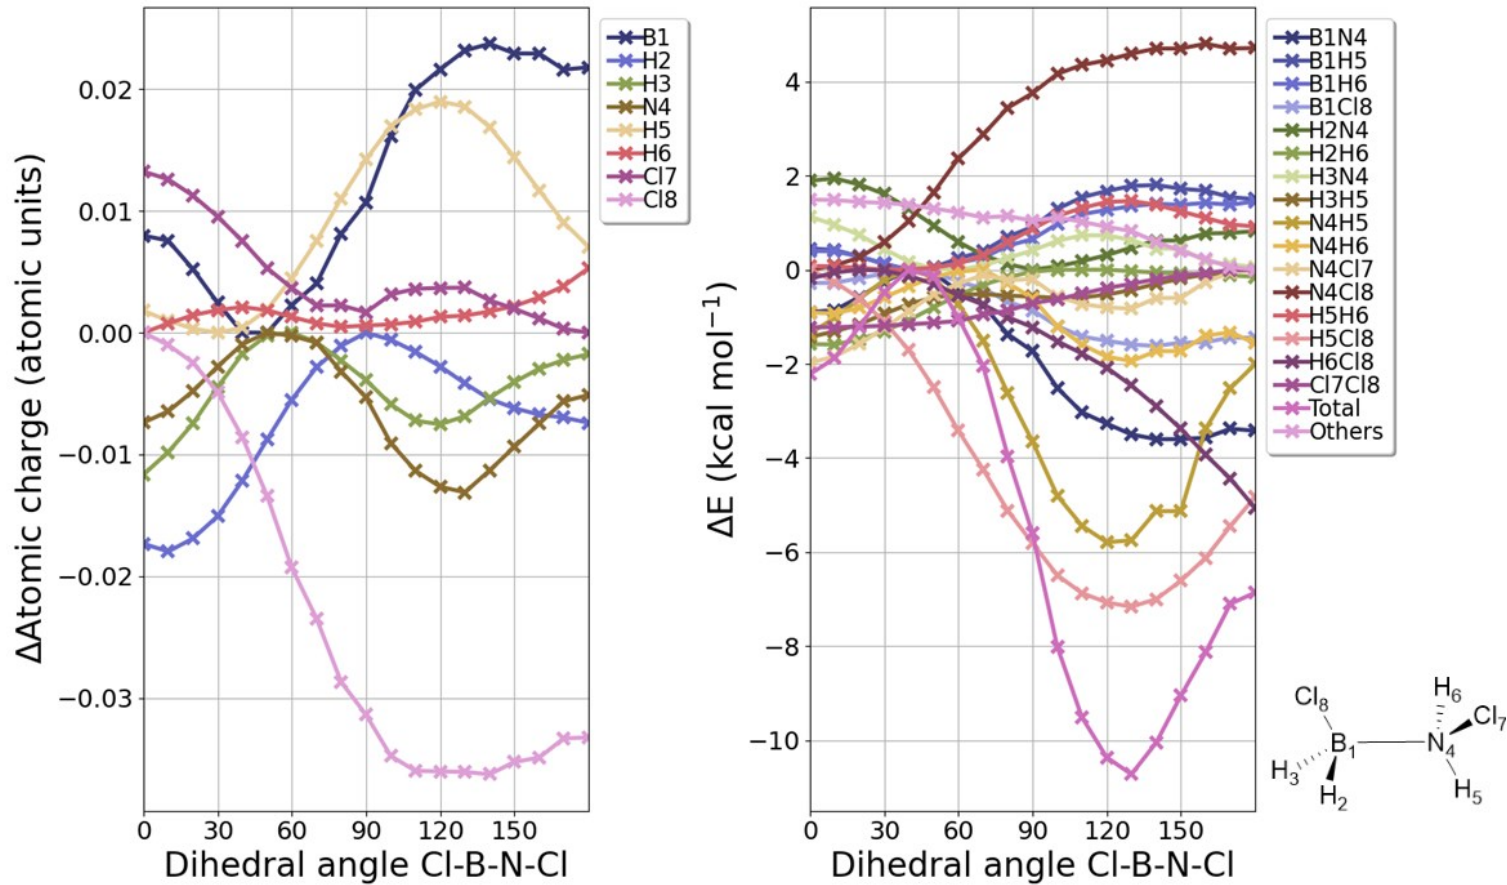

**Figure S47.** Atomic charges and natural Coulomb electrostatic (NCE) energy curves for ClBH<sub>2</sub>NH<sub>2</sub>Cl calculated at the M06-2X/6-311++G(3df,2p) level.

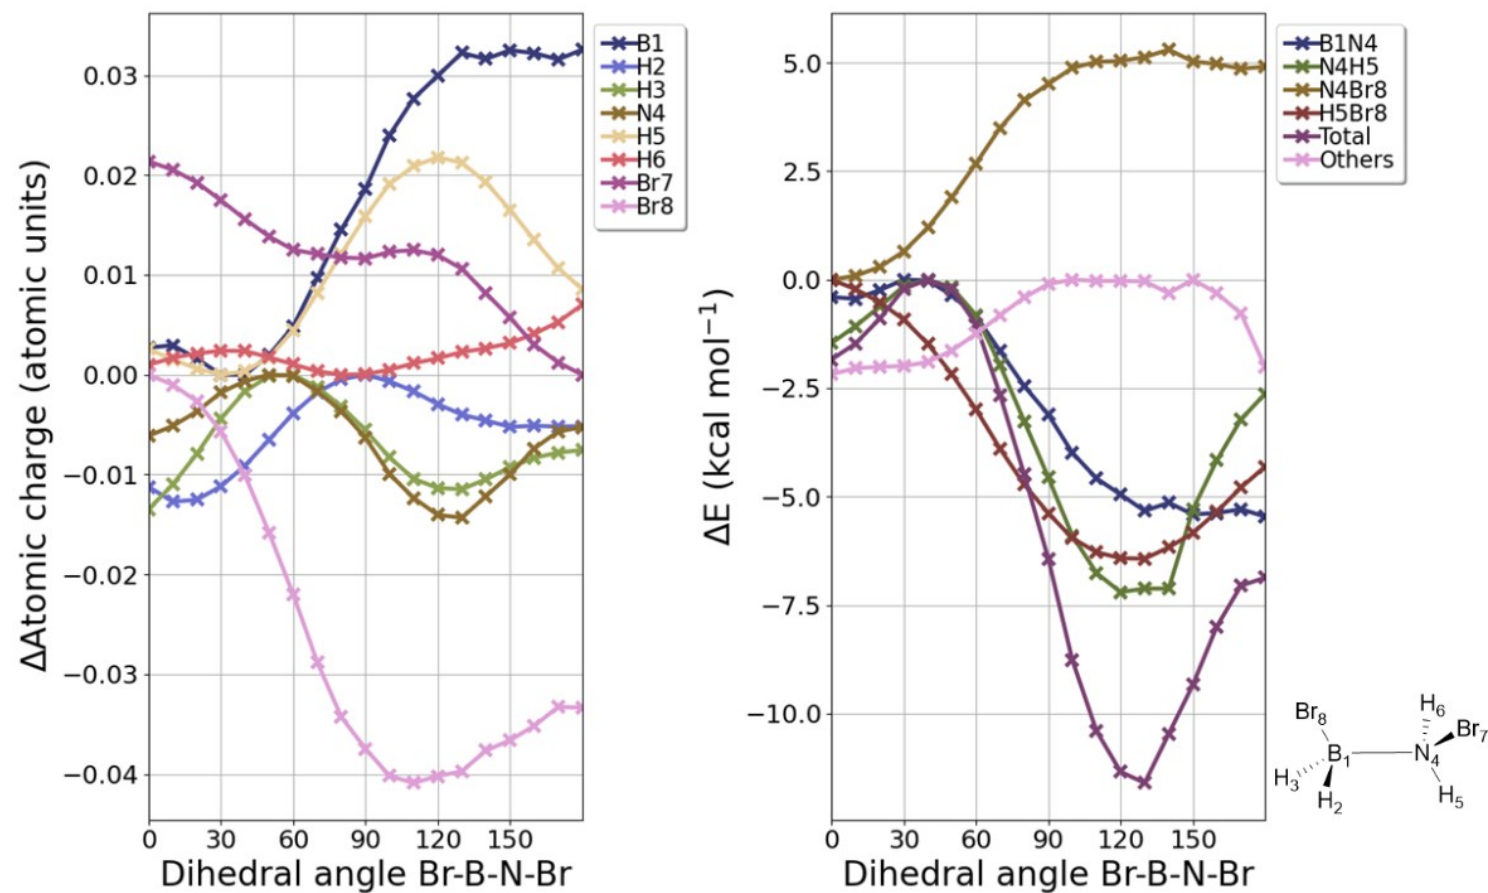

**Figure S48.** Atomic charges and natural Coulomb electrostatic (NCE) energy curves for  $\text{BrBH}_2\text{NH}_2\text{Br}$  calculated at the M06-2X/6-311++G(3df,2p) level.

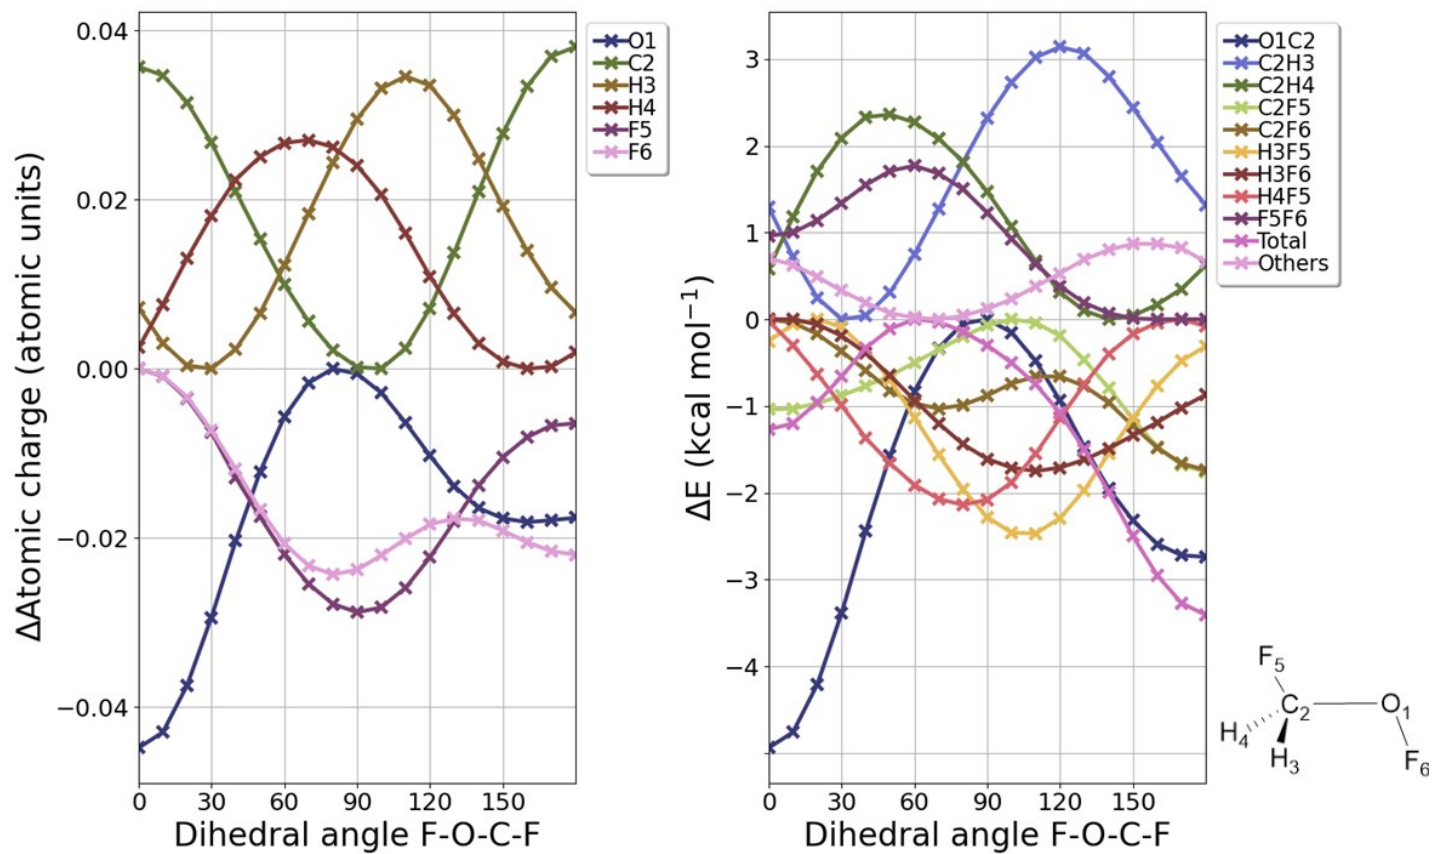

**Figure S49.** Atomic charges and natural Coulomb electrostatic (NCE) energy curves for FCH<sub>2</sub>OF calculated at the M06-2X/6-311++G(3df,2p) level.



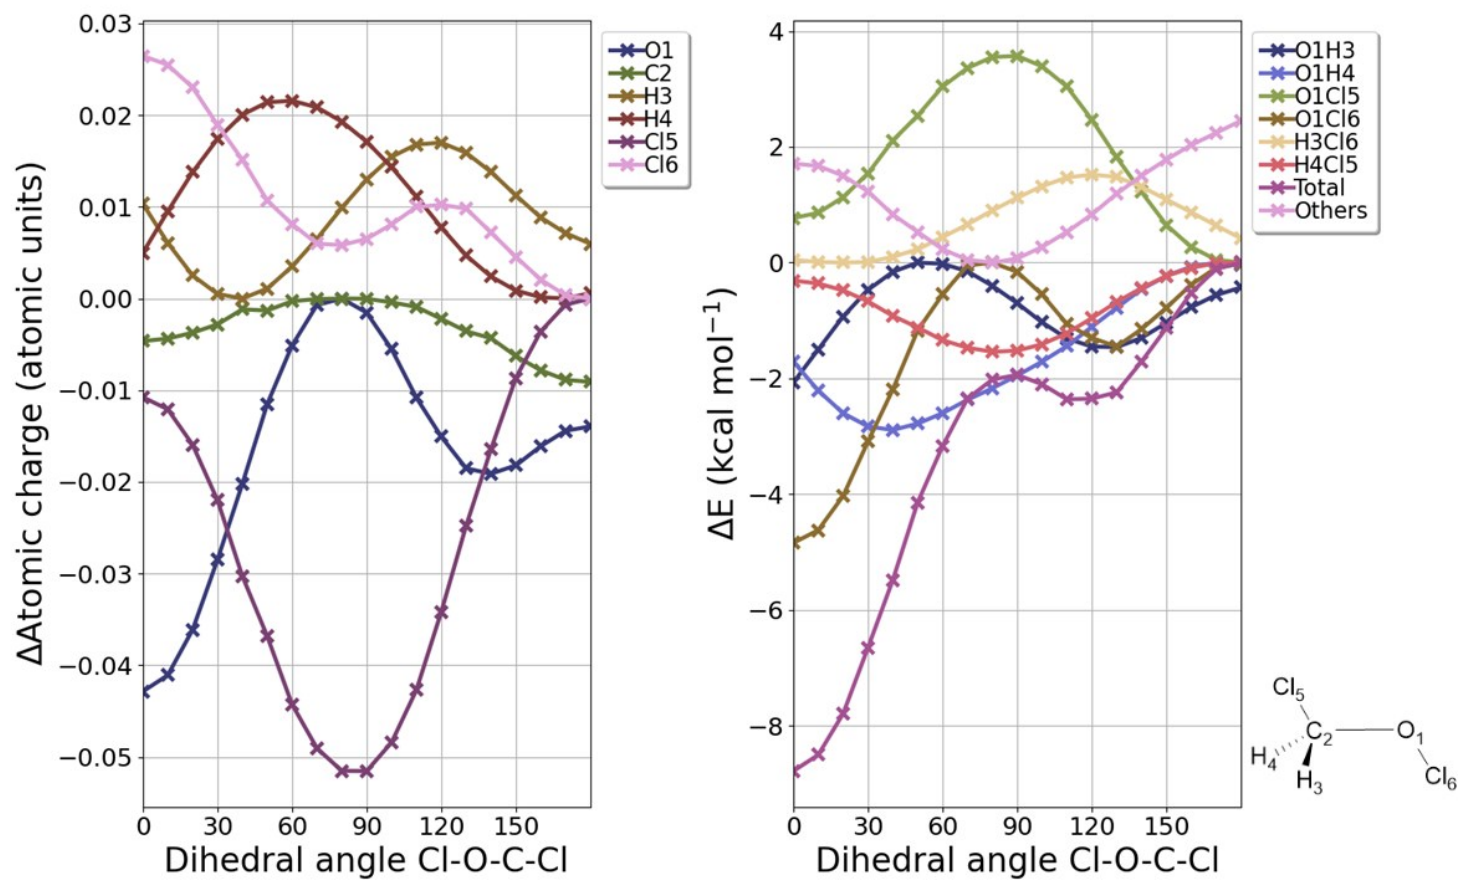

**Figure S50.** Atomic charges and natural Coulomb electrostatic (NCE) energy curves for ClCH<sub>2</sub>OCl calculated at the M06-2X/6-311++G(3df,2p) level.

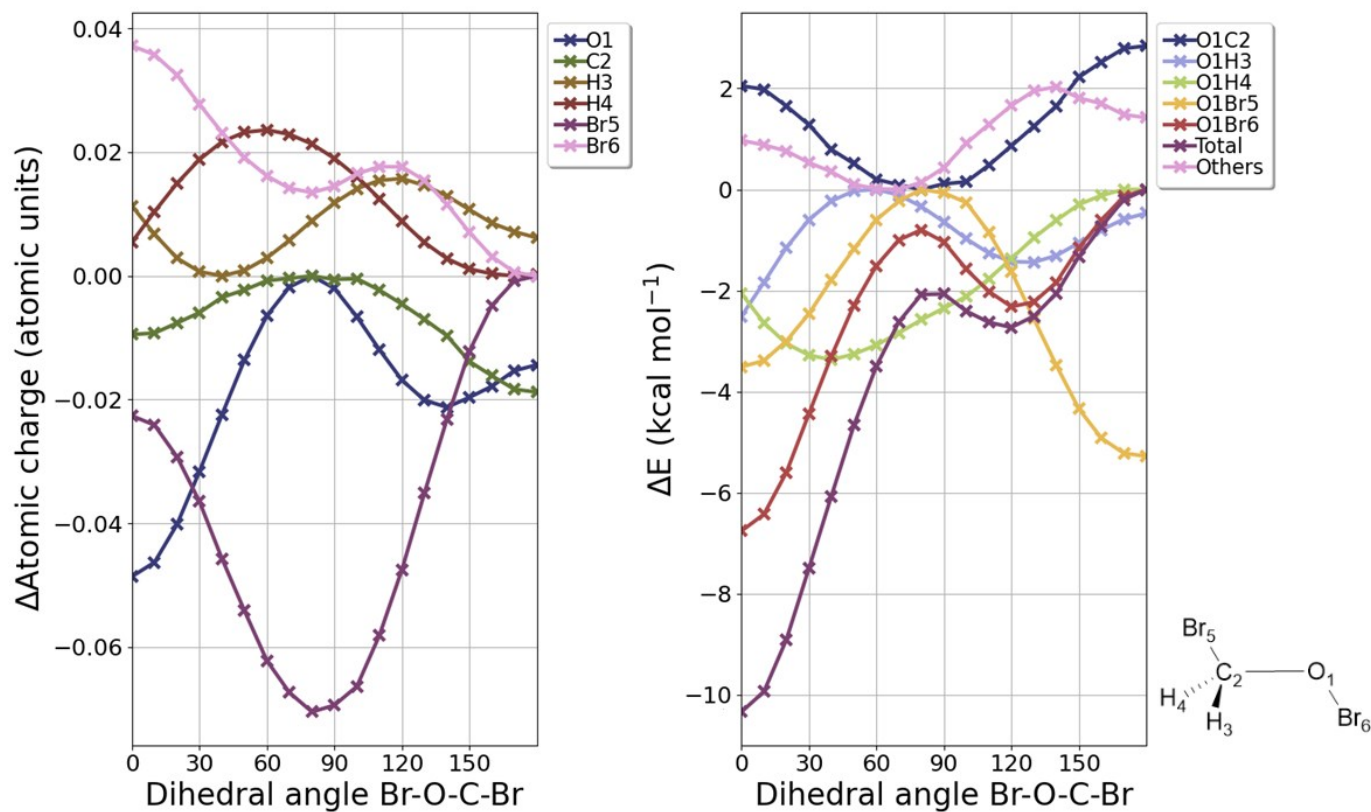

**Figure S51.** Atomic charges and natural Coulomb electrostatic (NCE) energy curves for BrCH<sub>2</sub>OBr calculated at the M06-2X/6-311++G(3df,2p) level.

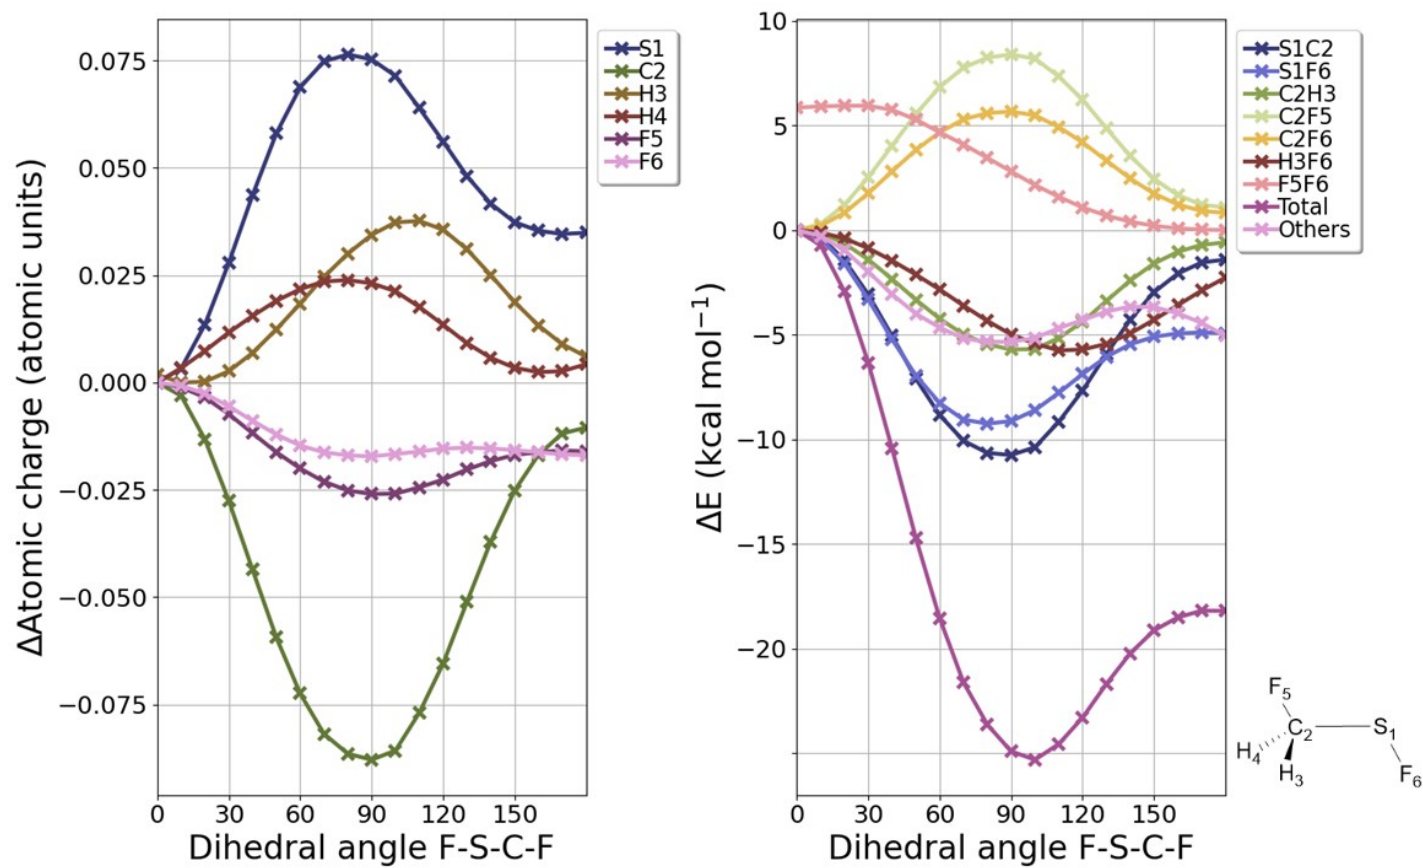

**Figure S52.** Atomic charges and natural Coulomb electrostatic (NCE) energy curves for FCH<sub>2</sub>SF calculated at the M06-2X/6-311++G(3df,2p) level.



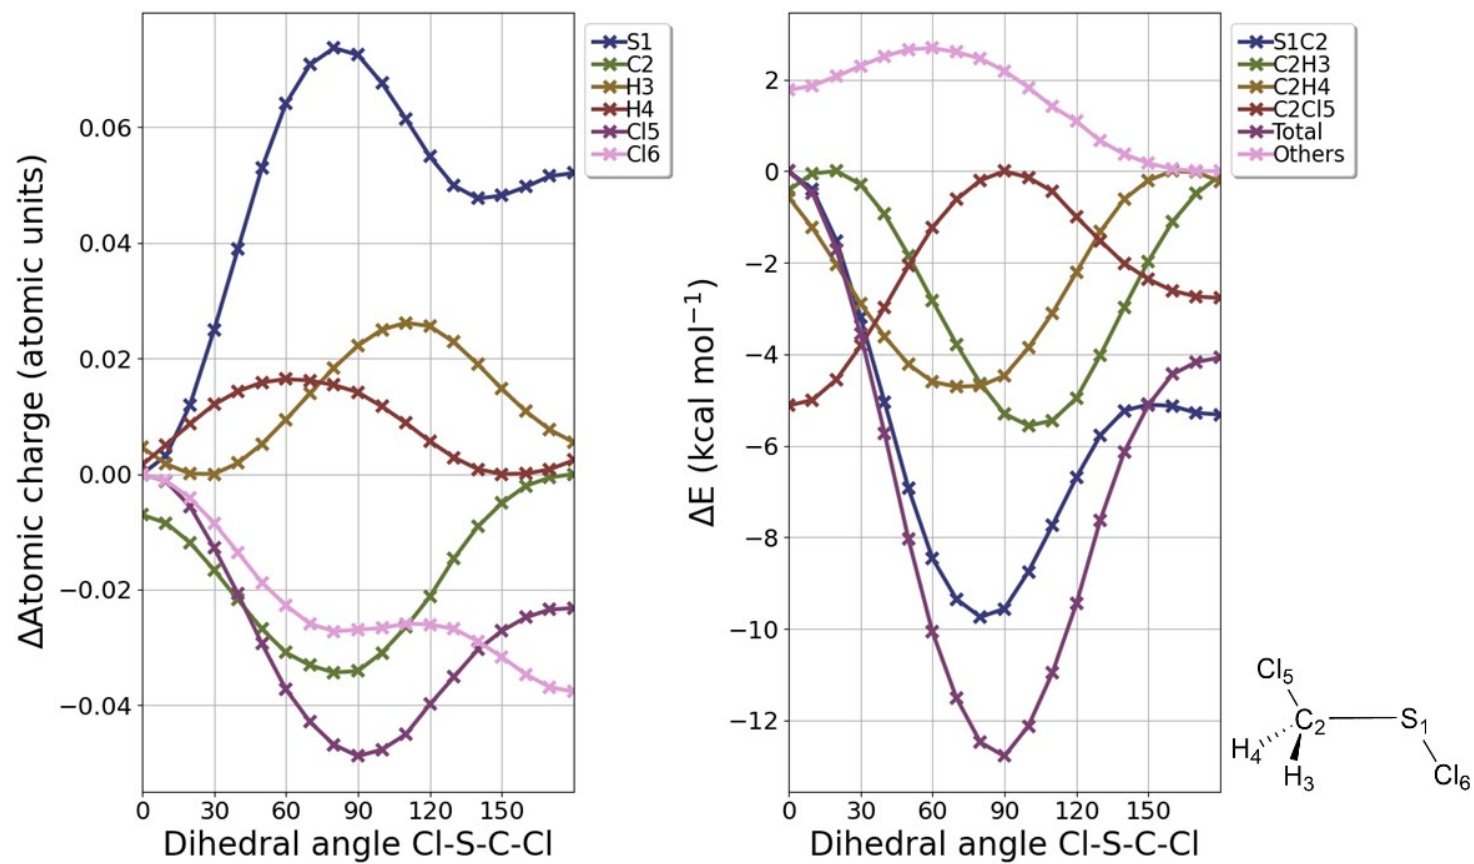

**Figure S53.** Atomic charges and natural Coulomb electrostatic (NCE) energy curves for ClCH<sub>2</sub>SCl calculated at the M06-2X/6-311++G(3df,2p) level.

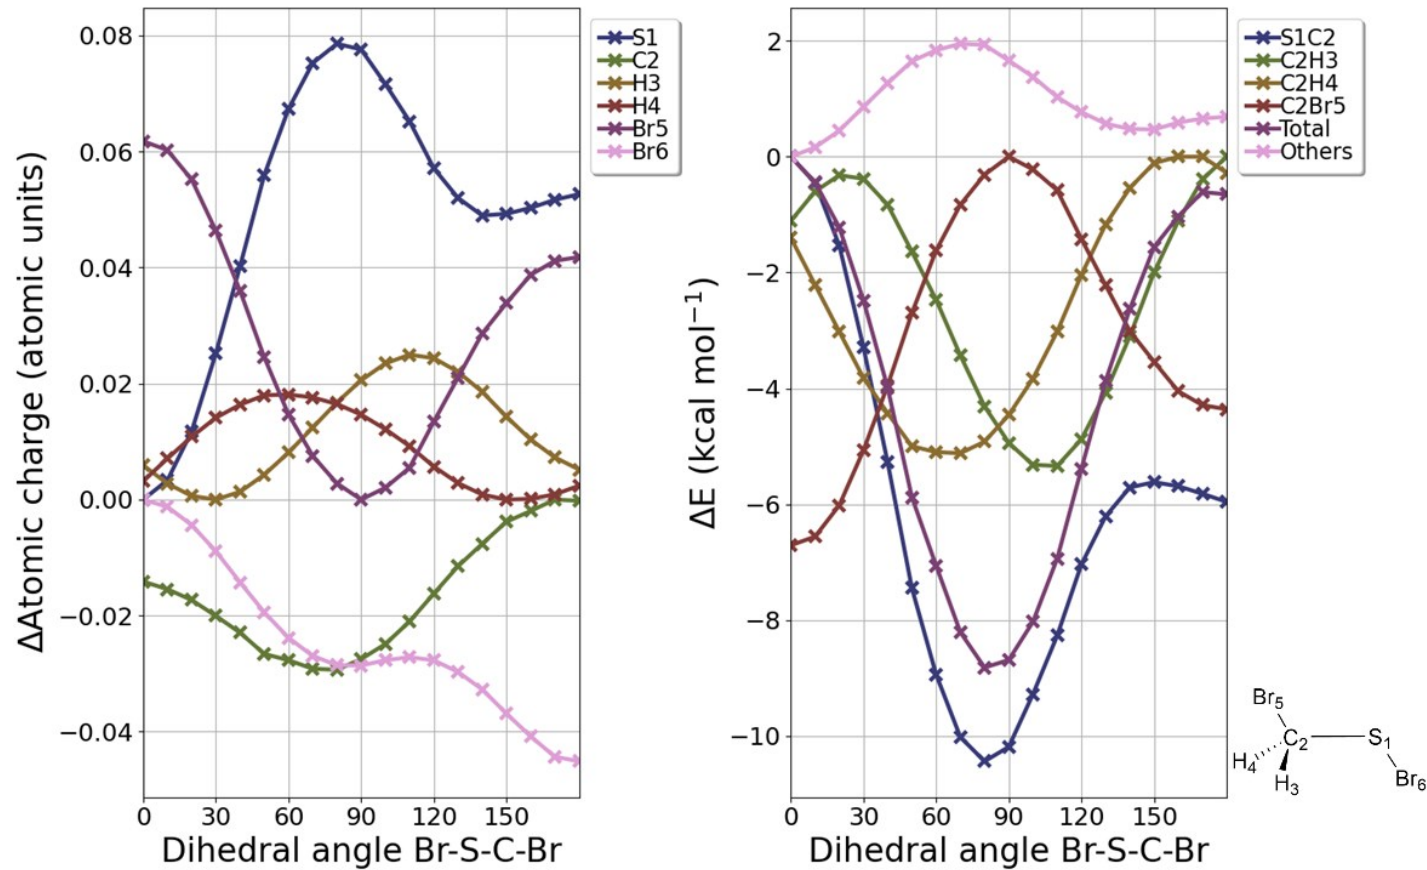

**Figure S54** Atomic charges and natural Coulomb electrostatic (NCE) energy curves for BrCH<sub>2</sub>SBr calculated at the M06-2X/6-311++G(3df,2p) level.

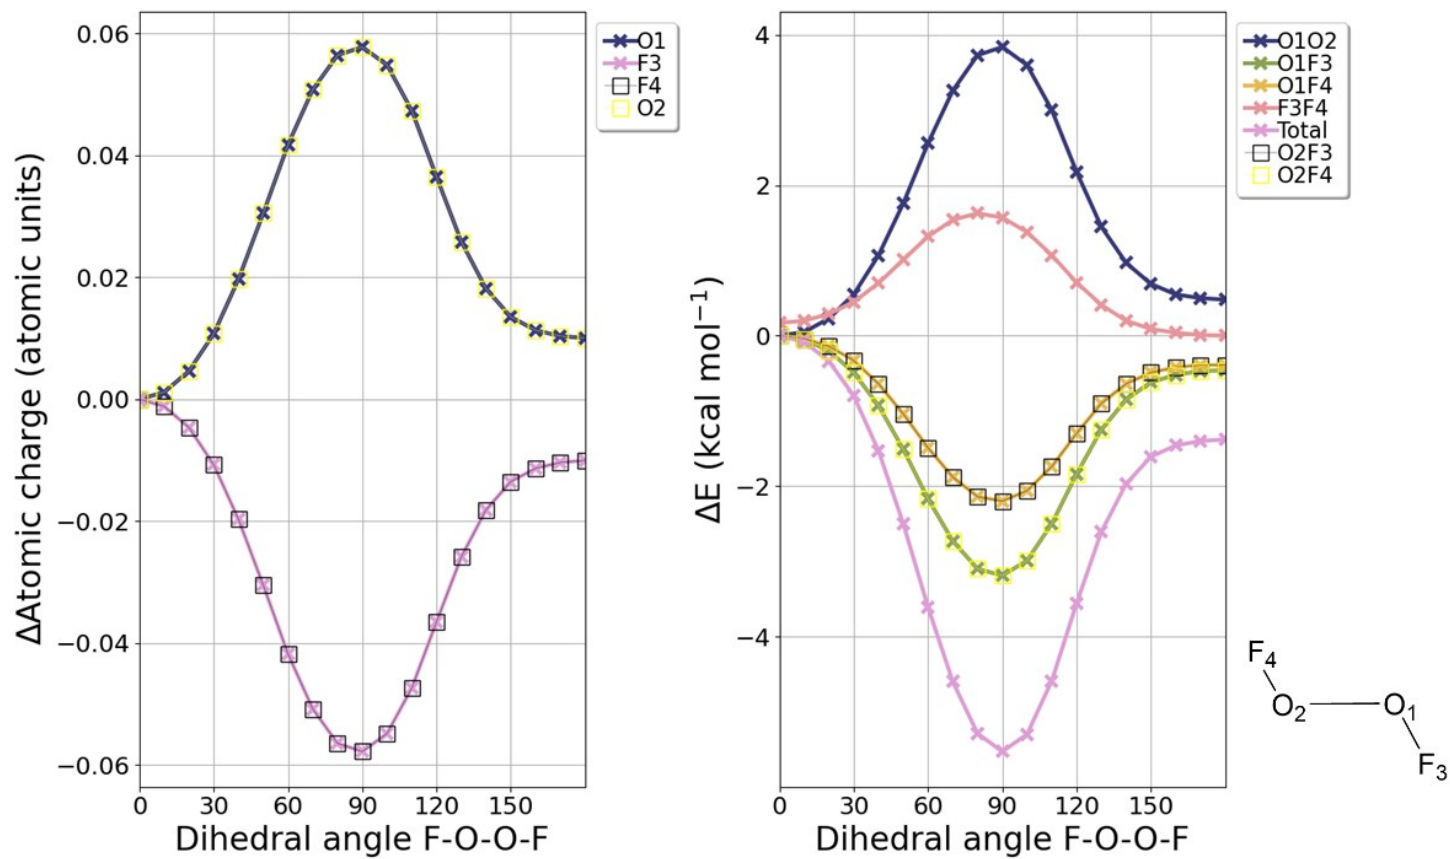

**Figure S55.** Atomic charges and natural Coulomb electrostatic (NCE) energy curves for FOOF calculated at the M06-2X/6-311++G(3df,2p) level.

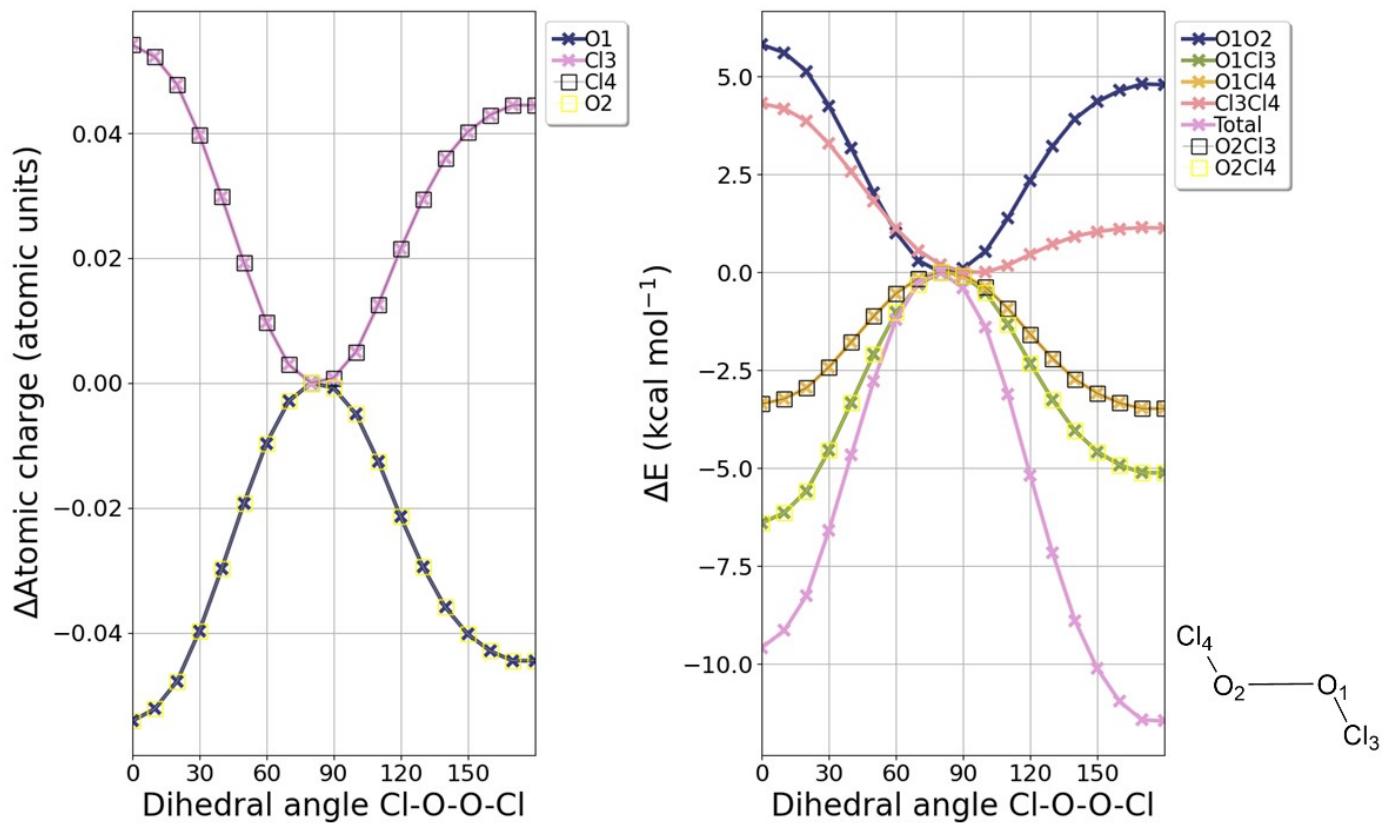

**Figure S56.** Atomic charges and natural Coulomb electrostatic (NCE) energy curves for ClOOCl calculated at the M06-2X/6-311++G(3df,2p) level.

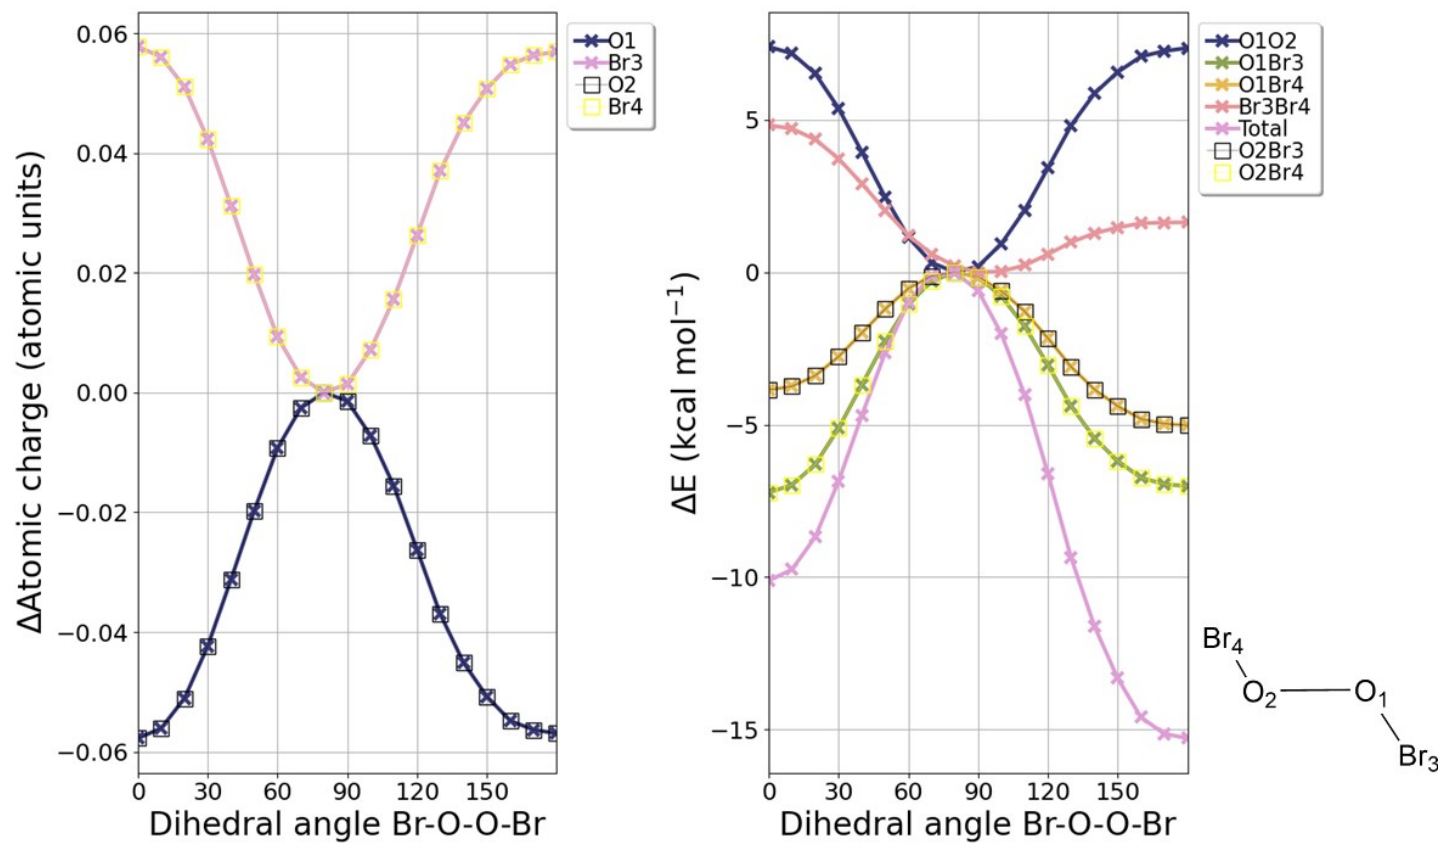

**Figure S57.** Atomic charges and natural Coulomb electrostatic (NCE) energy curves for BrOOBr calculated at the M06-2X/6-311++G(3df,2p) level.

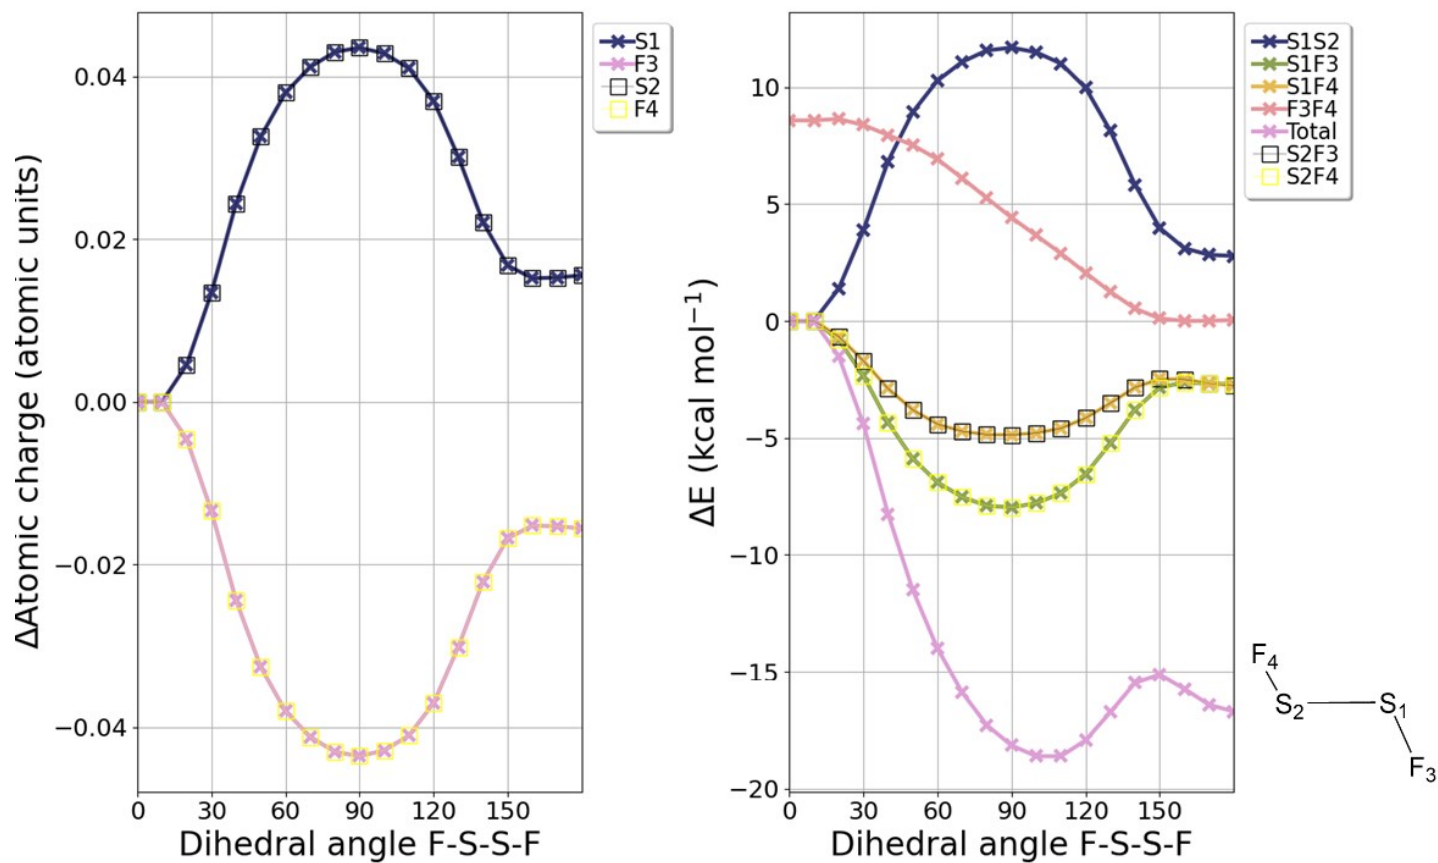

**Figure S58.** Atomic charges and natural Coulomb electrostatic (NCE) energy curves for FSSF calculated at the M06-2X/6-311++G(3df,2p) level.

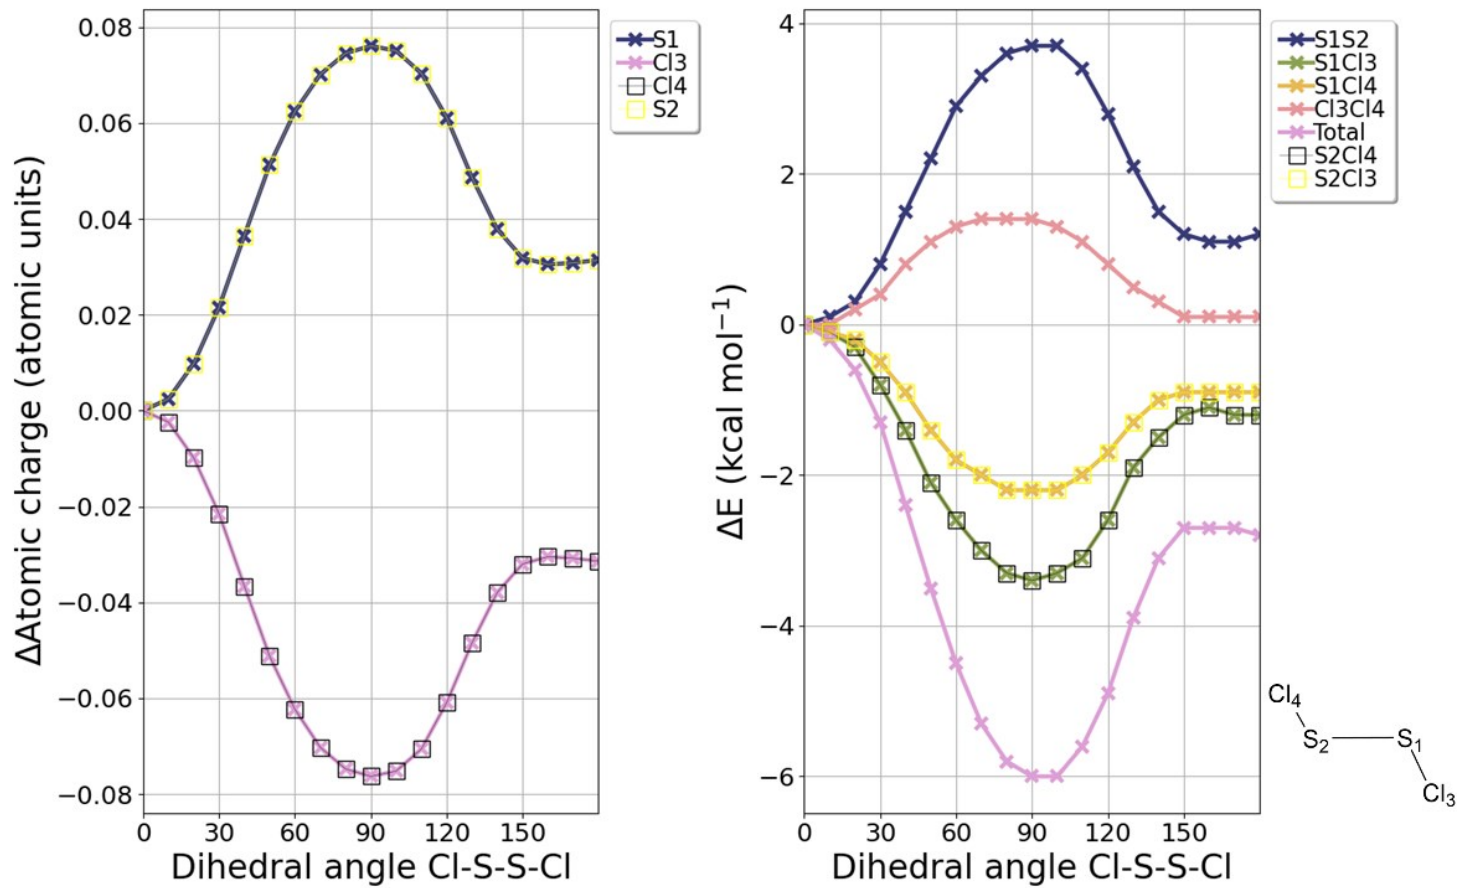

**Figure S59.** Atomic charges and natural Coulomb electrostatic (NCE) energy curves for ClSSCl calculated at the M06-2X/6-311++G(3df,2p) level.



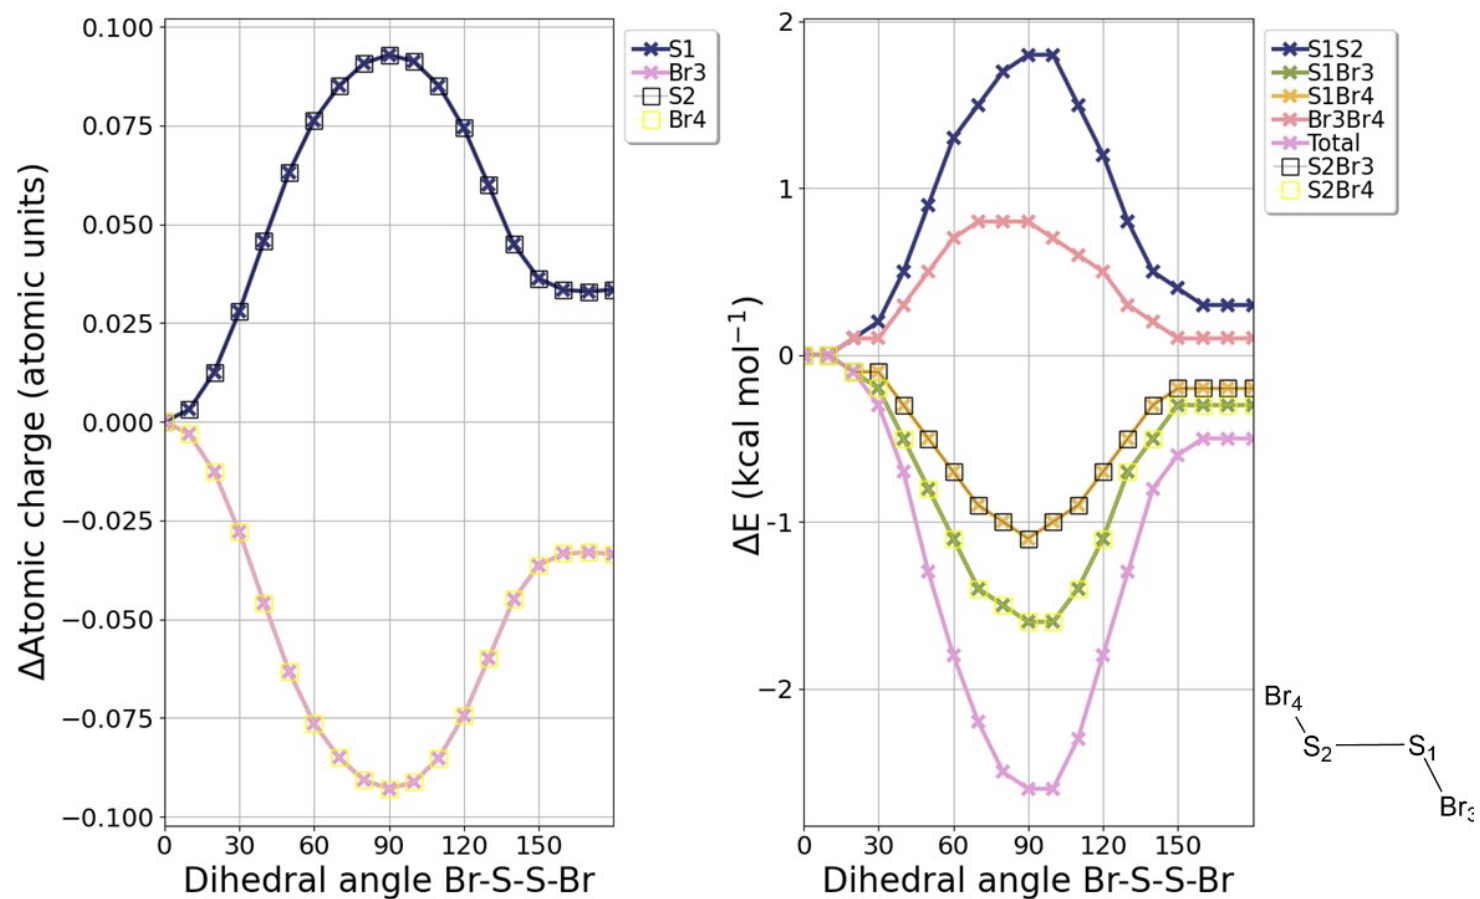

**Figure S60.** Atomic charges and natural Coulomb electrostatic (NCE) energy curves for BrSSBr calculated at the M06-2X/6-311++G(3df,2p) level.



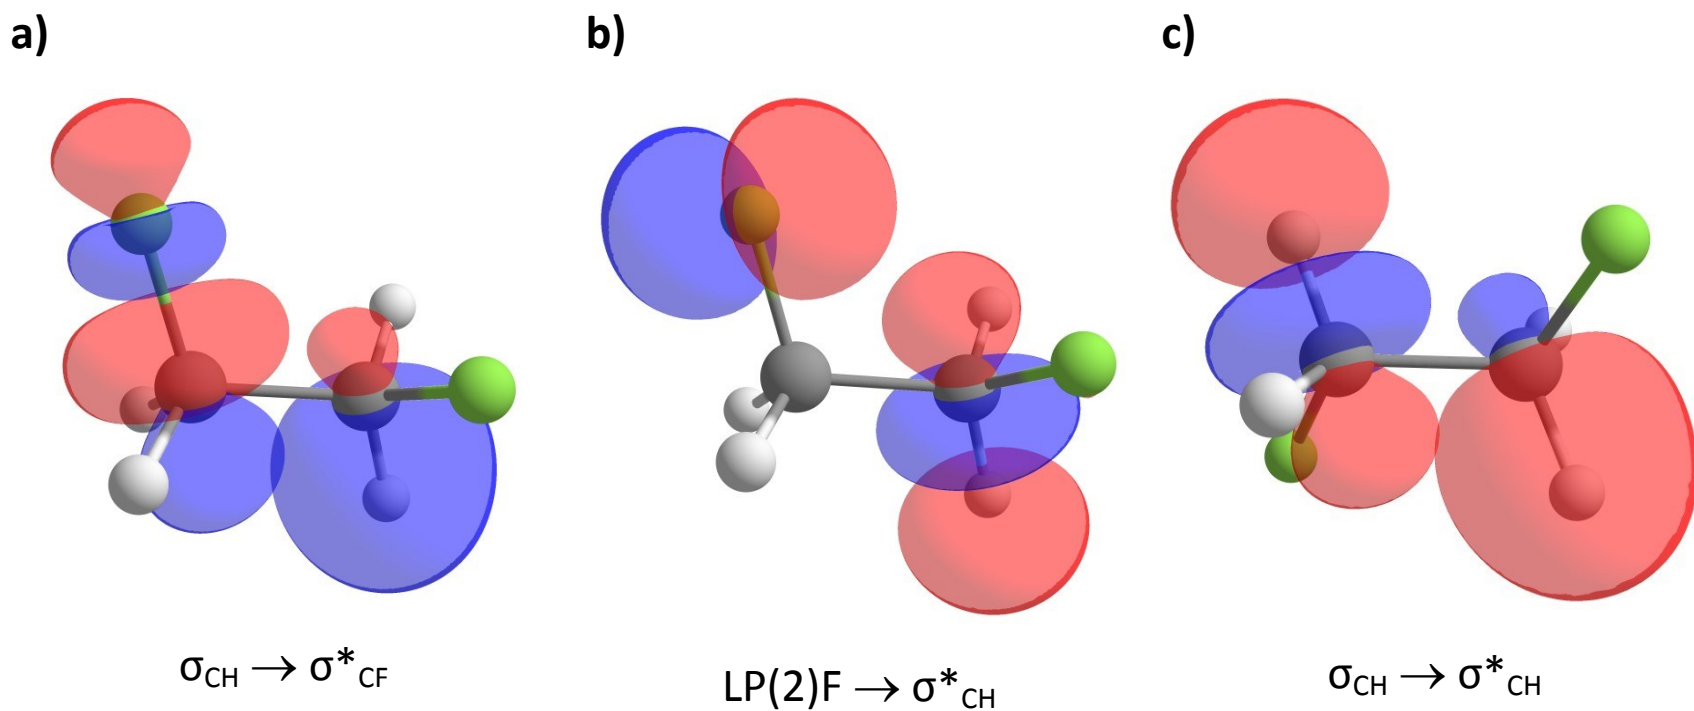

**Figure S61.** **a)**  $\sigma_{\text{CH}} \rightarrow \sigma^*_{\text{CF}}$  and **b)**  $\text{LP}(2)\text{F} \rightarrow \sigma^*_{\text{CH}}$  hyperconjugative interaction representations for the *gauche* and **c)**  $\text{LP}(2)\text{F} \rightarrow \sigma^*_{\text{CH}}$  hyperconjugative interaction for the *anti* conformer of  $\text{FCH}_2\text{CH}_2\text{F}$ . All orbital isosurfaces were plotted with isovalues of 0.07 au.

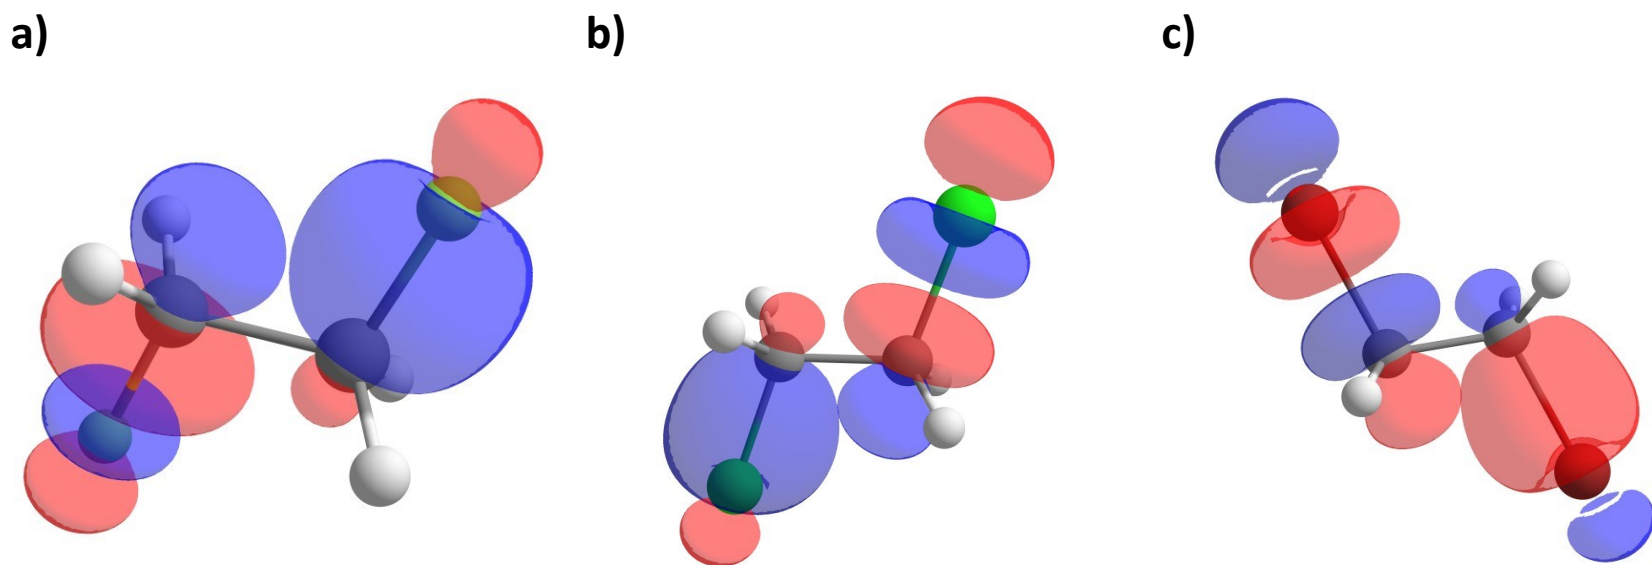

**Figure S62.** a)  $\sigma_{CF} \rightarrow \sigma_{CF}^*$ , b)  $\sigma_{CCl} \rightarrow \sigma_{CCl}^*$  and c)  $\sigma_{CBr} \rightarrow \sigma_{CBr}^*$  hyperconjugative interaction representations for the *anti* conformers of FCH<sub>2</sub>CH<sub>2</sub>F, ClCH<sub>2</sub>CH<sub>2</sub>Cl and BrCH<sub>2</sub>CH<sub>2</sub>Br, respectively. All orbital isosurfaces were plotted with isovalues of 0.07 au.

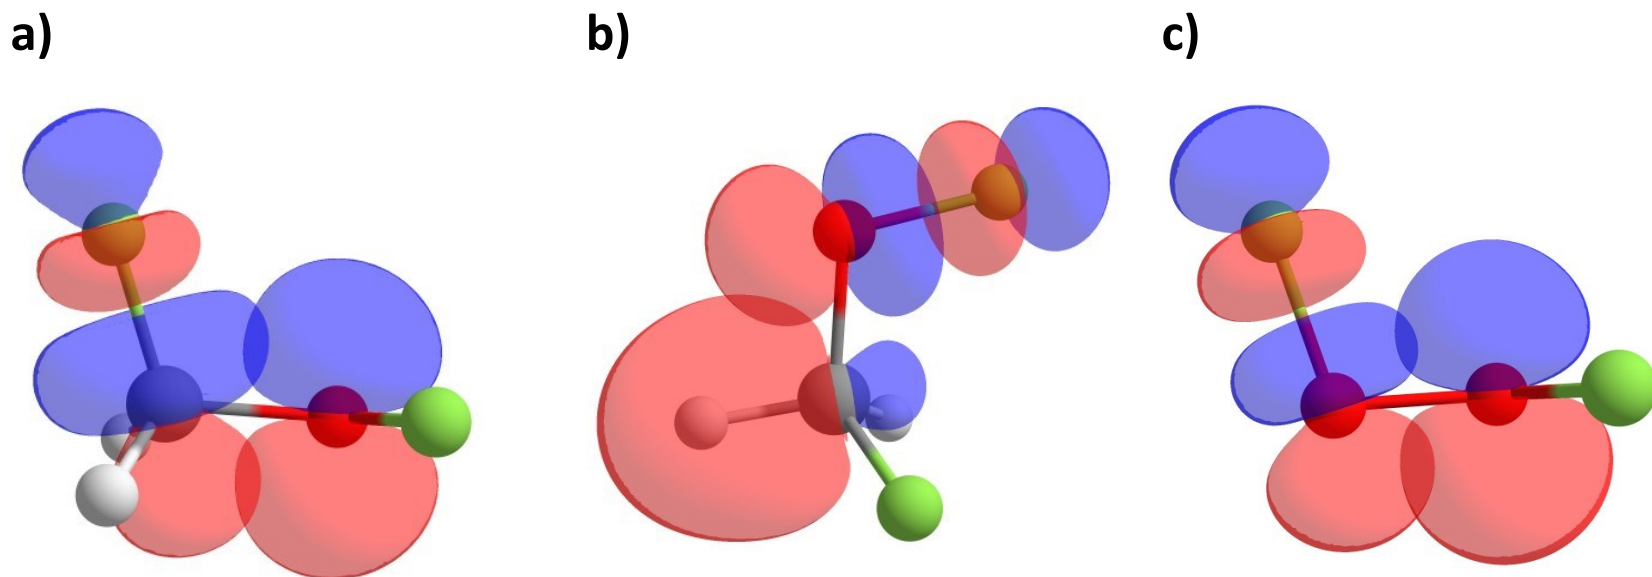

**Figure S63.** **a)**  $\text{LP}(2)\text{O} \rightarrow \sigma^*_{\text{CF}}$  **b)**  $\sigma_{\text{CH}} \rightarrow \sigma^*_{\text{OF}}$  hyperconjugative interactions for the *gauche* conformer of  $\text{FCH}_2\text{OF}$  and **c)**  $\text{LP}(2)\text{O} \rightarrow \sigma^*_{\text{OF}}$  for the *gauche* conformer of  $\text{FOOF}$ . All orbital isosurfaces were plotted with isovalues of 0.07 a.u.

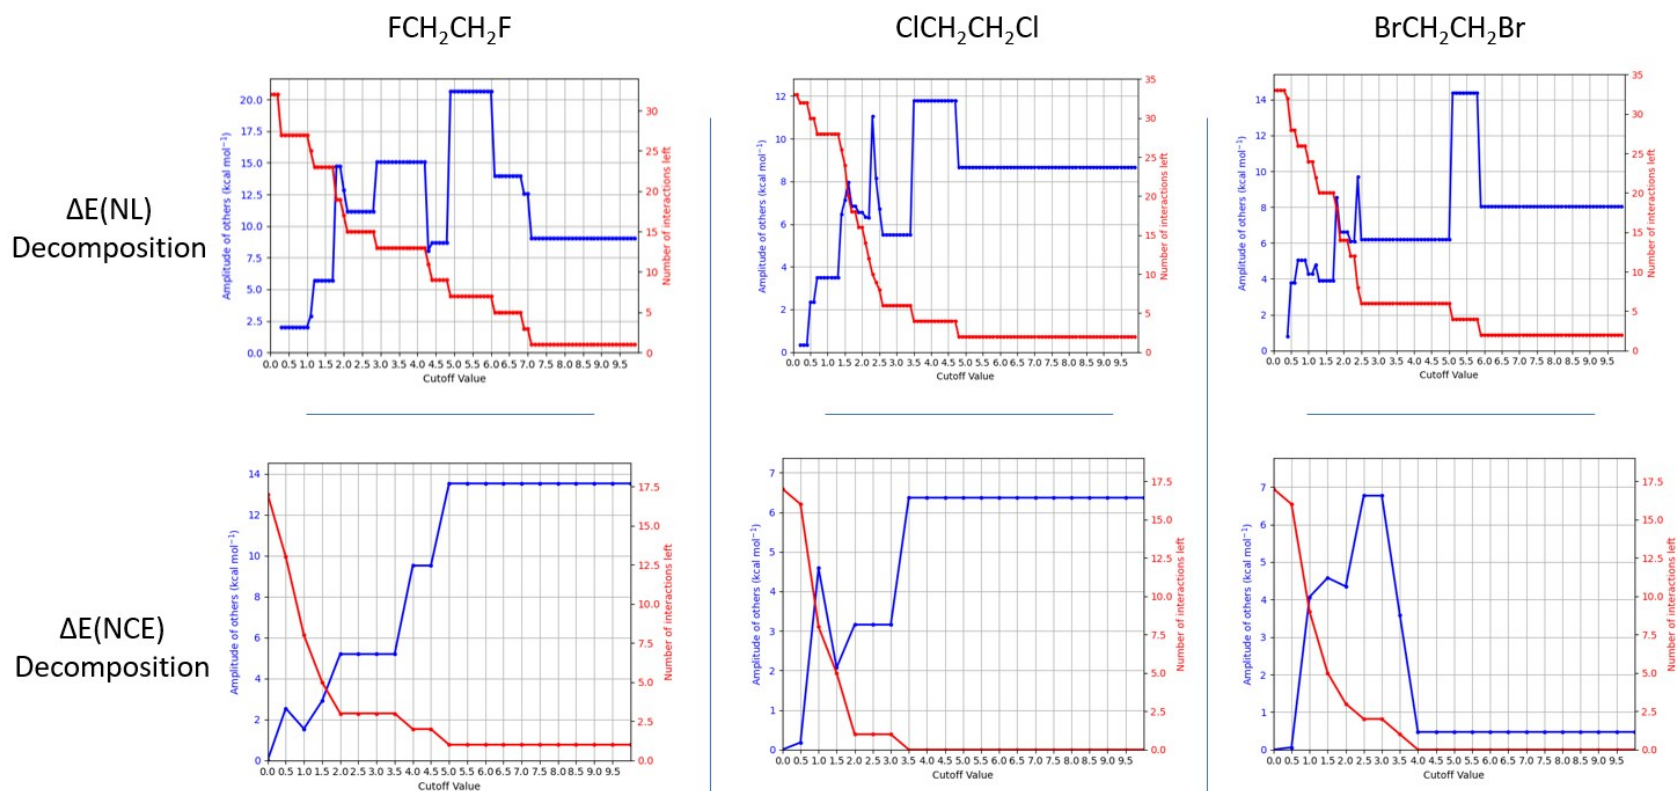

**Figure S64.** Number of remaining hyperconjugative interactions and the amplitude of the “Others” curve *versus* the cutoff value for the decomposition of hyperconjugative interactions and electrostatics interactions for  $\text{XCH}_2\text{CH}_2\text{X}$  molecules.

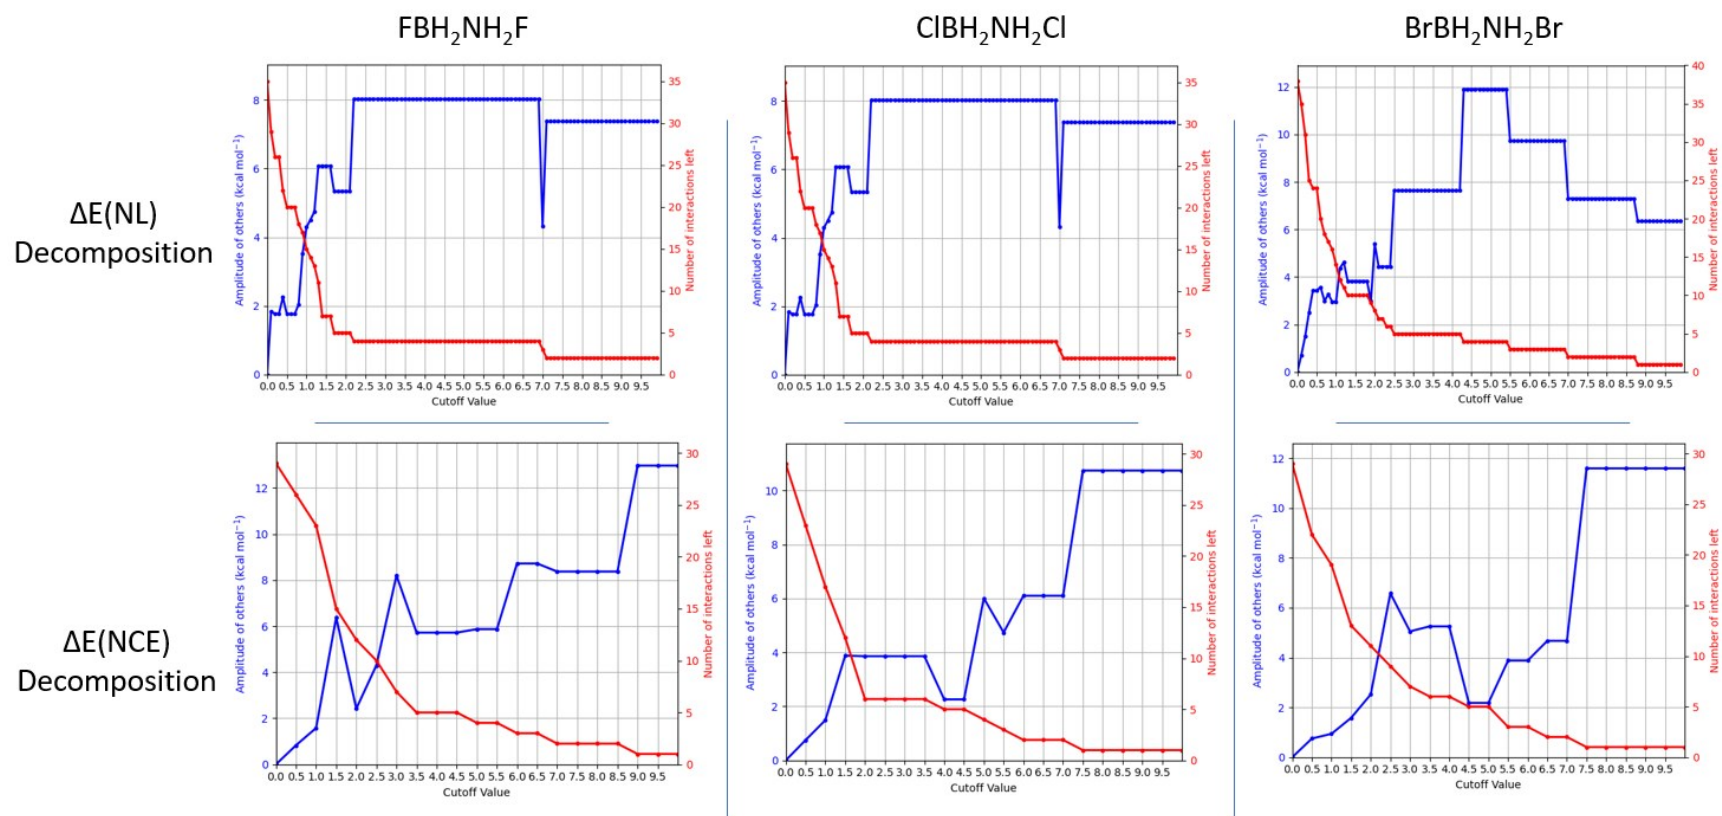

**Figure S65.** Number of remaining hyperconjugative interactions and the amplitude of the “Others” curve *versus* the cutoff value for the decomposition of hyperconjugative interactions and electrostatics interactions for  $\text{XBH}_2\text{NH}_2\text{X}$  molecules.

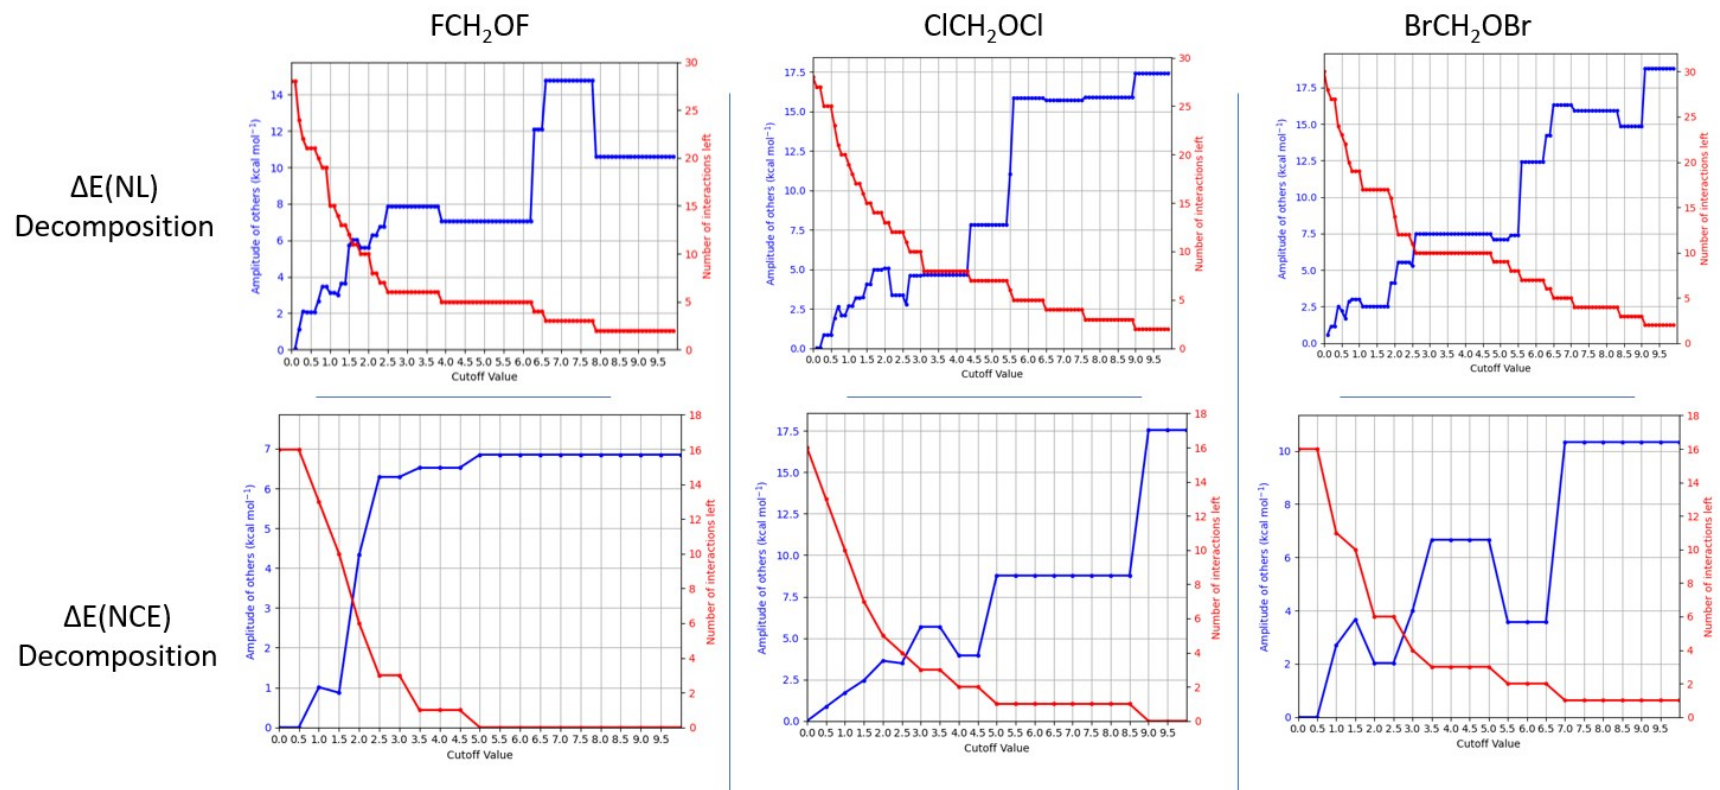

**Figure S66.** Number of remaining hyperconjugative interactions and the amplitude of the “Others” curve *versus* the cutoff value for the decomposition of hyperconjugative interactions and electrostatics interactions for XCH<sub>2</sub>OX molecules.



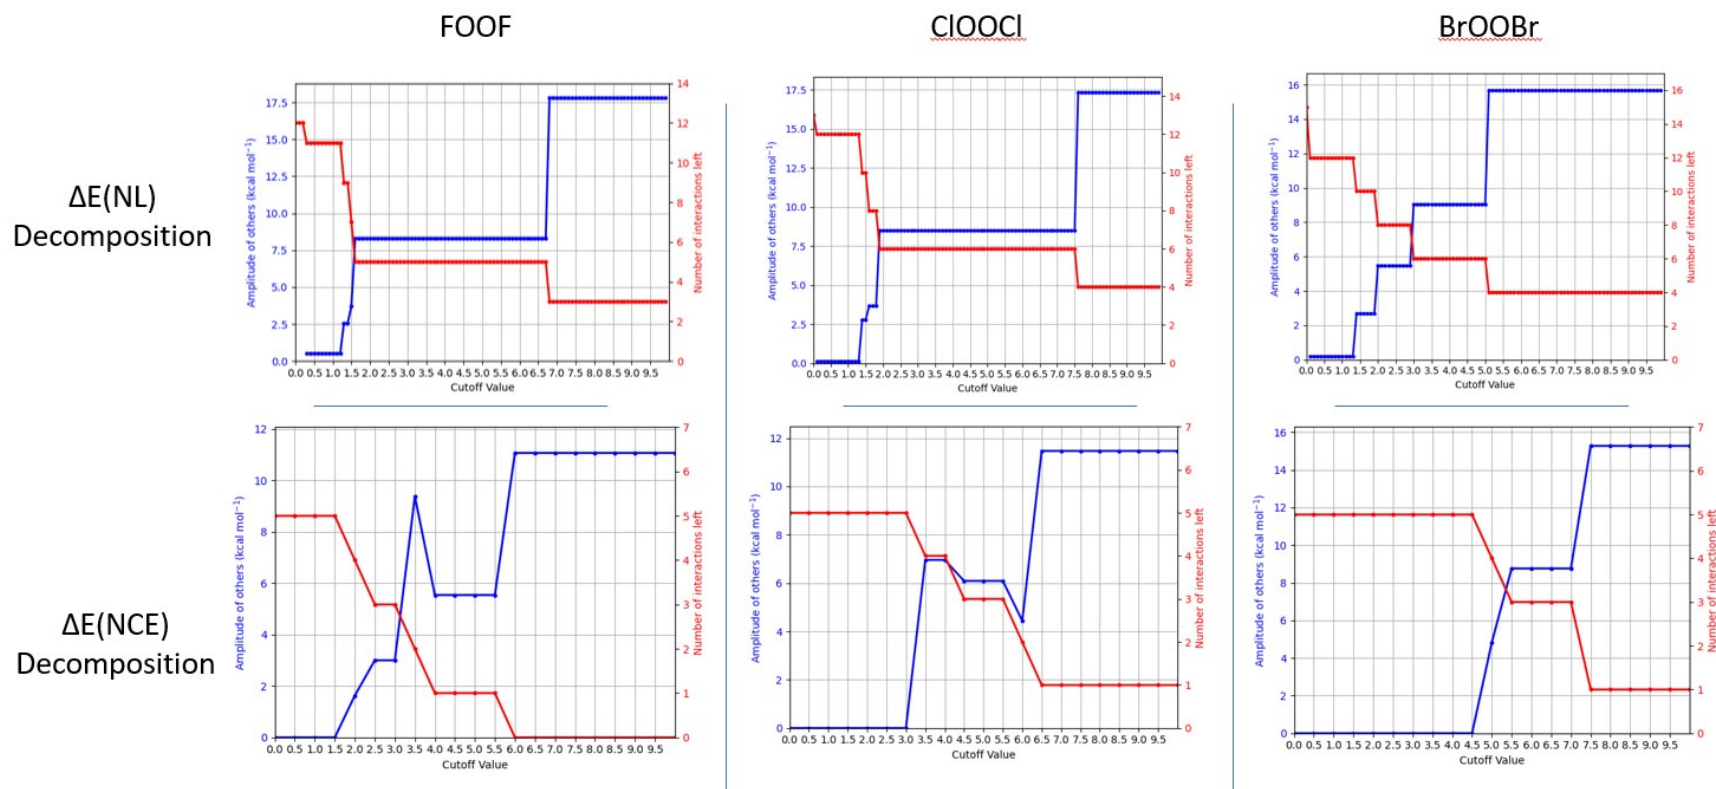

**Figure S67.** Number of remaining hyperconjugative interactions and the amplitude of the “Others” curve *versus* the cutoff value for the decomposition of hyperconjugative interactions and electrostatics interactions for XOOX molecules.

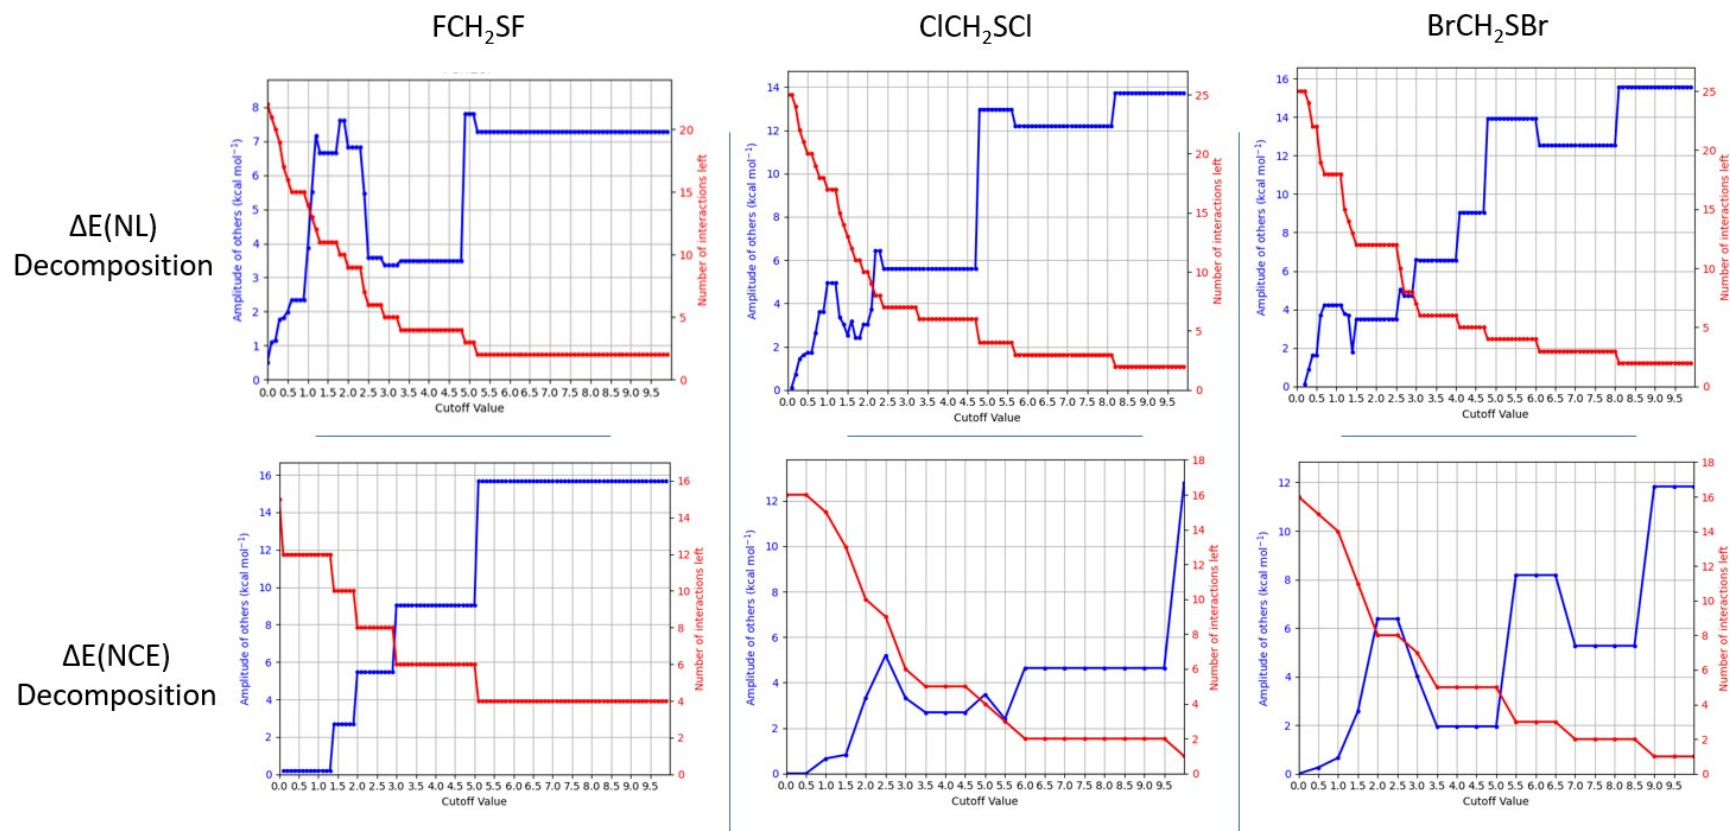

**Figure S68.** Number of remaining hyperconjugative interactions and the amplitude of the “Others” curve *versus* the cutoff value for the decomposition of hyperconjugative interactions and electrostatics interactions for  $\text{XCH}_2\text{SX}$  molecules.



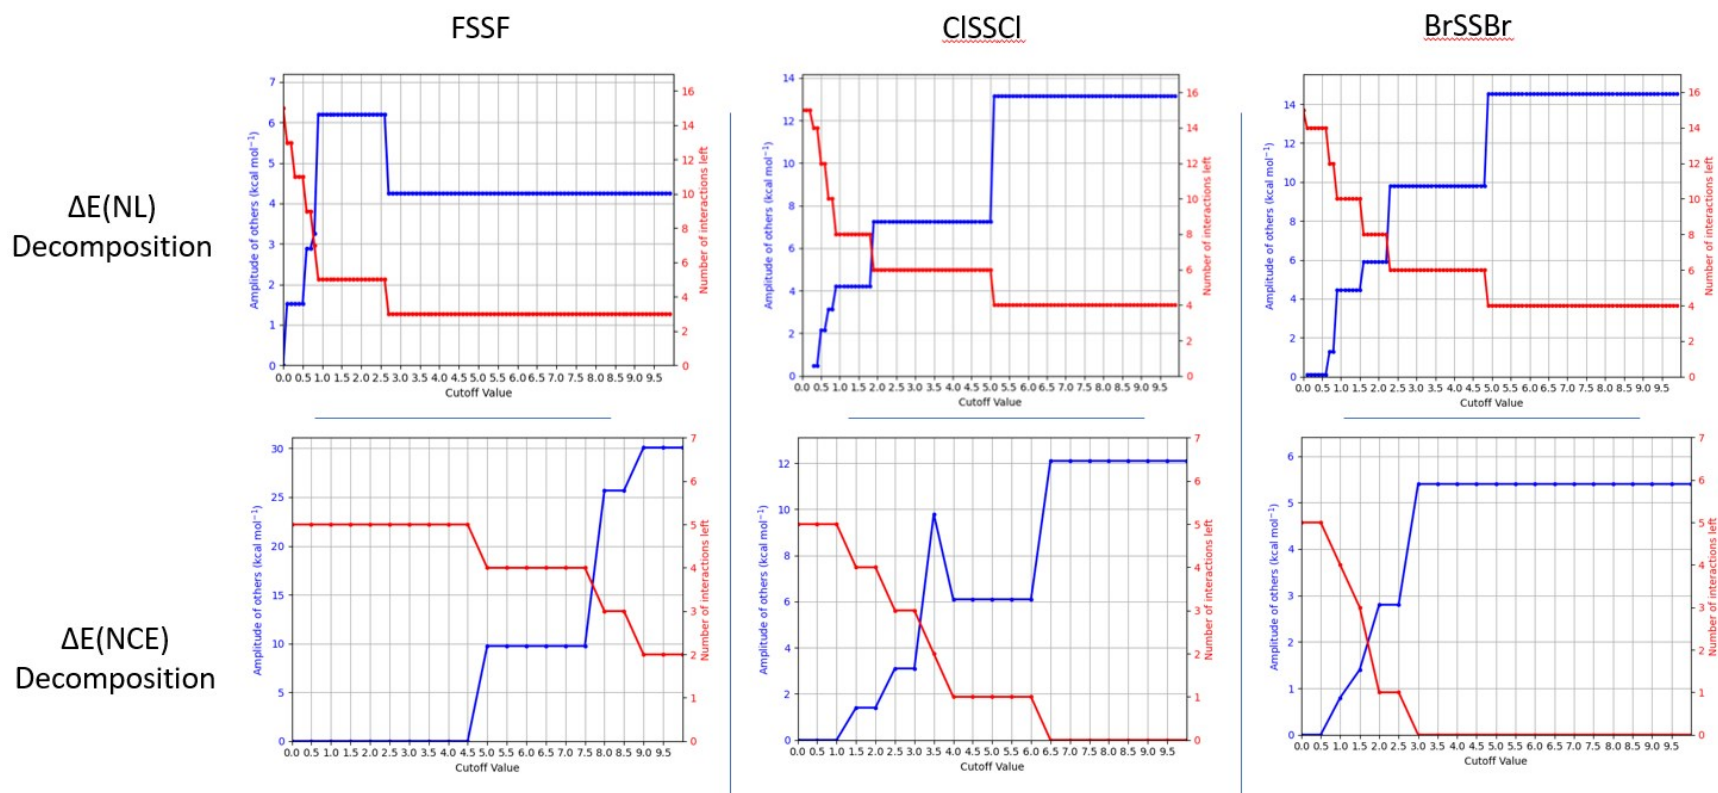

**Figure S69.** Number of remaining hyperconjugative interactions and the amplitude of the “Others” curve *versus* the cutoff value for the decomposition of hyperconjugative interactions and electrostatics interactions for XSSX molecules.

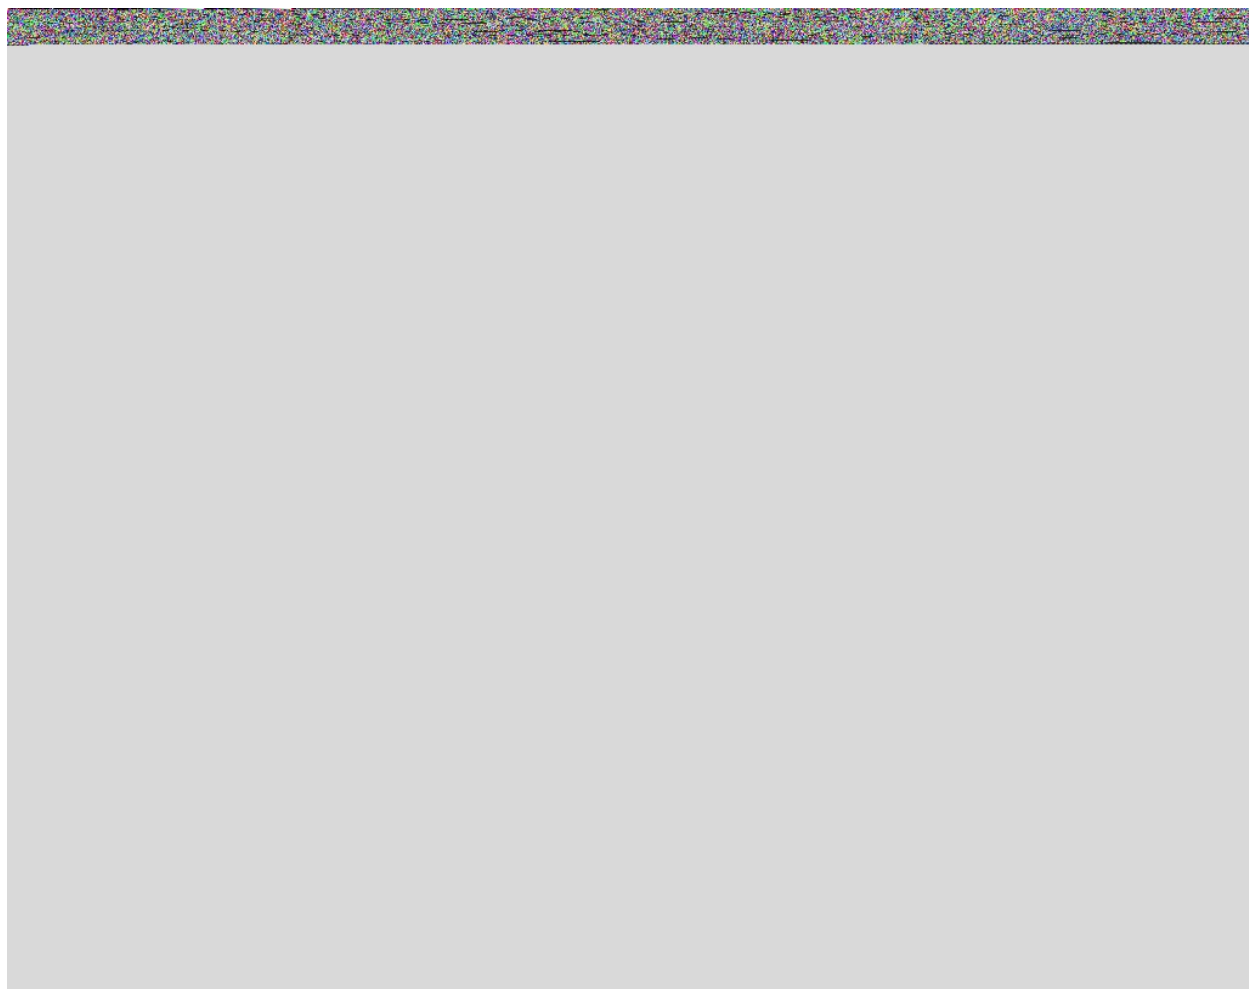

**Figure S70.** NBO deletion analysis calculated for  $\text{CF}_3\text{OOCF}_3$  at the M06-2X/6-311++G(3df,2p) level

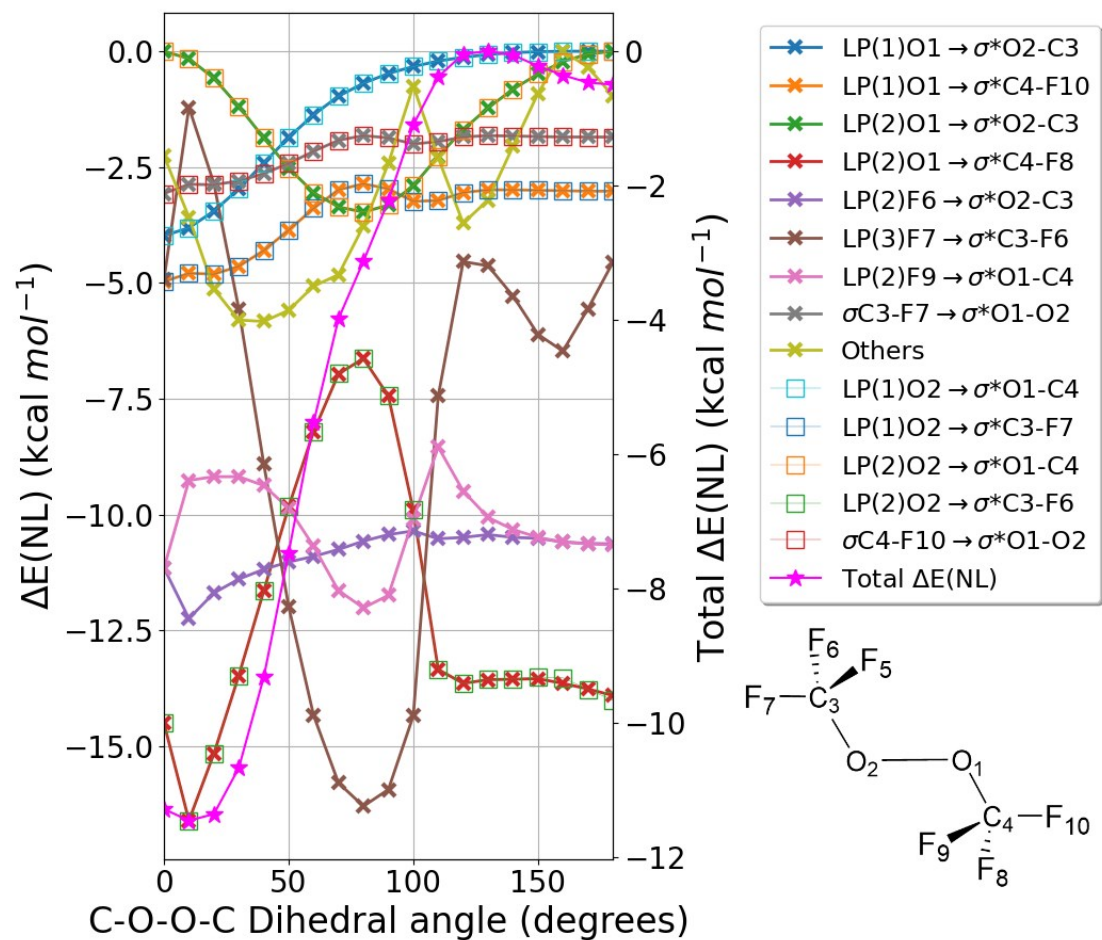

**Figure S71.** Hyperconjugation interaction energies for  $\text{CF}_3\text{OOCF}_3$  obtained at the M06-2X/6-311++G(3df,2p) level using NBO analysis.

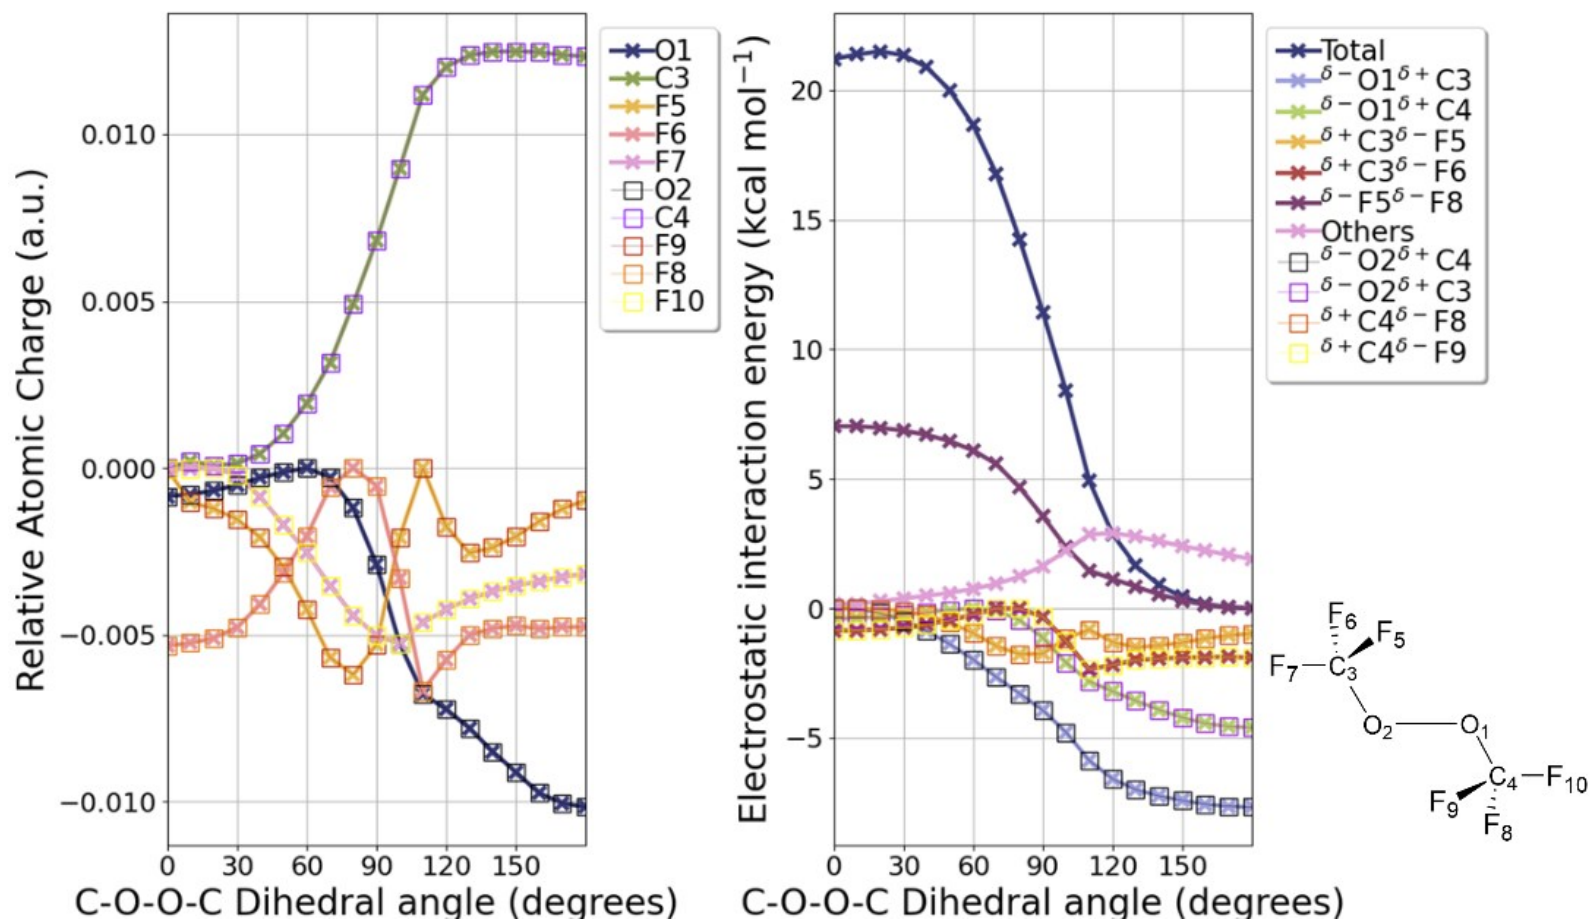

**Figure S72.** Atomic charges and natural Coulomb electrostatic (NCE) energy curves for CF<sub>3</sub>OOCF<sub>3</sub> calculated at the M06-2X/6-311++G(3df,2p) level.
